# Supplementary material
Source: PubMed Central journal article supplement (PMC5054938)
Supplement: ja6b04789_si_001.pdf [file ja6b04789_si_001.pdf]

# Photochemical Nickel-Catalyzed C-H Arylation: Synthetic Scope and Mechanistic Investigations

Drew R. Heitz, John C. Tellis, and Gary A. Molander\*

Roy and Diana Vagelos Laboratories, Department of Chemistry,

University of Pennsylvania, Philadelphia,

Pennsylvania 19104-6323

\*To whom correspondence should be addressed. E-mail: [gmolandr@sas.upenn.edu](mailto:gmolandr@sas.upenn.edu)

## Supplementary Material

|                                          |     |
|------------------------------------------|-----|
| General Considerations.....              | S2  |
| General Procedure for C-H Arylation..... | S2  |
| Light Output.....                        | S2  |
| Compound Characterization Data.....      | S4  |
| Spectral Data.....                       | S10 |
| References.....                          | S51 |

## General Considerations

All reactions were carried out under an inert atmosphere of argon unless otherwise noted. Solvents were purchased extra dry or distilled prior to use.  $\text{K}_2\text{HPO}_4$  was used as received. The iridium photocatalyst,  $\text{Ir}[\text{dFCF}_3\text{ppy}]_2(\text{bpy})\cdot\text{PF}_6$ , was synthesized from  $\text{IrCl}_3\cdot x\text{H}_2\text{O}$  according to our previously reported procedure.<sup>1</sup>  $\text{NiNO}_3\cdot 6\text{H}_2\text{O}$  was purchased and used as received from a commercial source. Reactions were irradiated with two standard 26 W compact fluorescent light bulbs. Melting points ( $^\circ\text{C}$ ) are uncorrected. Column chromatography was performed by Combiflash using RediSep Rf Gold Normal-Phase silica columns.  $^1\text{H}$  (500 MHz) and  $^{13}\text{C}$  (126 MHz) NMR chemical shifts are reported relative to internal TMS. HRMS spectra (ESI-TOF) were collected in  $\text{CH}_2\text{Cl}_2$  or MeCN.

## General Procedure for C-H Arylation

4,4'-Di-*tert*-Butyl-2,2'-bipyridine (4.7 mg, 0.0175 mmol) and  $\text{NiNO}_3\cdot 6\text{H}_2\text{O}$  (3.2 mg, 0.0175 mmol) were weighed into a 10 mL vial and were placed under argon. Then 1 mL of dry, degassed THF was added, and the mixture was heated at  $50^\circ\text{C}$  until a pale green solution was obtained. For coupling reactions in THF, an additional 6 mL of THF was added (0.05 M overall), followed by addition of the aryl bromide (0.35 mmol, 1 equiv) (liquid aryl bromides were added with the solvent).  $\text{Ir}[\text{dFCF}_3\text{ppy}]_2(\text{bpy})\cdot\text{PF}_6$  (3.5 mg, 2 mol %, 0.02 mmol), 4,4'-dimethoxybenzophenone (21 mg, 25 mol %, 0.0875 mmol), and  $\text{K}_2\text{HPO}_4$  (122 mg, 2.0 equiv, 0.7 mmol) were added sequentially. For reactions with other solvent-substrates, THF was removed, and 7 mL of distilled solvent (0.05 M), aryl bromide (0.35 mmol, 1 equiv) (liquid aryl bromides were added with the solvent),  $\text{Ir}[\text{dFCF}_3\text{ppy}]_2(\text{bpy})\cdot\text{PF}_6$  (3.5 mg, 2 mol %, 0.02 mmol), 4,4'-dimethoxybenzophenone (21 mg, 25 mol %, 0.0875 mmol), and  $\text{K}_2\text{HPO}_4$  (122 mg, 2.0 equiv, 0.7 mmol) were added sequentially. The resulting mixtures was stirred approximately 4 cm away from two 26 W fluorescent light bulbs while a fan was blown across the reaction setup to maintain a temperature of  $25^\circ\text{C}$ . Reaction progress was monitored by HPLC, GCMS, or TLC. Upon consumption of aryl bromide, the crude reaction mixture was filtered through a cylindrical plug of Celite and rinsed with  $\text{CH}_2\text{Cl}_2$  and EtOAc (10-20 mL). The filtrate was concentrated by rotary evaporation, and the residue was purified by column chromatography on silica gel, eluting with EtOAc and hexanes, to obtain products in pure form.

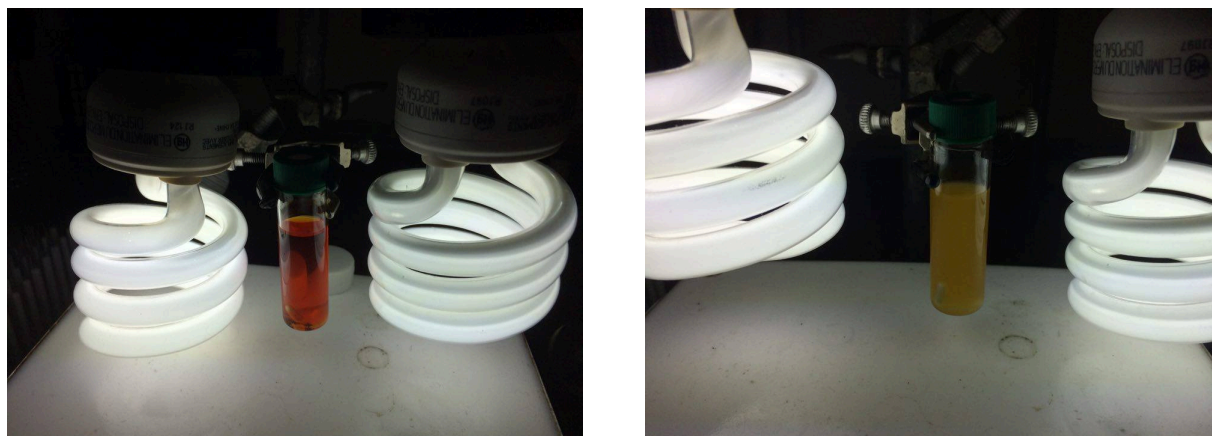

**Figure S-1:** Initial appearance of reaction (left). Appearance upon completion of reaction (right).

## Light Output

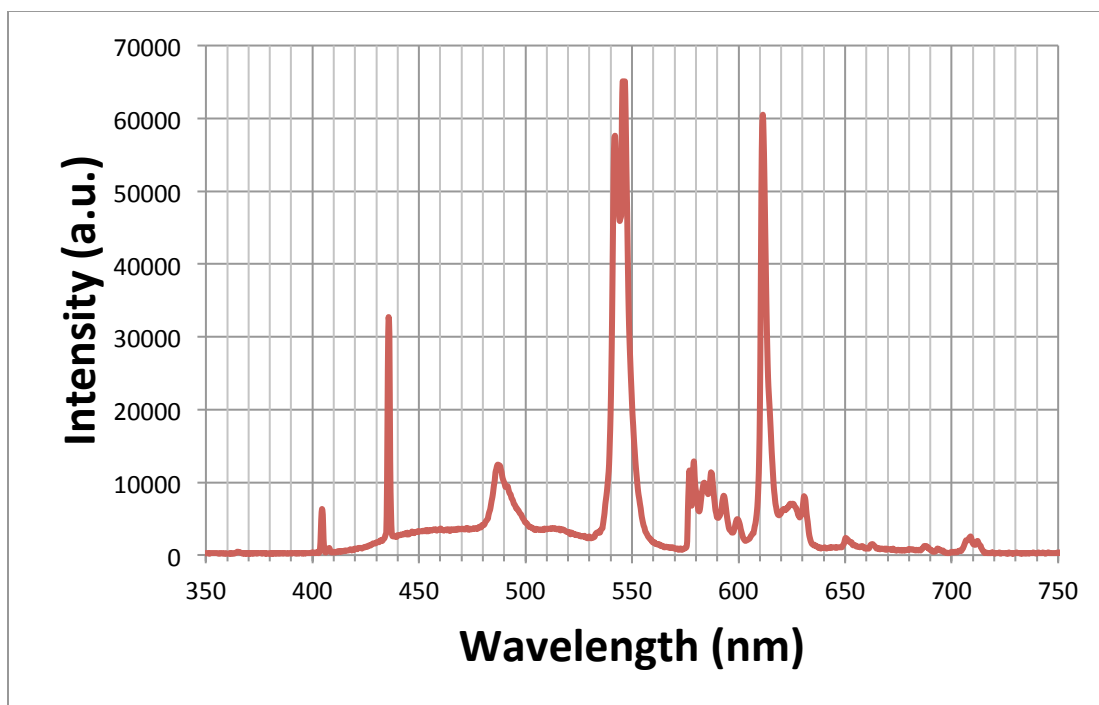

*Figure S-2:* Emission spectrum of 26 W CFL used for photocatalytic C-H arylation.

## Compound Characterization Data

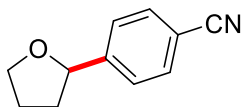

**4-(Tetrahydrofuran-2-yl)benzonitrile (2):** obtained as a colorless oil (70%, 24 h; 89%, 72 h).

$^1\text{H NMR}$  ( $\text{CDCl}_3$ , 500 MHz):  $\delta = 7.62$  (d,  $J = 7.9$  Hz, 2H), 7.43 (d,  $J = 7.7$  Hz, 2H), 4.93 (t,  $J = 7.5$  Hz, 1H), 4.09 (q,  $J = 8.0$  Hz, 1H), 3.96 (q,  $J = 7.2$  Hz, 1H), 2.37 (m, 1H), 2.01 (m, 2H), 1.74 (m, 1H).

$^{13}\text{C NMR}$  (126 MHz,  $\text{CDCl}_3$ ):  $\delta = 149.4$ , 132.3, 126.3, 119.1, 110.9, 79.9, 69.1, 34.9, 26.1.

Characterization data matched that reported in the literature.<sup>2</sup>

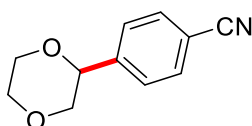

**4-(1,4-Dioxan-2-yl)benzonitrile (5):** obtained as a white semi-solid (22%, 96 h).

$^1\text{H NMR}$  ( $\text{CDCl}_3$ , 500 MHz):  $\delta = 7.65$  (d,  $J = 8.0$  Hz, 2H), 7.47 (d,  $J = 8.0$  Hz, 2H), 4.68 (dd,  $J = 10.2$ , 2.8 Hz, 1H), 3.89 (m, 4H), 3.73 (m, 1H), 3.38 (m, 1H).

$^{13}\text{C NMR}$  (126 MHz,  $\text{CDCl}_3$ )  $\delta = 143.6$ , 132.4, 126.9, 118.8, 112.0, 77.4, 72.2, 67.1, 66.5.

Characterization data matched that reported in the literature.<sup>3</sup>

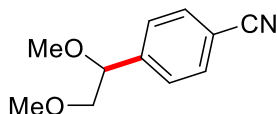

**4-(1,2-Dimethoxyethyl)benzonitrile (6):** obtained as an oil (91%, 48 h).

$^1\text{H NMR}$  ( $\text{CDCl}_3$ , 500 MHz):  $\delta = 7.66$  (d,  $J = 8.2$  Hz, 2H), 7.46 (d,  $J = 8.2$  Hz, 2H), 4.42 (dd,  $J = 7.2$ , 4.0 Hz, 1H), 3.57 (dd,  $J = 10.3$ , 7.3 Hz, 1H), 3.44 (dd,  $J = 10.4$ , 4.0 Hz, 1H), 3.37 (s, 3H), 3.31 (s, 3H).

$^{13}\text{C NMR}$  (126 MHz,  $\text{CDCl}_3$ )  $\delta = 144.8$ , 132.5, 127.8, 118.8, 111.9, 82.5, 76.6, 59.5, 57.6.

IR:  $\nu = 2931$ , 2893, 2827, 2227, 1609, 1587, 1513, 1451, 1352, 1286, 1192, 1169, 1098, 1073, 1034, 869, 838, 584, 569, 549  $\text{cm}^{-1}$ .

HRMS: (ESI)  $m/z$  calc. for  $\text{C}_{11}\text{H}_{14}\text{NO}_2$  (M+H) 192.1025, found 192.1019.

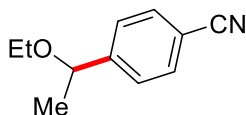

**4-(1-Ethoxyethyl)benzonitrile (7):** obtained as a colorless oil (56%, 72 h).

$^1\text{H NMR}$  ( $\text{CDCl}_3$ , 500 MHz):  $\delta = 7.63$  (d,  $J = 8.3$  Hz, 2H), 7.42 (d,  $J = 8.2$  Hz, 2H), 4.44 (q,  $J = 6.5$  Hz, 1H), 3.36 (m, 2H), 1.41 (dd,  $J = 6.5$ , 1.4 Hz, 3H), 1.20 (td,  $J = 7.0$ , 1.4 Hz, 3H).

$^{13}\text{C NMR}$  (126 MHz,  $\text{CDCl}_3$ ):  $\delta = 150.1$ , 132.5, 126.8, 119.1, 111.2, 77.3, 64.6, 24.2, 15.5.

IR:  $\nu = 2977$ , 2872, 2229, 1609, 1371, 1208, 1100, 1010, 838, 573  $\text{cm}^{-1}$ .

HRMS: (ESI)  $m/z$  calc. for  $C_{11}H_{14}NO$  (M+H) 176.1075, found 176.1061.

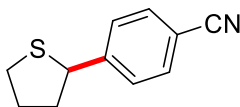

**4-(Tetrahydrothiophen-2-yl)benzonitrile (9):** obtained as a colorless oil (32%, 72 h).

$^1H$  NMR ( $CDCl_3$ , 500 MHz):  $\delta$  = 7.59 (d,  $J$  = 8.3 Hz, 2H), 7.52 (d,  $J$  = 8.4 Hz, 2H), 4.52 (dd,  $J$  = 8.5, 6.4 Hz, 1H), 3.16 (m, 1H), 3.03 (m, 1H), 2.42 (m, 1H), 2.26 (m, 1H), 2.02 (m, 1H), 1.90 (m, 1H).

$^{13}C$  NMR (126 MHz,  $CDCl_3$ )  $\delta$  = 149.1, 132.4, 128.6, 119.0, 110.9, 52.4, 40.6, 33.8, 31.2.

Characterization data matched that reported in the literature.<sup>4</sup>

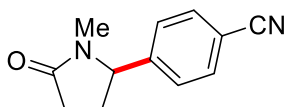

**4-(1-Methyl-5-oxopyrrolidin-2-yl)benzonitrile (10):** isolated as a light brown oil (81%, 96 h); mixture of secondary arylation product (major) with primary *N*-Me arylation isomer (8.3:1).

$^1H$  NMR ( $CDCl_3$ , 500 MHz):  $\delta$  = 7.72 (d,  $J$  = 10 Hz, 2H), 7.35 (d,  $J$  = 10 Hz, 2H), 4.61 (dd,  $J$  = 5, 5 Hz, 1H), 2.72 (s, 3H), 2.60-2.47 (m, 3H), 1.87-1.83 (m, 1H).

$^{13}C$  NMR (126 MHz,  $CDCl_3$ ):  $\delta$  175.5, 146.7, 133.0, 127.1, 118.4, 112.0, 64.1, 29.8, 28.4, 28.2.

Characterization data matched that reported in the literature.<sup>5</sup>

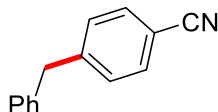

**4-Benzylbenzonitrile (11):** obtained as a white solid (87%, 72 h), mp = 47-49 °C.

$^1H$  NMR ( $CDCl_3$ , 500 MHz):  $\delta$  = 7.57 (d,  $J$  = 8.0 Hz, 2H), 7.30 (m, 5H), 7.17 (d,  $J$  = 7.4 Hz, 2H), 4.09 (s, 2H).

$^{13}C$  NMR (126 MHz,  $CDCl_3$ )  $\delta$  = 146.9, 139.5, 132.5, 129.8, 129.1, 128.9, 126.8, 119.2, 110.2, 42.1.

Characterization data matched that reported in the literature.<sup>1</sup>

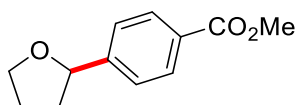

**Methyl 4-(Tetrahydrofuran-2-yl)benzoate (13):** obtained as a colorless oil (75%, 48 h).

$^1H$  NMR ( $CDCl_3$ , 500 MHz):  $\delta$  = 8.00 (d,  $J$  = 8.3 Hz, 2H), 7.40 (d,  $J$  = 8.2 Hz, 2H), 4.94 (t,  $J$  = 7.2 Hz, 1H), 4.10 (m, 1H), 3.96 (q,  $J$  = 7.0 Hz, 1H), 3.91 (s, 3H), 2.36 (m, 1H), 2.01 (m, 2H), 1.78 (m, 1H).

$^{13}C$  NMR (126 MHz,  $CDCl_3$ ):  $\delta$  = 167.2, 149.1, 129.8, 126.3, 125.6, 80.3, 69.0, 52.2, 34.9, 26.1.

Characterization data matched that reported in the literature.<sup>6</sup>

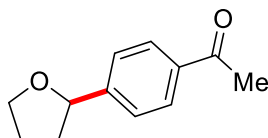

**1-(4-(Tetrahydrofuran-2-yl)phenyl)ethan-1-one (14):** product obtained with a trace of 4,4'-dimethoxybenzophenone (xx:DMBP = 11.5:1.0 by <sup>1</sup>H NMR, 64%, 48 h).

<sup>1</sup>H NMR (CDCl<sub>3</sub>, 500 MHz):  $\delta$  = 7.92 (d,  $J$  = 8.3 Hz, 2H), 7.42 (d,  $J$  = 8.4 Hz, 2H), 4.95 (t,  $J$  = 7.2 Hz, 1H), 4.10 (q,  $J$  = 6.9 Hz, 1H), 3.96 (q,  $J$  = 8.0, 1H) 2.59 (s, 3H), 2.37 (m, 1H), 2.01 (m, 2H), 1.77 (m, 1H).

<sup>13</sup>C NMR (126 MHz, CDCl<sub>3</sub>):  $\delta$  = 198.0, 149.3, 136.2, 128.6, 125.7, 80.3, 69.0, 34.9, 26.8, 26.1.

Characterization data matched that reported in the literature.<sup>2</sup>

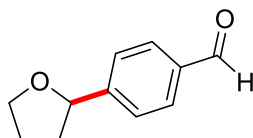

**4-(Tetrahydrofuran-2-yl)benzaldehyde (15):** using standard conditions, obtained as an inseparable mixture with 4,4'-dimethoxybenzophenone (71%, 48 h); in the absence of DMBP, obtained a clear oil (57%, 72 h) .

<sup>1</sup>H NMR (CDCl<sub>3</sub>, 500 MHz):  $\delta$  = 10.00 (s, 1H), 7.85 (d,  $J$  = 8.3 Hz, 2 H), 7.50 (d,  $J$  = 7.9 Hz, 2H), 4.97 (t,  $J$  = 7.2 Hz, 1H), 4.12 (q, 1H), 3.98 (q, 1H), 2.39 (m, 1H), 2.02 (m, 2H), 1.78 (m, 1H).

<sup>13</sup>C NMR (126 MHz, CDCl<sub>3</sub>):  $\delta$  = 192.2, 151.0, 135.6, 130.0, 126.2, 80.3, 69.1, 34.9, 26.1

IR: 2975, 2874, 1699, 1603, 1577, 1509, 1418, 1305, 1285, 1209, 1167, 1114, 1061, 1028, 927, 829, 771 cm<sup>-1</sup>.

MS: (ESI) m/z calc. for C<sub>11</sub>H<sub>12</sub>O<sub>2</sub> (M<sup>+</sup>) 176.0837, found 176.0827.

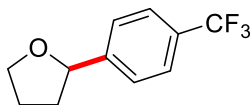

**2-(4-(Trifluoromethyl)phenyl)tetrahydrofuran (16):** using standard conditions, obtained a clear oil (72% NMR yield, 63% isolated yield, 72 h); in the absence of DMBP, obtained a clear oil (59%, 72 h).

<sup>1</sup>H NMR (CDCl<sub>3</sub>, 500 MHz):  $\delta$  = 7.58 (d,  $J$  = 8.1 Hz, 2H), 7.44 (d,  $J$  = 8.0 Hz, 2H), 4.95 (t,  $J$  = 7.2 Hz, 1H), 4.11 (dt,  $J$  = 8.4, 6.8 Hz, 1H), 3.96 (dt,  $J$  = 8.3, 7.0 Hz, 1H), 2.37 (dq,  $J$  = 13.2, 6.7 Hz, 1H), 2.01 (m, 2H), 1.77 (dq,  $J$  = 12.3, 7.8 Hz, 1H).

<sup>13</sup>C NMR (126 MHz, CDCl<sub>3</sub>):  $\delta$  = 147.9, 129.6, 125.9, 125.4 (q,  $J$  = 3.9 Hz), 123.3, 80.1, 69.0, 34.9, 26.1.

<sup>19</sup>F NMR (CDCl<sub>3</sub>, 470.8 MHz):  $\delta$  = -62.4.

Characterization data matched that reported in the literature.<sup>3</sup>

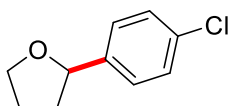

**2-(4-Chlorophenyl)tetrahydrofuran (17):** using standard conditions, obtained a clear oil (52%, 72 h); in the absence of DMBP, obtained a clear oil (48%, 72 h).

$^1\text{H NMR}$  ( $\text{CDCl}_3$ , 500 MHz):  $\delta = 7.34 - 7.22$  (m, 4H), 4.86 (t,  $J = 7.2$  Hz, 1H), 4.08 (dt,  $J = 8.4$ , 6.8 Hz, 1H), 3.93 (dt,  $J = 8.3$ , 6.9 Hz, 1H), 2.32 (m, 1H), 2.00 (m, 2H), 1.75 (m, 1H).

$^{13}\text{C NMR}$  (126 MHz,  $\text{CDCl}_3$ ):  $\delta = 142.2$ , 132.9, 128.5, 127.1, 80.1, 68.9, 34.8, 26.1.

Characterization data matched that reported in the literature.<sup>3</sup>

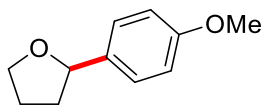

**2-(4-Methoxyphenyl)tetrahydrofuran (18):** obtained as a colorless oil (76%, 72 h).

$^1\text{H NMR}$  ( $\text{CDCl}_3$ , 500 MHz):  $\delta = 7.26$  (d,  $J = 8.6$  Hz, 2H), 6.87 (d,  $J = 8.7$  Hz, 2H), 4.83 (t,  $J = 7.2$  Hz, 1H), 4.12 - 4.03 (m, 1H), 3.91 (td,  $J = 8.1$ , 6.3 Hz, 1H), 3.80 (s, 3H), 2.32 - 2.21 (m, 1H), 2.07 - 1.93 (m, 2H), 1.79 (m, 1H).

$^{13}\text{C NMR}$  (126 MHz,  $\text{CDCl}_3$ ):  $\delta = 158.9$ , 135.5, 127.1, 113.8, 80.6, 68.6, 55.4, 34.6, 26.2.

Characterization data matched that reported in the literature.<sup>3</sup>

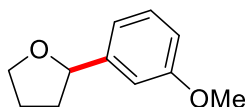

**2-(3-Methoxyphenyl)tetrahydrofuran (19):** obtained as a colorless oil (62%, 72 h).

$^1\text{H NMR}$  ( $\text{CDCl}_3$ , 500 MHz):  $\delta = 7.24$  (d,  $J = 8.1$  Hz, 1H), 6.91 (d,  $J = 5.5$  Hz, 2H), 6.79 (dd,  $J = 8.1$ , 2.4 Hz, 1H), 4.88 (t,  $J = 7.1$  Hz, 1H), 4.09 (q,  $J = 7.1$  Hz, 1H), 3.93 (q,  $J = 8.0$  Hz, 1H), 3.81 (s, 3H), 2.37 - 2.27 (m, 1H), 2.06 - 1.94 (m, 2H), 1.86 - 1.75 (m, 1H).

$^{13}\text{C NMR}$  (126 MHz,  $\text{CDCl}_3$ ):  $\delta = 159.8$ , 145.4, 129.4, 118.1, 112.7, 111.2, 80.6, 68.8, 55.4, 34.7, 26.1.

Characterization data matched that reported in the literature.<sup>7</sup>

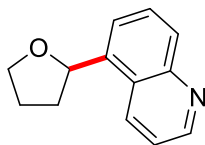

**5-(Tetrahydrofuran-2-yl)quinoline (20):** obtained as a pale yellow oil (54%, 48 h).

$^1\text{H NMR}$  ( $\text{CDCl}_3$ , 500 MHz):  $\delta = 8.92$  (d,  $J = 3.8$  Hz, 1H), 8.37 (d,  $J = 8.5$  Hz, 1H), 8.02 (d,  $J = 9.2$  Hz, 1H), 7.68 (d,  $J = 7.2$  Hz, 2H), 7.41 (dd,  $J = 8.5$ , 4.1 Hz, 1H), 5.56 (t,  $J = 7.1$  Hz, 1H), 4.22 (q,  $J = 7.8$ , 1H), 4.03 (q,  $J = 7.5$  Hz, 1H), 2.51 (m, 1H), 2.08 (m, 2H), 1.92 (m, 1H).

$^{13}\text{C NMR}$  (126 MHz,  $\text{CDCl}_3$ ):  $\delta = 150.0$ , 148.7, 139.7, 132.2, 129.2, 129.0, 125.8, 122.8, 120.8, 77.8, 68.9, 33.9, 26.1.

IR:  $\nu = 3063, 2974, 2869, 1611, 1595, 1573, 1500, 1469, 1372, 1317, 1150, 1072, 1048, 1007, 928, 843, 827, 802, 748, 558 \text{ cm}^{-1}$ .

HRMS: (ESI)  $m/z$  calc. for  $\text{C}_{14}\text{H}_{14}\text{NO}$  (M+H) 200.1075, found 200.1039.

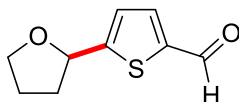

**5-(Tetrahydrofuran-2-yl)thiophene-2-carbaldehyde (21)**: obtained as a pale yellow oil (43%, 48 h).

$^1\text{H}$  NMR ( $\text{CDCl}_3$ , 500 MHz):  $\delta = 9.85$  (s, 1H), 7.64 (d,  $J = 3.8$  Hz, 1H), 7.03 (d,  $J = 3.6$  Hz, 1H), 5.18 (t,  $J = 6.6$  Hz, 1H), 4.08 (m, 1H), 3.93 (m, 1H), 2.39 (m, 1H), 2.11 – 1.87 (m, 3H).

$^{13}\text{C}$  NMR (126 MHz,  $\text{CDCl}_3$ ):  $\delta = 183.1, 159.4, 142.3, 136.8, 124.3, 77.4, 69.0, 35.0, 26.0$ .

IR:  $\nu = 2926, 1710, 1666, 1528, 1461, 1228, 1202, 1057, 923, 815, 753, 670 \text{ cm}^{-1}$ .

HRMS: (ESI)  $m/z$  calc. for  $\text{C}_9\text{H}_{10}\text{O}_2\text{S}$  ( $\text{M}^+$ ) 182.0402, found 182.0398.

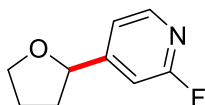

**2-Fluoro-4-(tetrahydrofuran-2-yl)pyridine (22)**: obtained as a colorless oil (86%, 72 h).

$^1\text{H}$  NMR ( $\text{CDCl}_3$ , 500 MHz):  $\delta = 8.14$  (d,  $J = 5.2$  Hz, 1H), 7.10 (d,  $J = 5.1$  Hz, 1H), 6.91 (s, 1H), 4.92 (t,  $J = 7.2$  Hz, 1H), 4.08 (q,  $J = 7.3$  Hz, 1H), 3.96 (q,  $J = 7.5$  Hz, 1H), 2.40 (m, 1H), 1.99 (m, 2H), 1.81 (m, 1H).

$^{13}\text{C}$  NMR (126 MHz,  $\text{CDCl}_3$ ):  $\delta = 147.7, 147.6, 118.4, 106.3, 106.0, 78.9, 69.2, 34.4, 25.9$

$^{19}\text{F}$  NMR ( $\text{CDCl}_3$ , 470.8 MHz):  $\delta = -68.2$ .

IR:  $\nu = 2979, 2874, 1614, 1568, 1481, 1405, 1293, 1274, 1067, 877, 842 \text{ cm}^{-1}$ .

HRMS: (ESI)  $m/z$  calc. for  $\text{C}_9\text{H}_{11}\text{FNO}$  (M+H) 168.0825, found 168.0822.

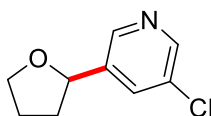

**3-Chloro-5-(tetrahydrofuran-2-yl)pyridine (23)**: obtained as a colorless oil (62%, 72 h).

$^1\text{H}$  NMR ( $\text{CDCl}_3$ , 500 MHz):  $\delta = 8.45$  (d,  $J = 2.4$  Hz, 1H), 8.42 (d,  $J = 1.8$  Hz, 1H), 7.67 (s, 1H), 4.90 (t,  $J = 7.2$  Hz, 1H), 4.08 (m, 1H), 3.94 (m, 1H), 2.38 (m, 1H), 2.02 (m, 2H), 1.78 (m, 1H).

$^{13}\text{C}$  NMR (126 MHz,  $\text{CDCl}_3$ ):  $\delta = 147.6, 145.5, 140.6, 133.2, 132.1, 77.8, 69.0, 34.7, 26.1$ .

IR:  $\nu = 2977, 2872, 1582, 1559, 1440, 1421, 1360, 1298, 1233, 1102, 1063, 1022, 925, 880, 704 \text{ cm}^{-1}$ .

HRMS: (ESI)  $m/z$  calc. for  $\text{C}_9\text{H}_{11}\text{ClNO}$  (M+H) 184.0524, found 184.0523.

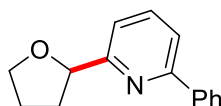



**2-Phenyl-6-(tetrahydrofuran-2-yl)pyridine (24)**: obtained as a colorless oil (49%, 72 h).

$^1\text{H}$  NMR ( $\text{CDCl}_3$ , 500 MHz):  $\delta$  = 8.01 (d,  $J$  = 7.3 Hz, 2H), 7.73 (t,  $J$  = 7.7 Hz, 1H), 7.59 (d,  $J$  = 7.8 Hz, 1H), 7.47 (t,  $J$  = 7.5 Hz, 2H), 7.40 (t,  $J$  = 6.8 Hz, 2H), 5.12 (t,  $J$  = 6.8 Hz, 1H), 4.14 (q,  $J$  = 6.9 Hz, 1H), 4.01 (q,  $J$  = 7.2 Hz, 1H), 2.47 (m, 1H), 2.15 (m, 1H), 2.00 (m, 2H).

$^{13}\text{C}$  NMR (126 MHz,  $\text{CDCl}_3$ ):  $\delta$  = 163.1, 156.7, 139.7, 137.3, 128.9, 128.8, 127.1, 118.9, 118.3, 81.7, 69.2, 33.1, 25.9.

IR:  $\nu$  = 3062, 2976, 2871, 1590, 1571, 1447, 1331, 1156, 1061, 1026, 922, 815, 762, 694, 623  $\text{cm}^{-1}$ .

HRMS: (ESI)  $m/z$  calc. for  $\text{C}_{15}\text{H}_{16}\text{NO}$  (M+H) 226.1232, found 226.1223.

## Spectral Data

<sup>1</sup>H NMR Spectrum of 4-(Tetrahydrofuran-2-yl)benzonitrile (2)

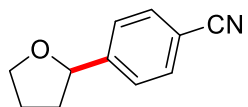

7.62  
7.61  
7.44  
7.42  
7.26  
7.26

4.95  
4.93  
4.92

4.10  
4.09  
3.97  
3.95

2.38  
2.37  
2.36  
2.03  
2.02  
2.01  
1.99  
1.76  
1.75  
1.74  
1.74  
1.73  
1.72

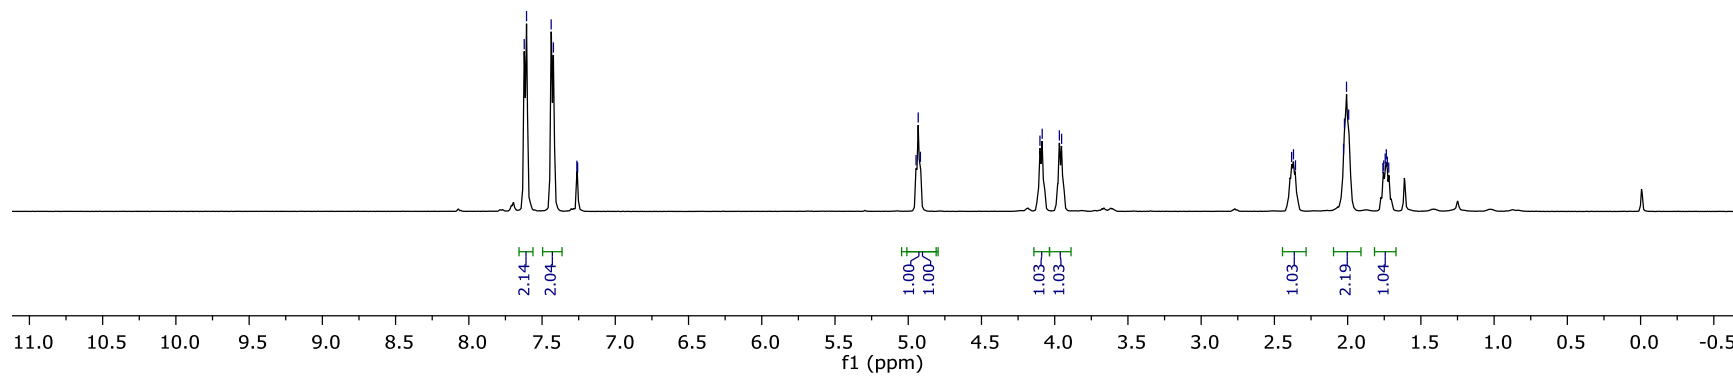

S11

<sup>13</sup>C NMR Spectrum of 4-(Tetrahydrofuran-2-yl)benzonitrile (2)



— 149.38 — 132.32 — 126.30 — 119.12 — 110.94 — 79.97 — 69.11 — 34.87 — 26.08

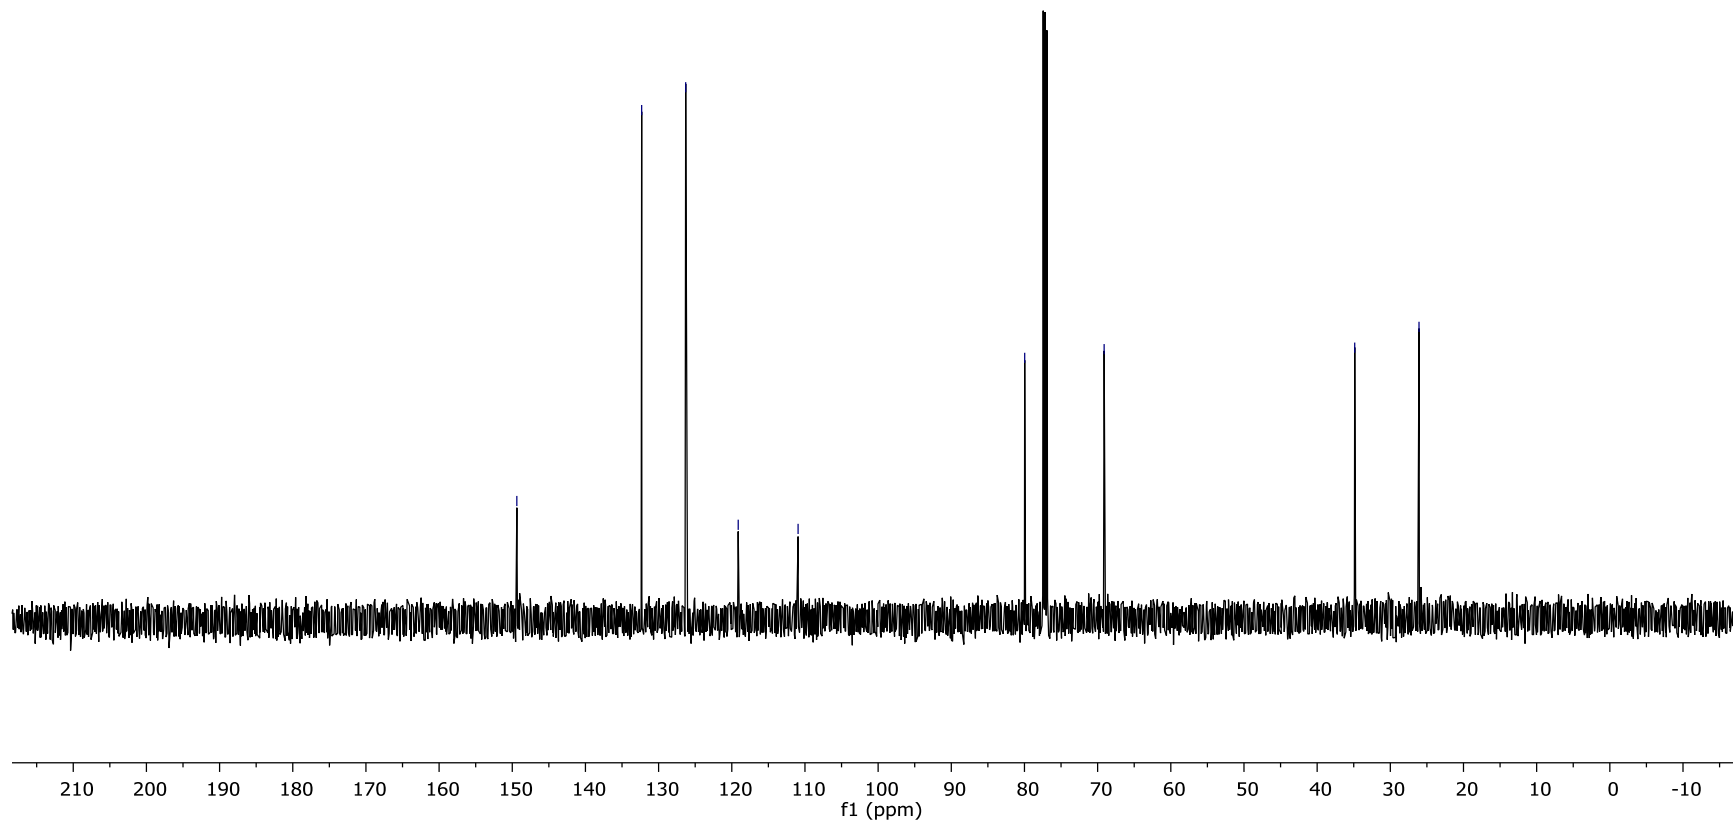

<sup>1</sup>H NMR Spectrum of 4-(1,4-Dioxan-2-yl)benzonitrile (5)

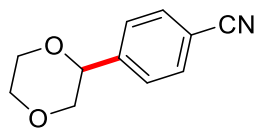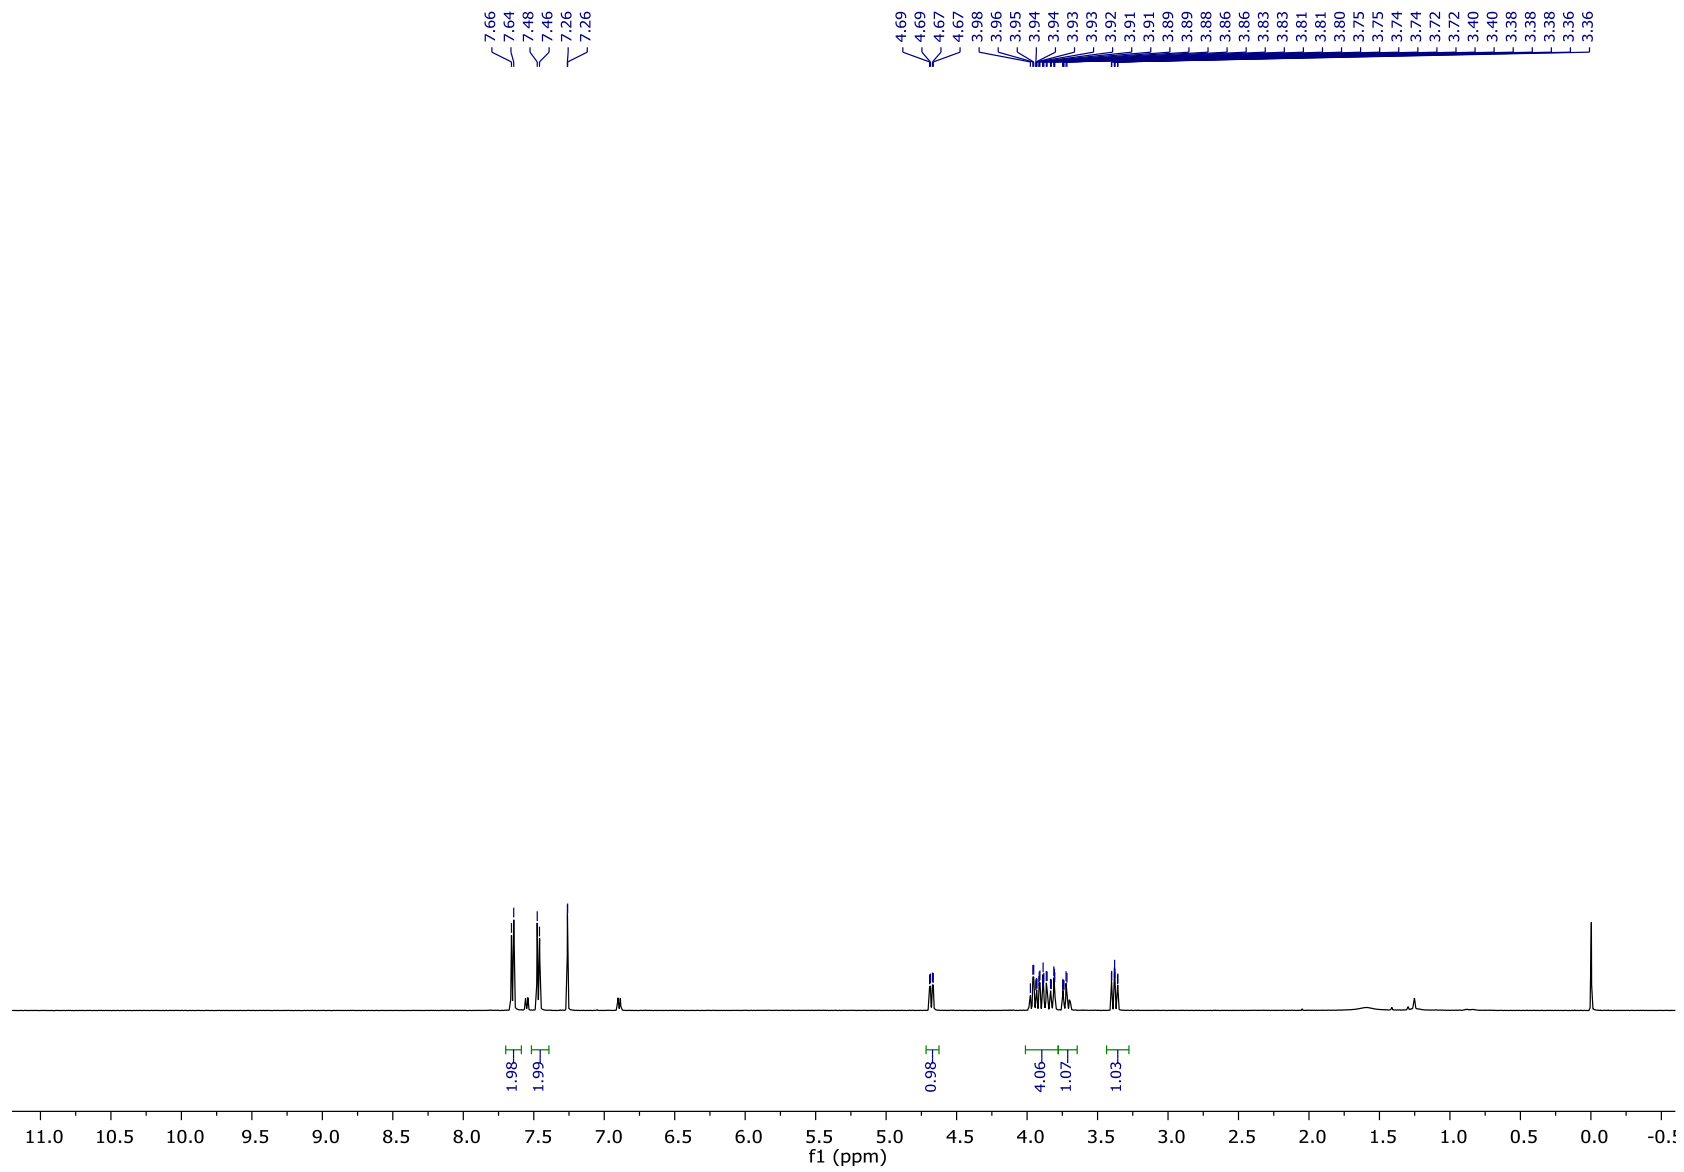

<sup>13</sup>C NMR Spectrum of 4-(1,4-Dioxan-2-yl)benzonitrile (5)

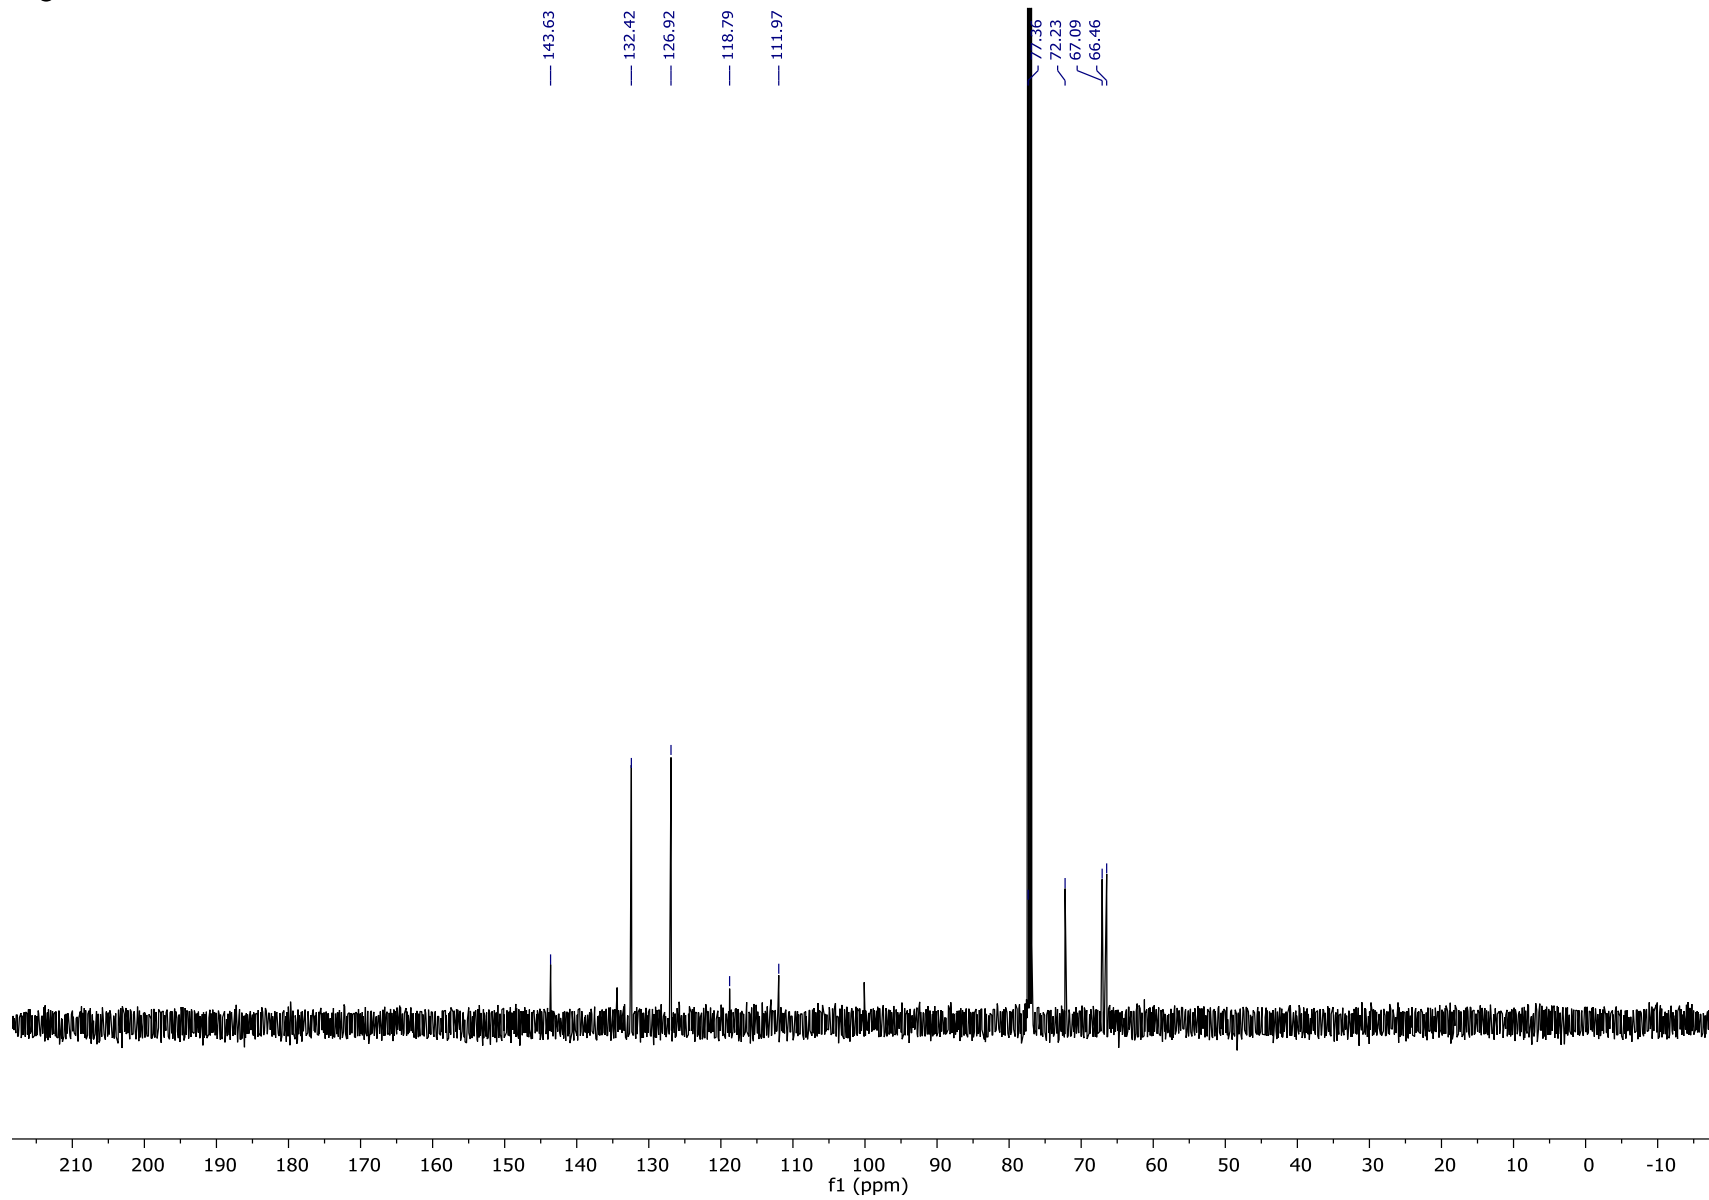

<sup>1</sup>H NMR Spectrum of 4-(1,2-Dimethoxyethyl)benzonitrile (6)

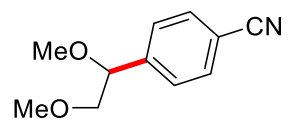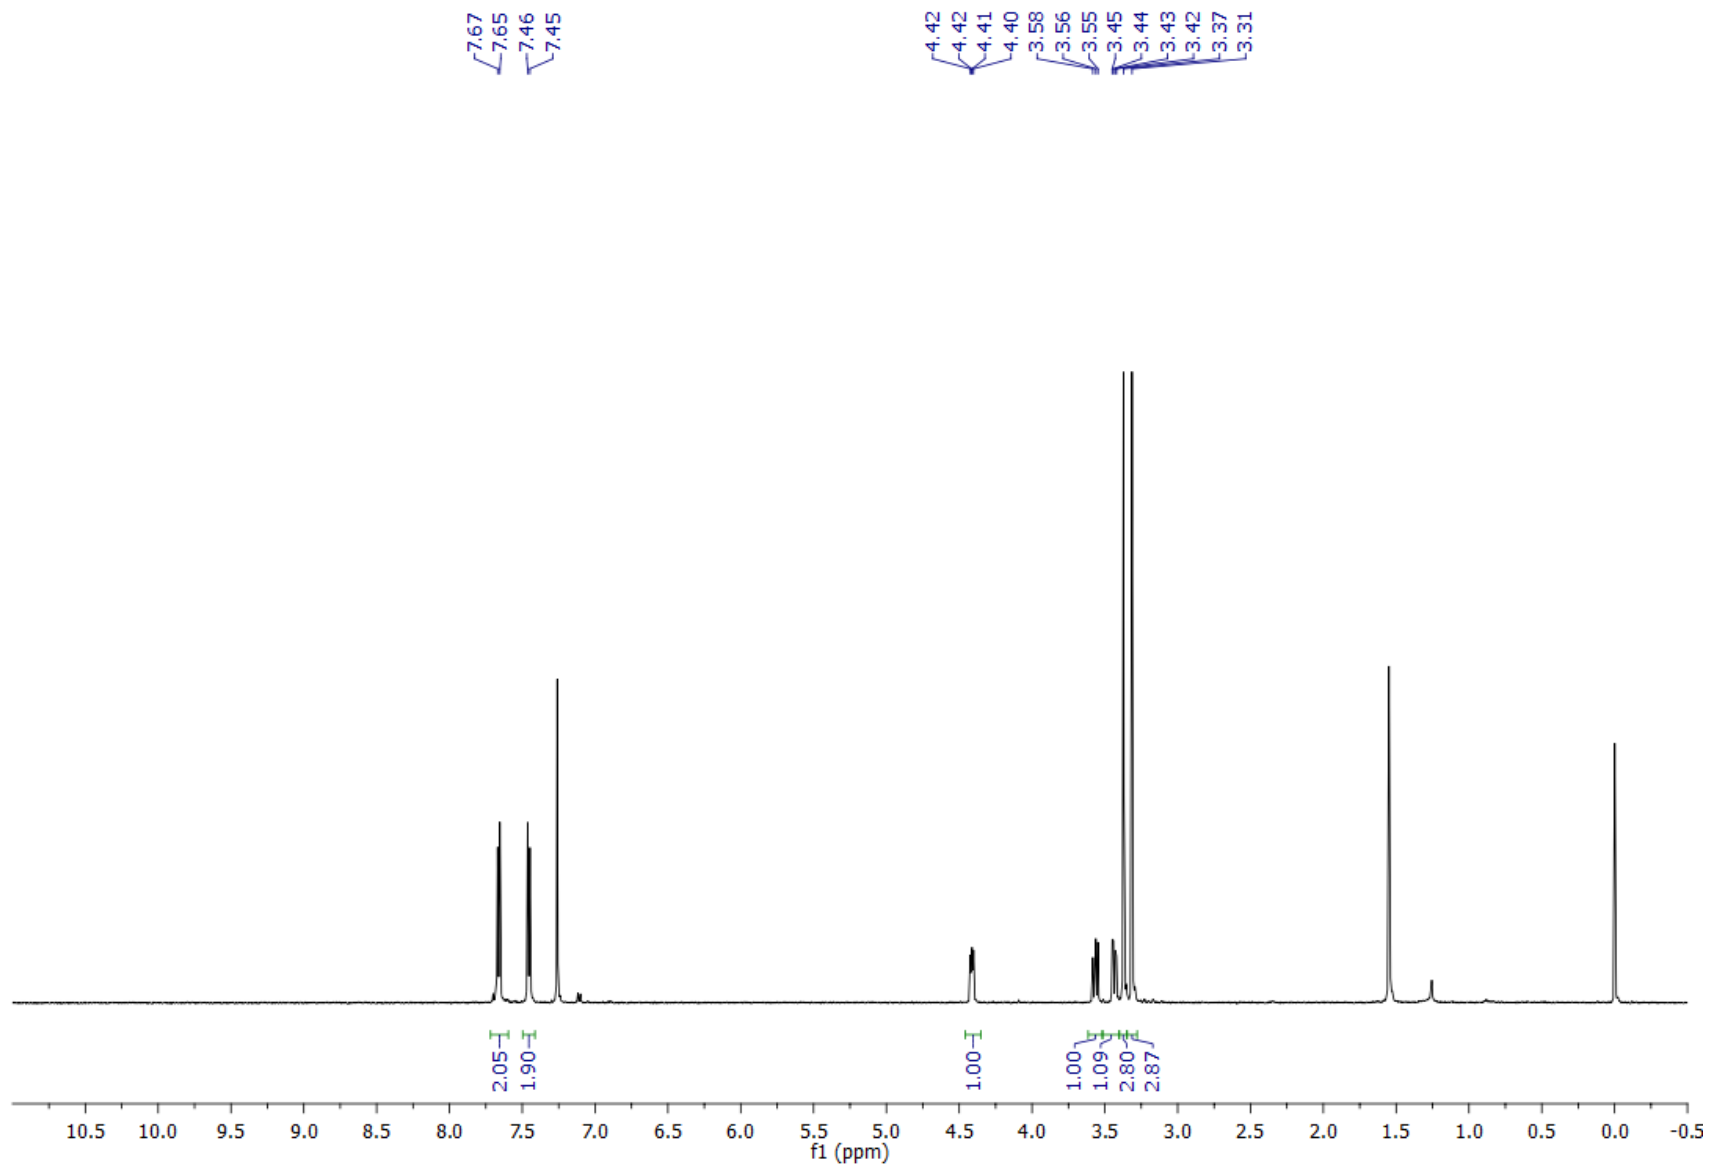

<sup>13</sup>C NMR Spectrum of 4-(1,2-Dimethoxyethyl)benzonitrile (6)

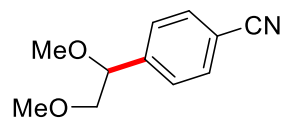

144.75  
134.32  
132.48  
127.83  
118.82  
116.50  
111.93  
82.45  
76.57  
59.49  
57.56

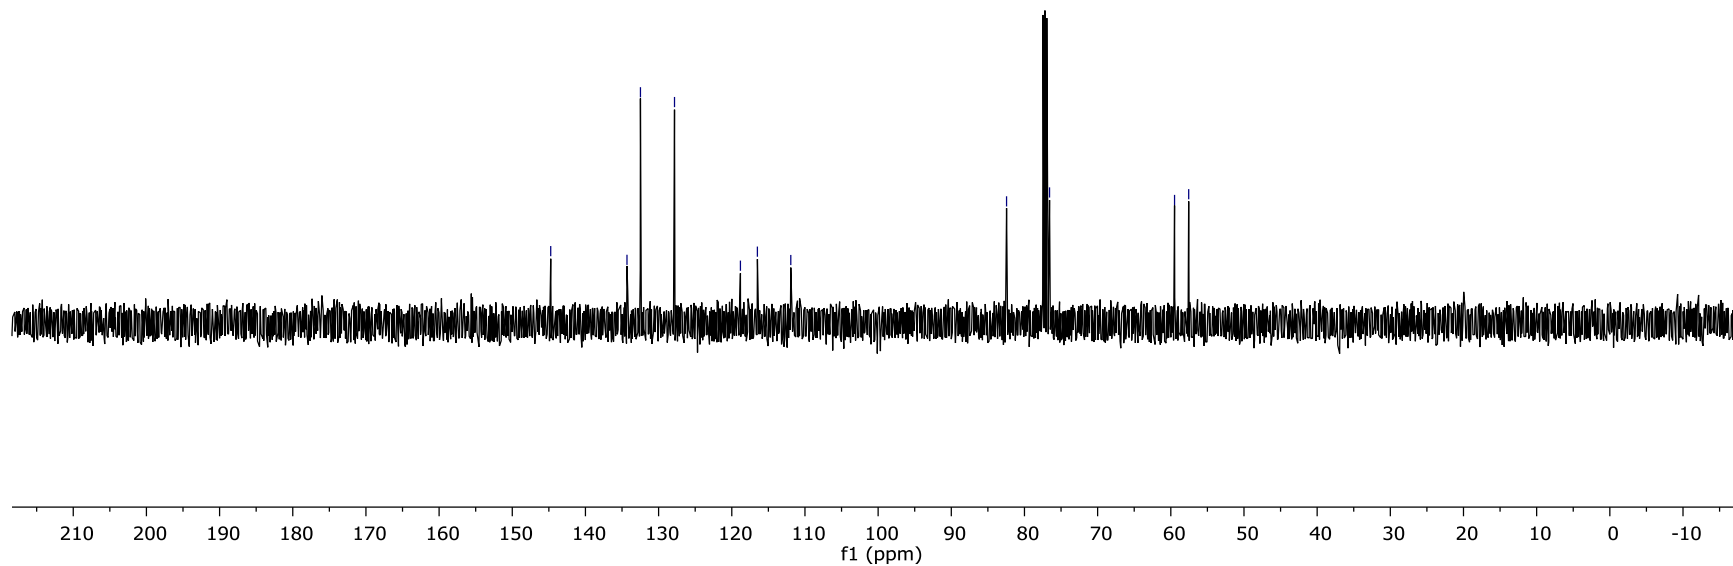



<sup>1</sup>H NMR Spectrum of 4-(1-Ethoxyethyl)benzonitrile (7)

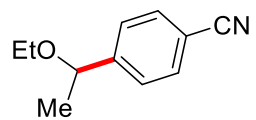

7.64  
7.64  
7.63  
7.63  
7.62  
7.62  
7.43  
7.43  
7.42  
7.42  
7.41  
7.41  
7.26  
7.26

4.45  
4.45  
4.44  
4.44  
3.41  
3.40  
3.39  
3.39  
3.38  
3.38  
3.34  
3.34  
3.33  
3.33  
3.31  
3.31

1.42  
1.42  
1.41  
1.40  
1.21  
1.21  
1.20  
1.19  
1.18  
1.18

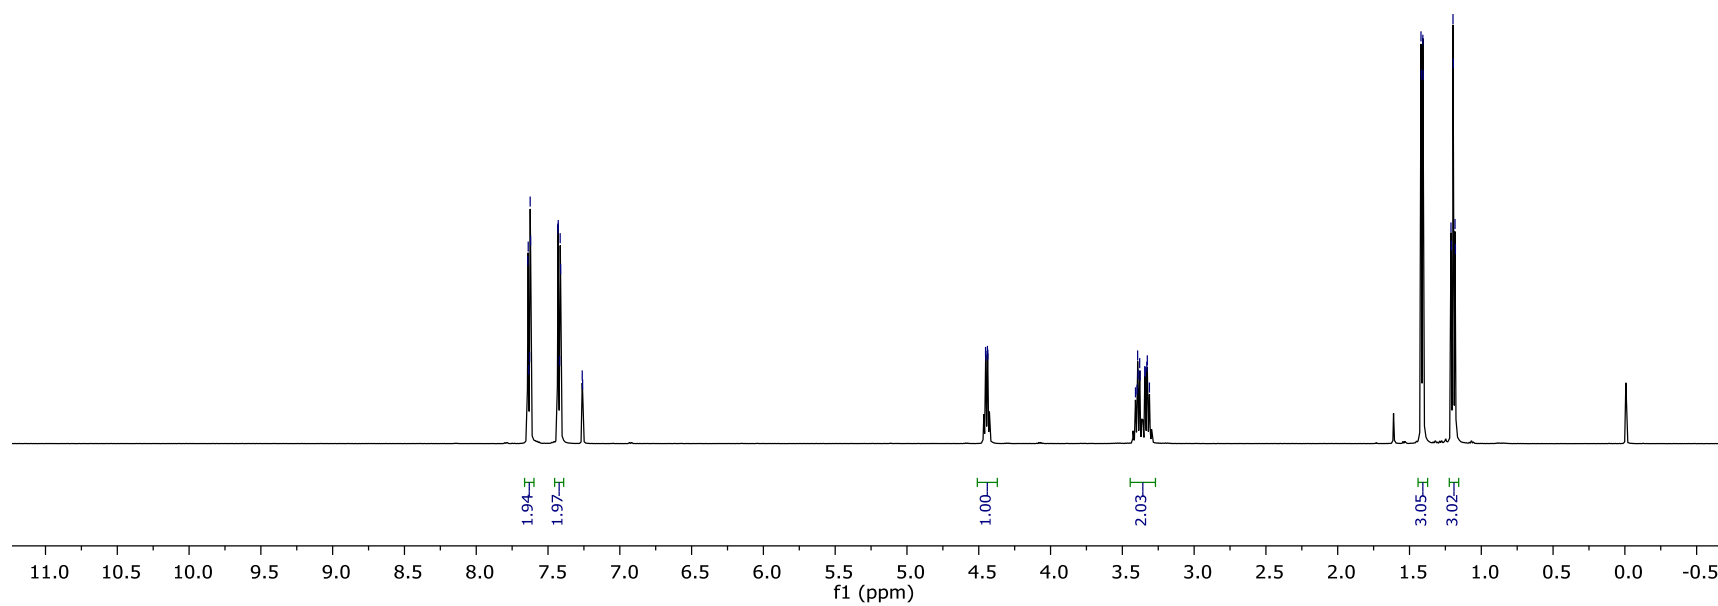

<sup>13</sup>C NMR Spectrum of 4-(1-Ethoxyethyl)benzonitrile (7)

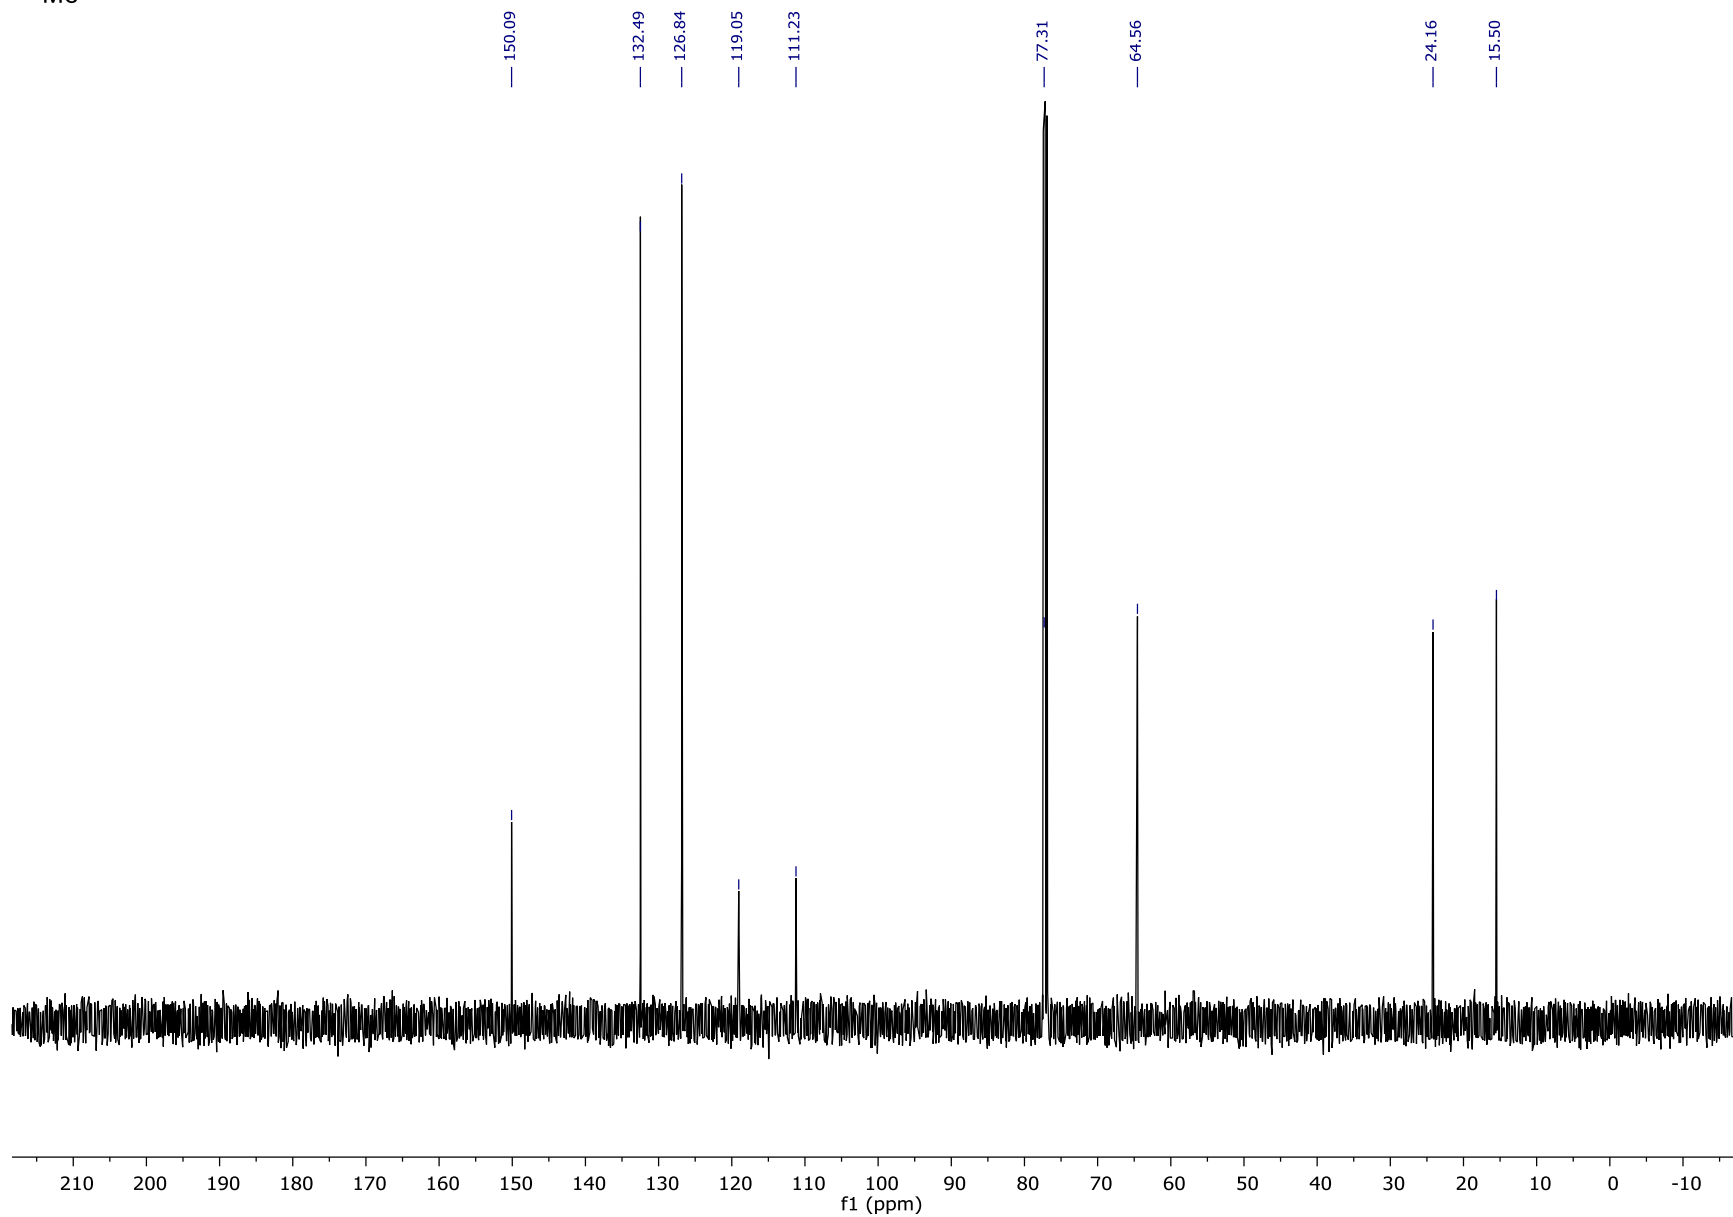

<sup>1</sup>H NMR Spectrum of 4-(Tetrahydrothiophen-2-yl)benzonitrile (9)

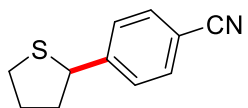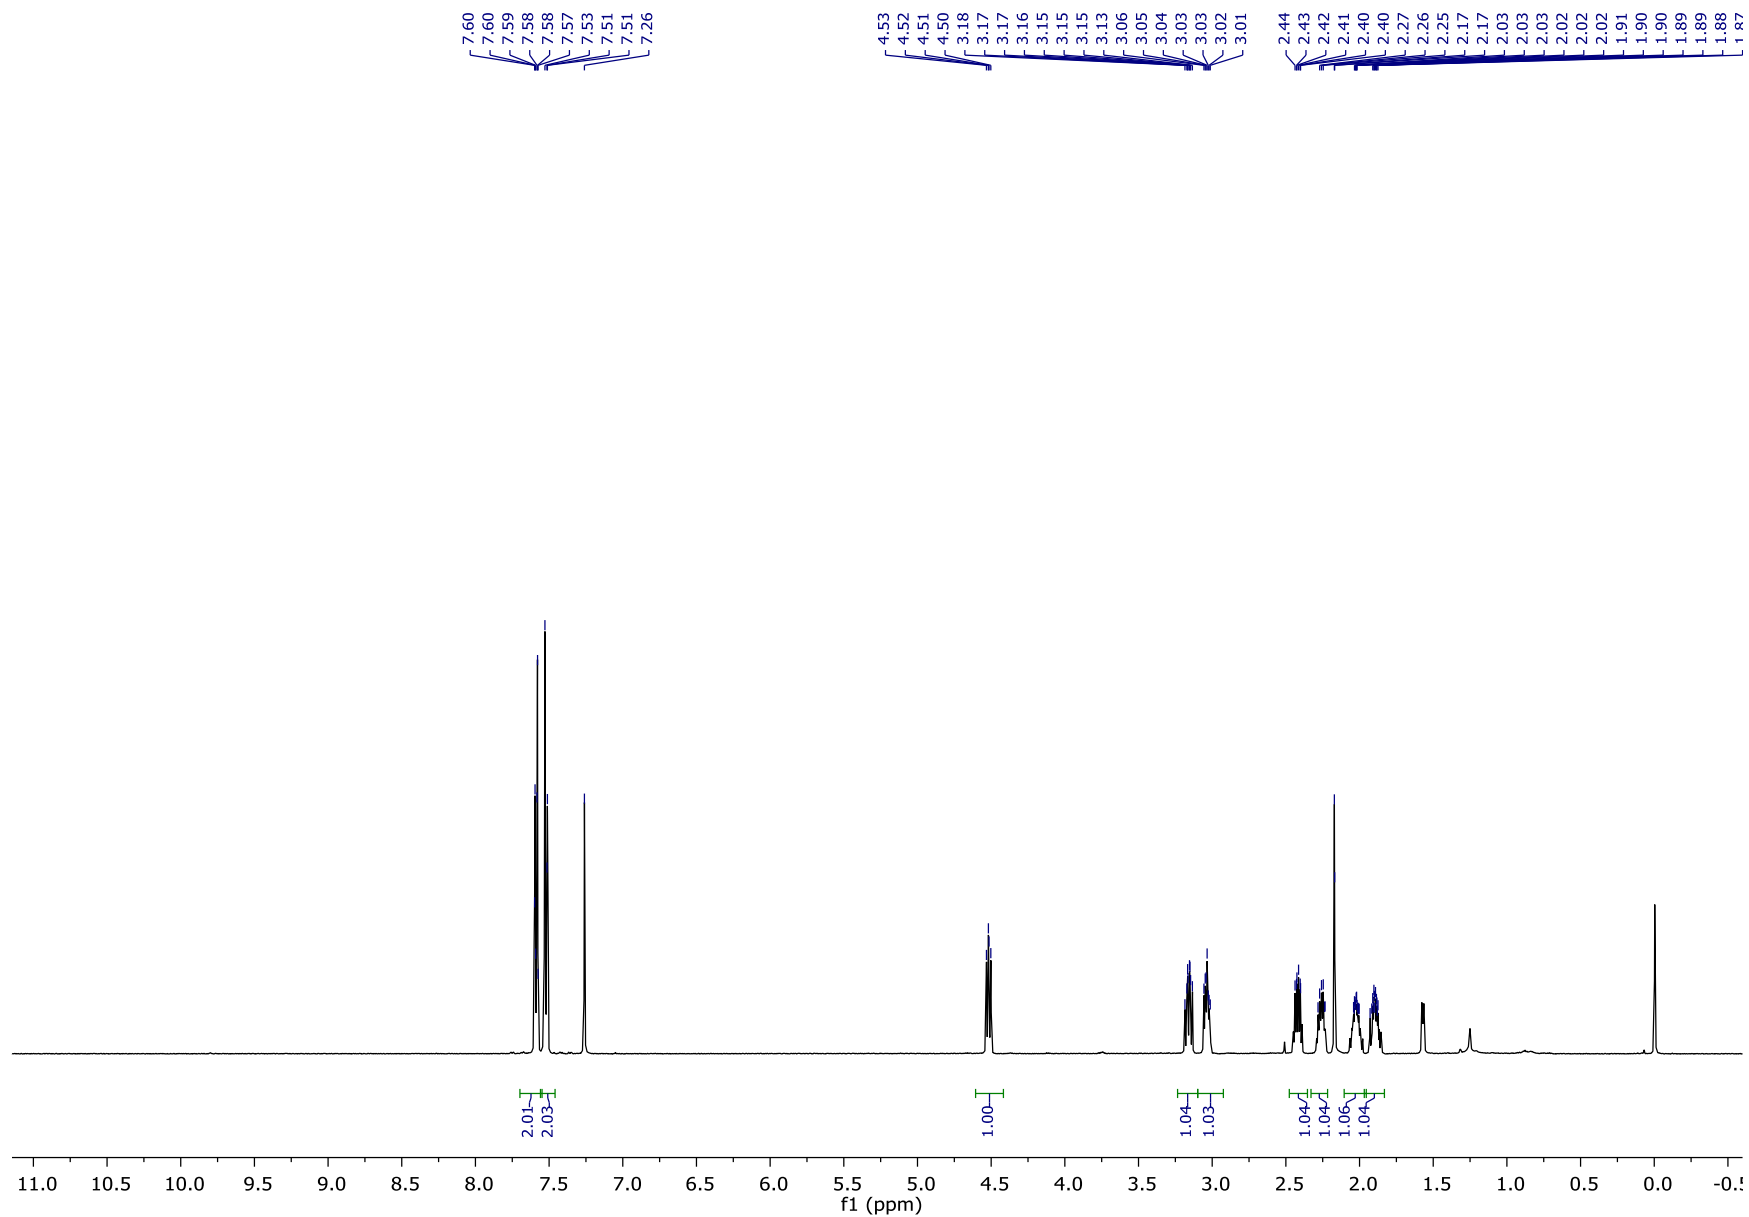

<sup>13</sup>C NMR Spectrum of 4-(Tetrahydrothiophen-2-yl)benzonitrile (9)

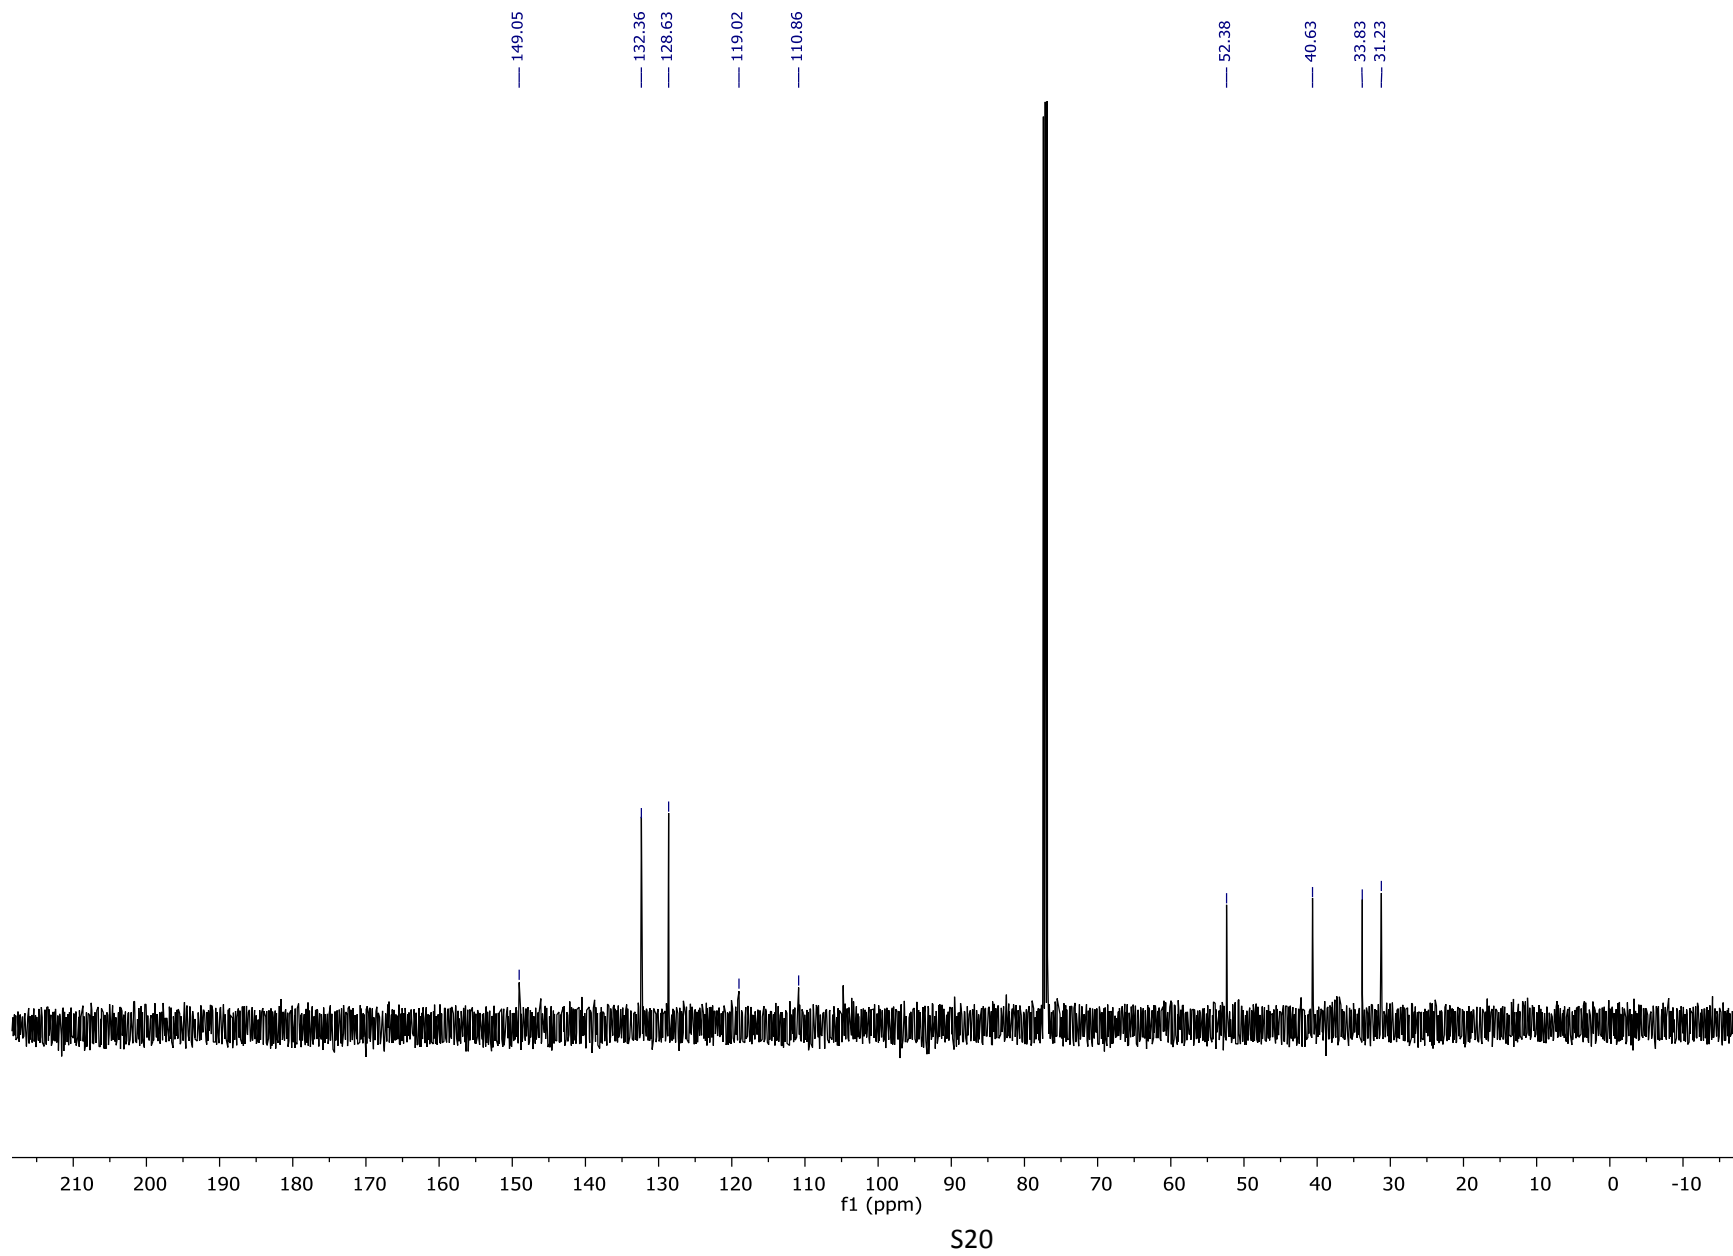

<sup>1</sup>H NMR Spectrum of 4-(1-Methyl-5-oxopyrrolidin-2-yl)benzonitrile (10)

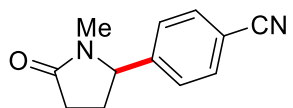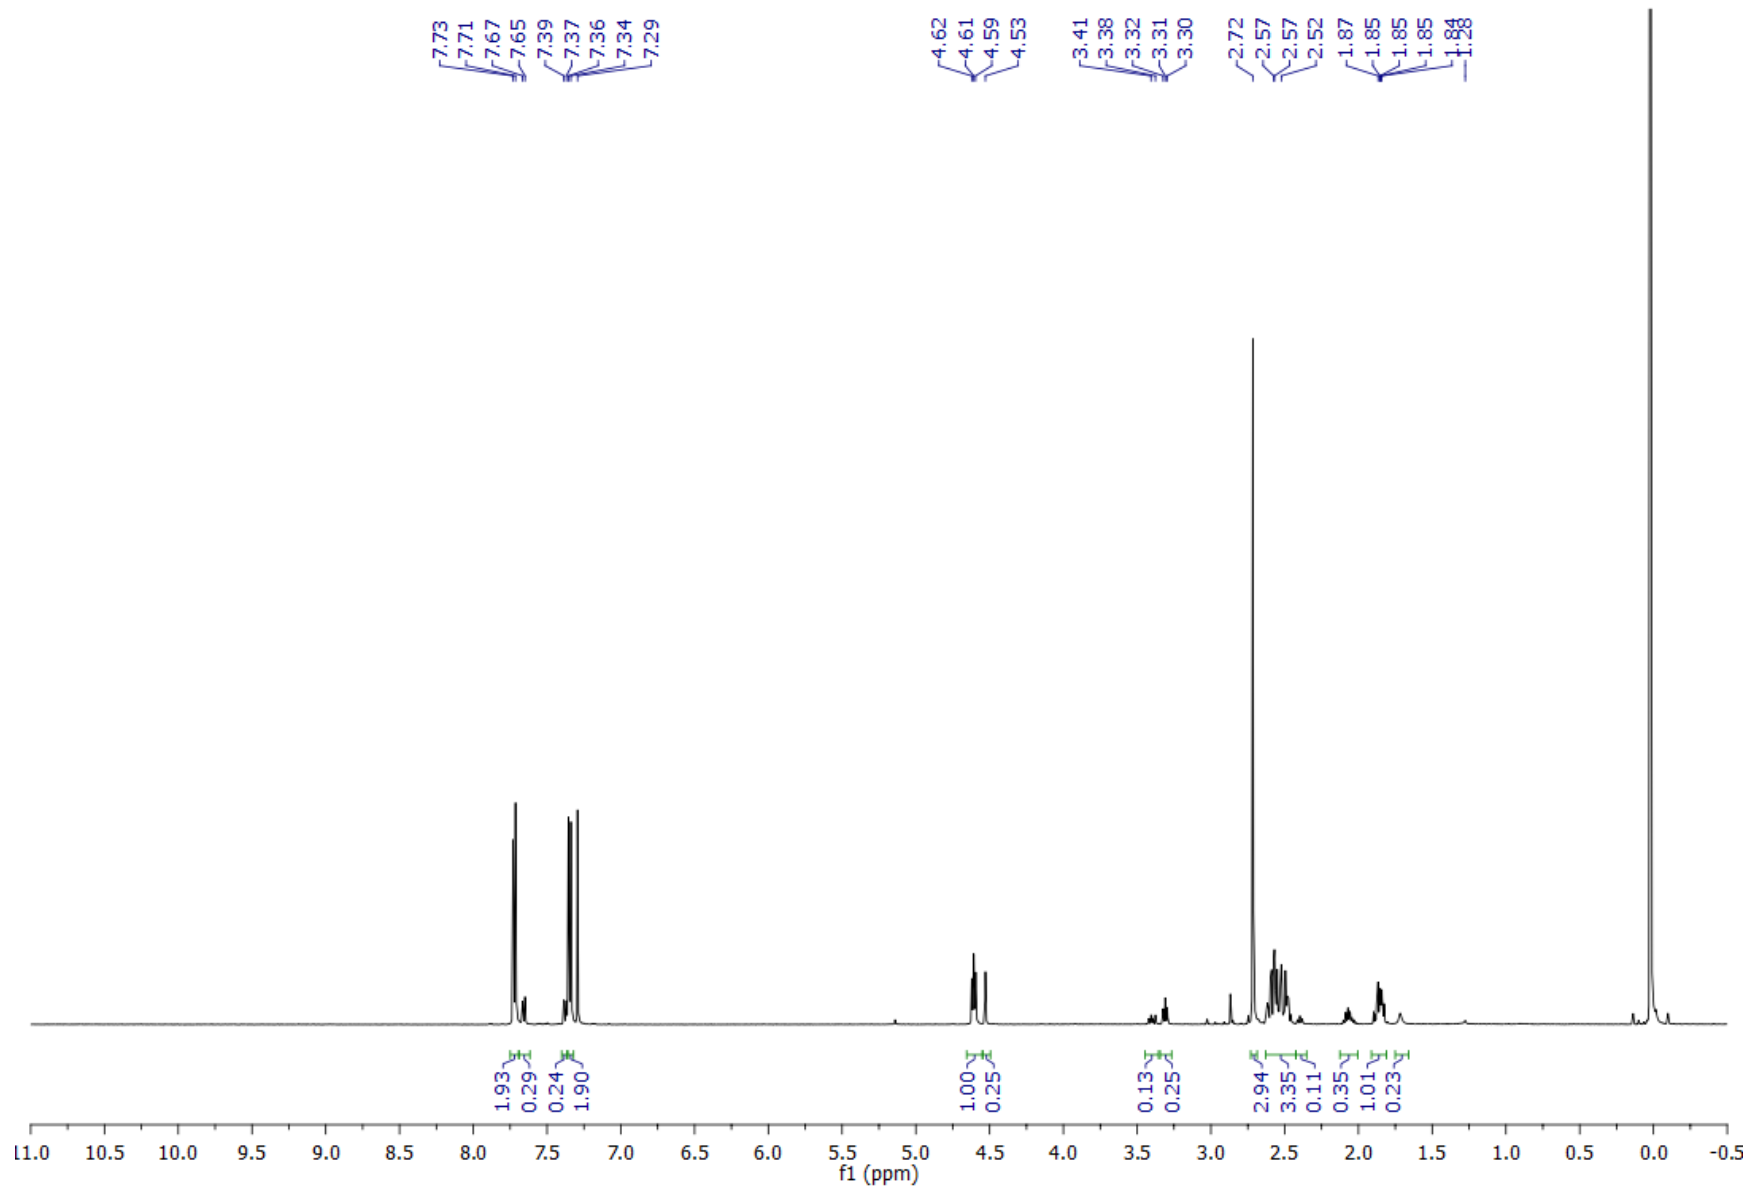

<sup>13</sup>C NMR Spectrum of 4-(1-Methyl-5-oxopyrrolidin-2-yl)benzonitrile (10)

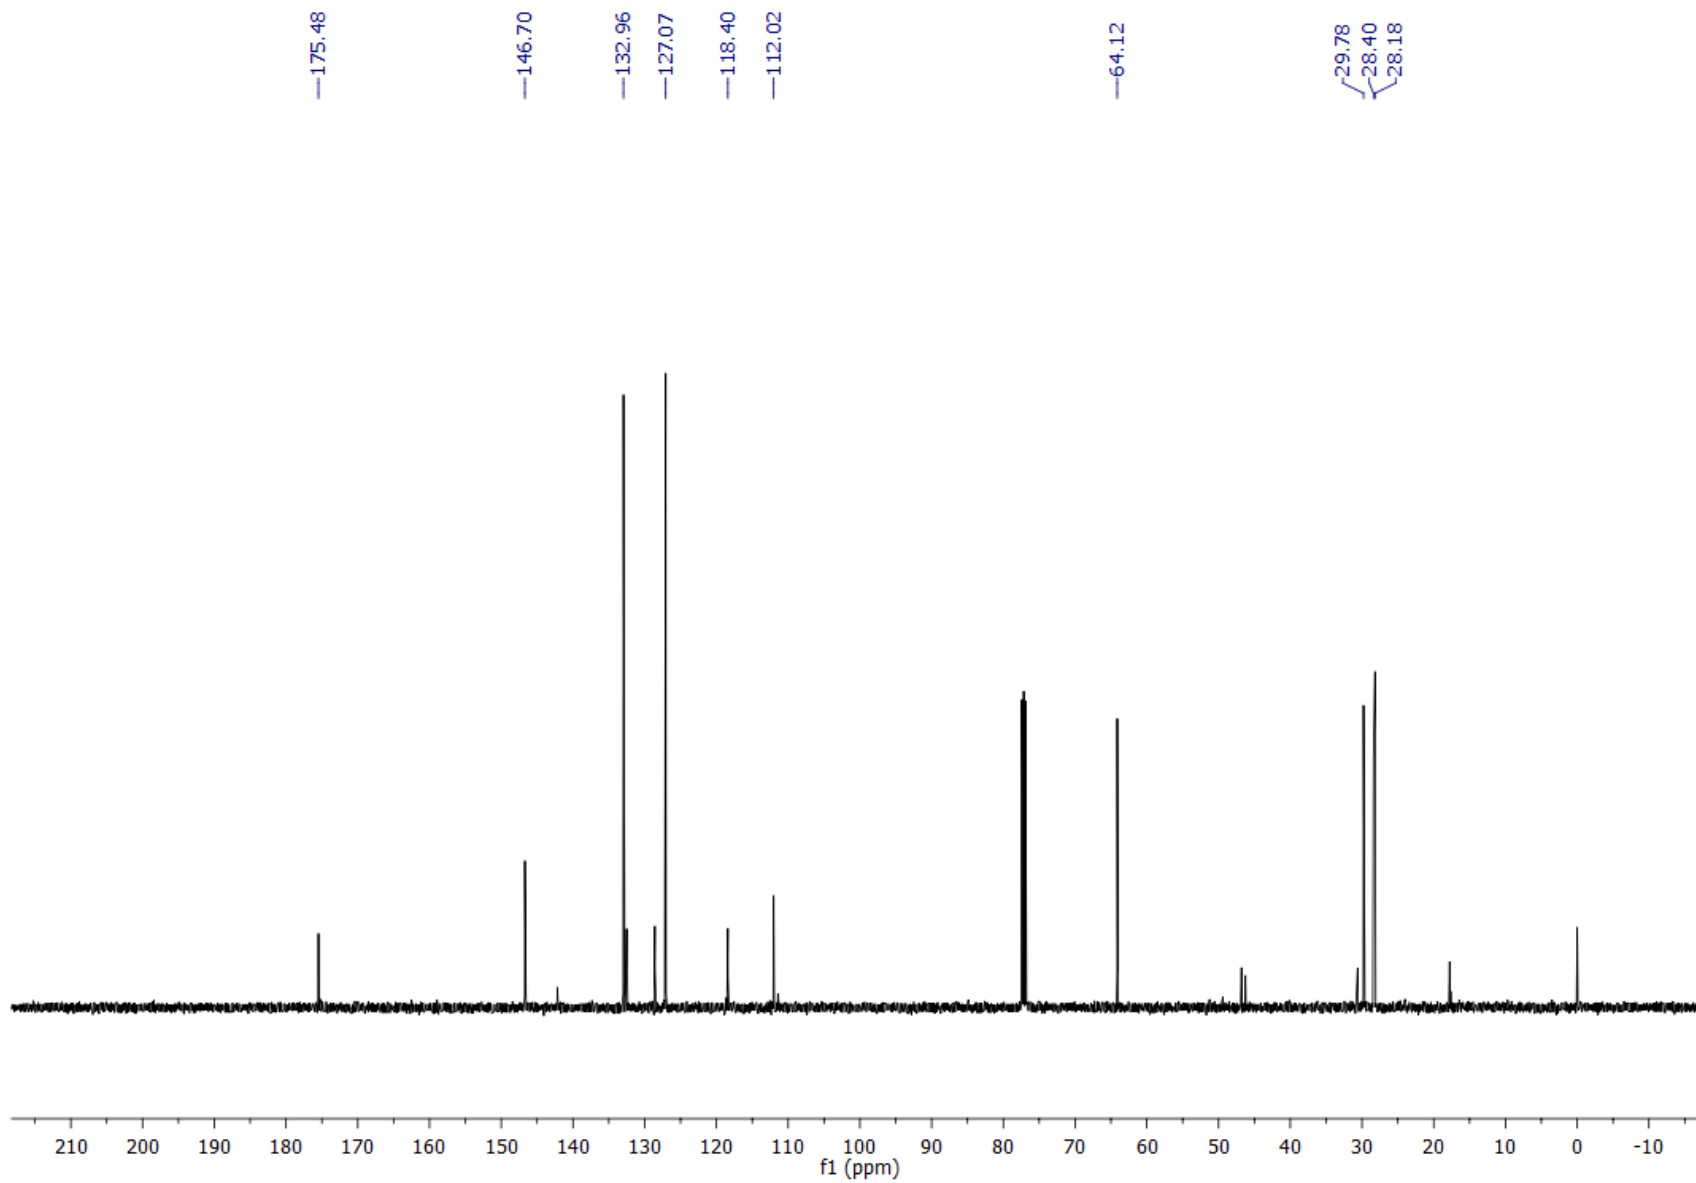

<sup>1</sup>H NMR Spectrum of 4-Benzylbenzonitrile (11)

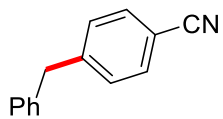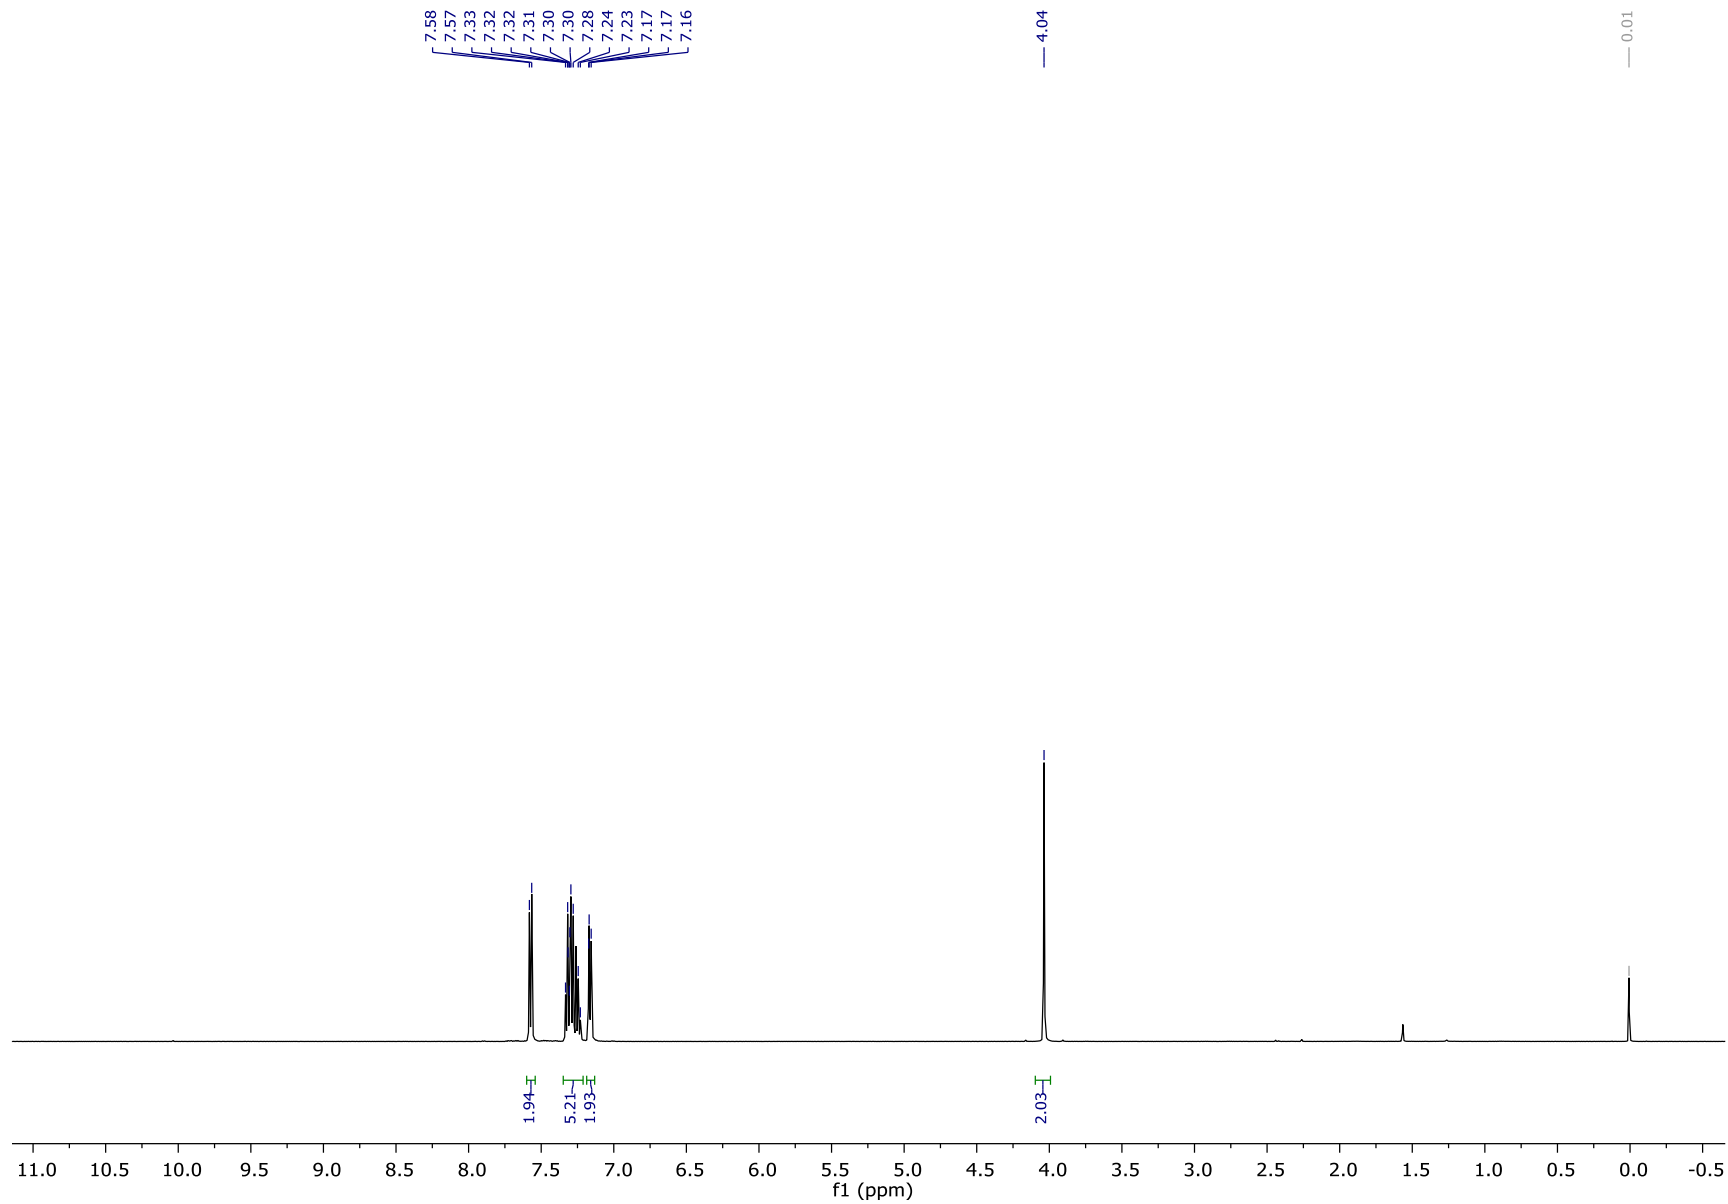

<sup>13</sup>C NMR Spectrum of 4-Benzylbenzonitrile (11)

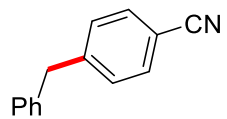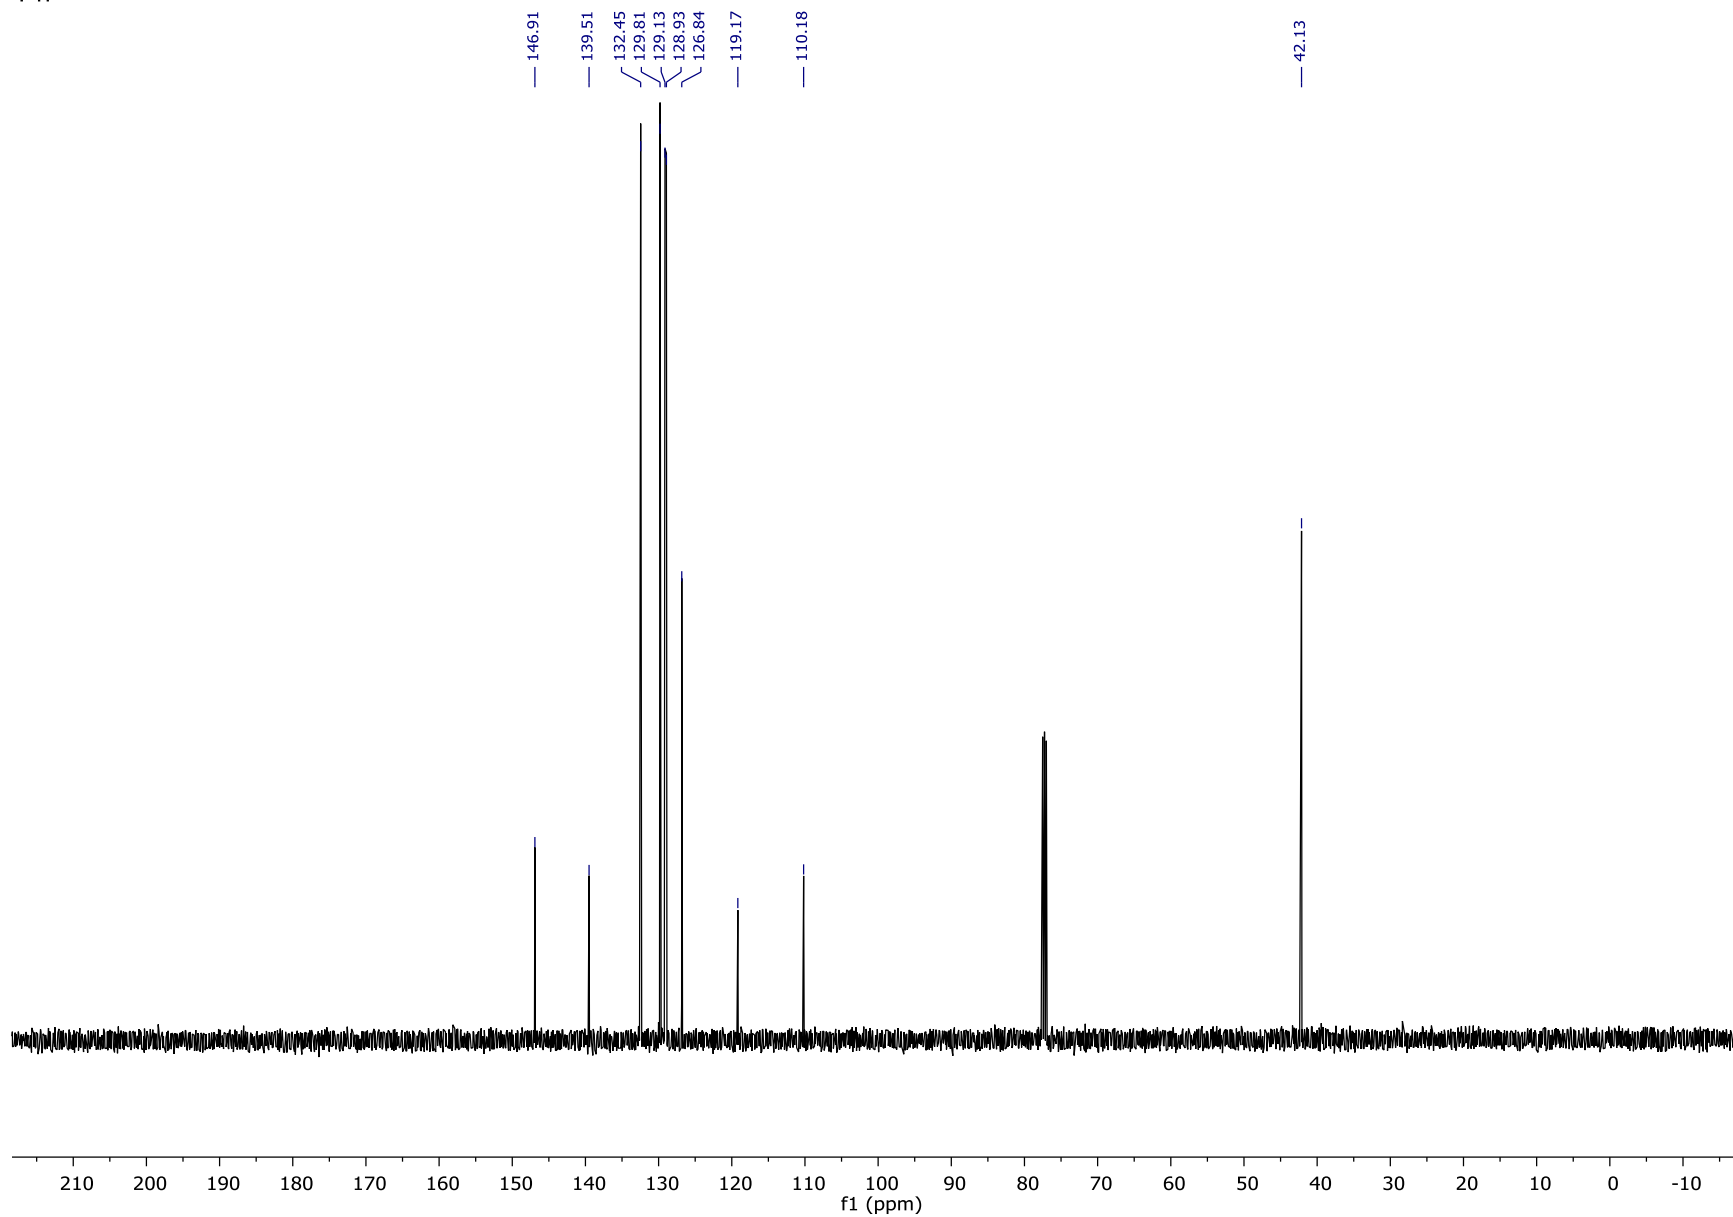



<sup>1</sup>H NMR Spectrum of Methyl 4-(Tetrahydrofuran-2-yl)benzoate (13)

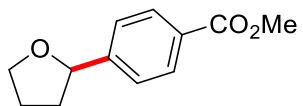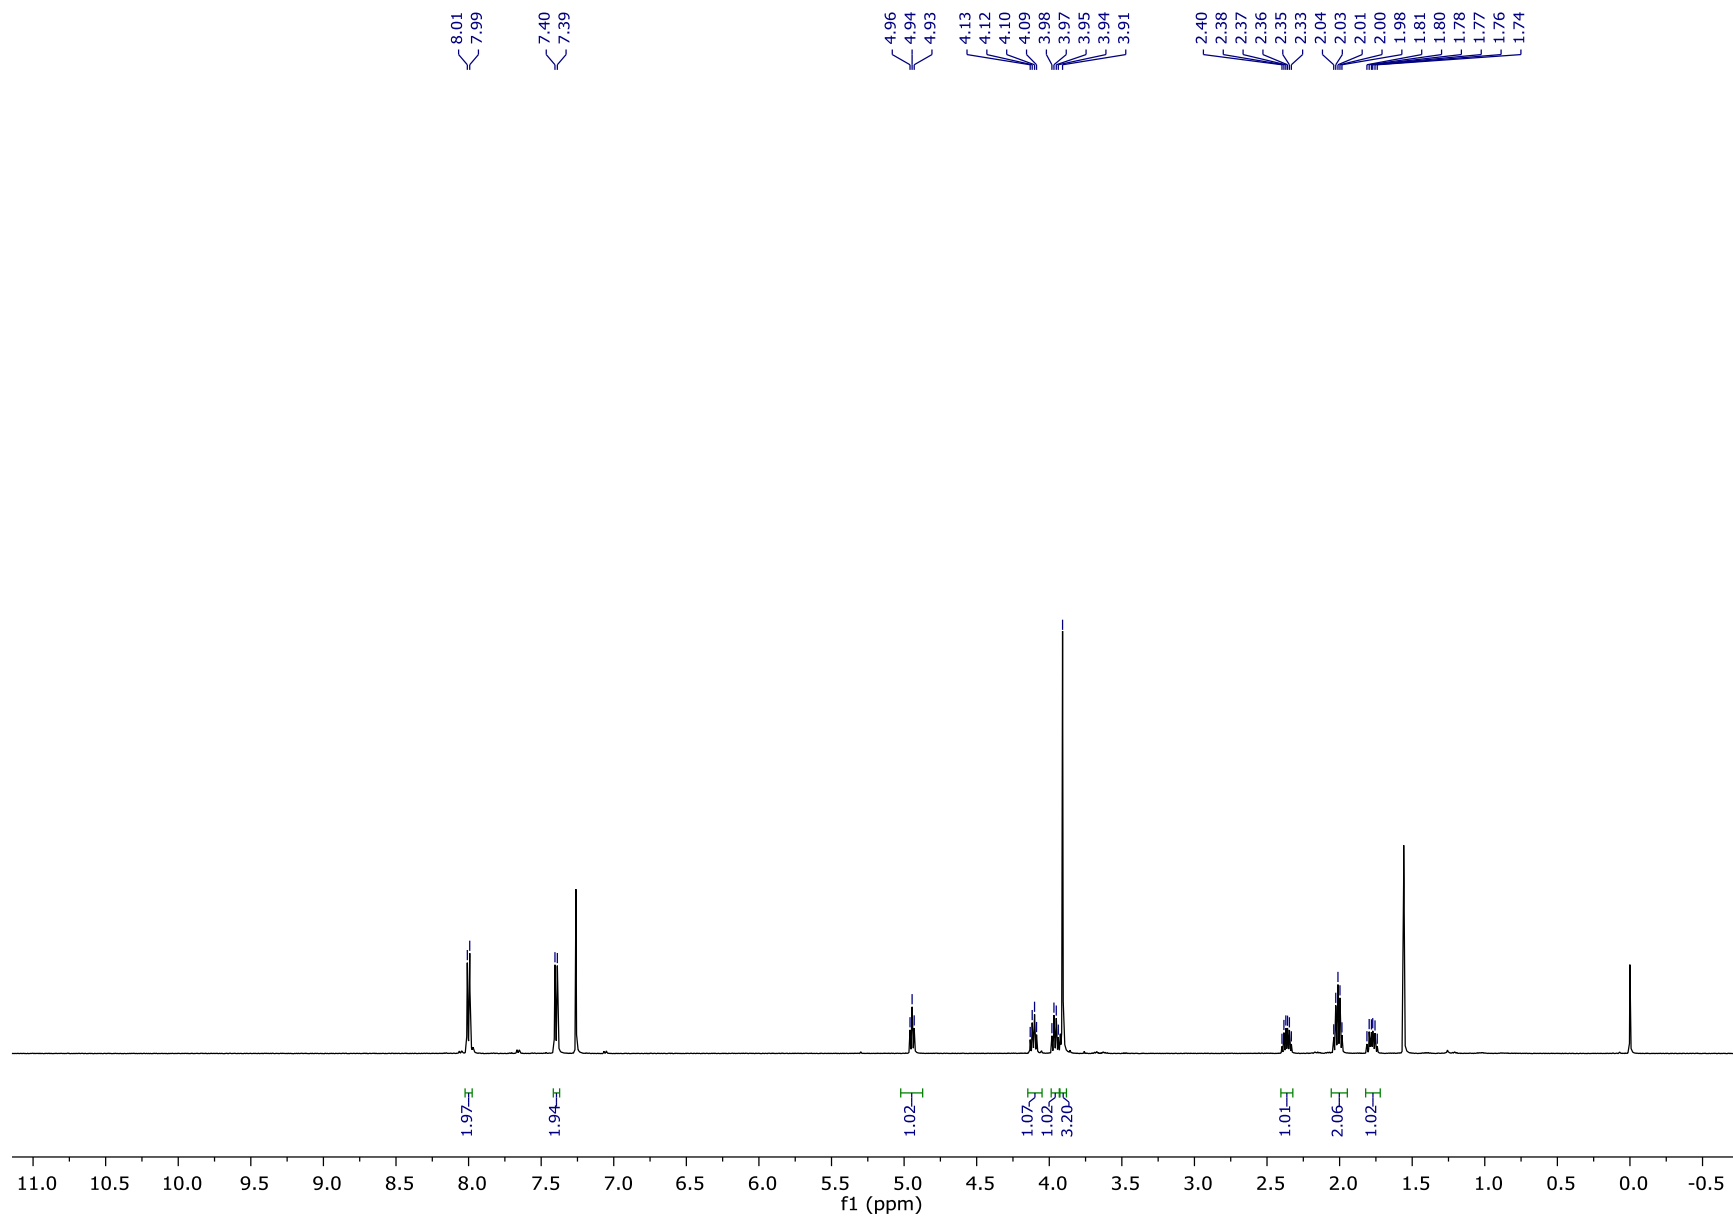

<sup>13</sup>C NMR Spectrum of Methyl 4-(Tetrahydrofuran-2-yl)benzoate (13)



167.17

149.07

129.80

126.31

125.56

80.33

69.01

52.19

34.85

26.10

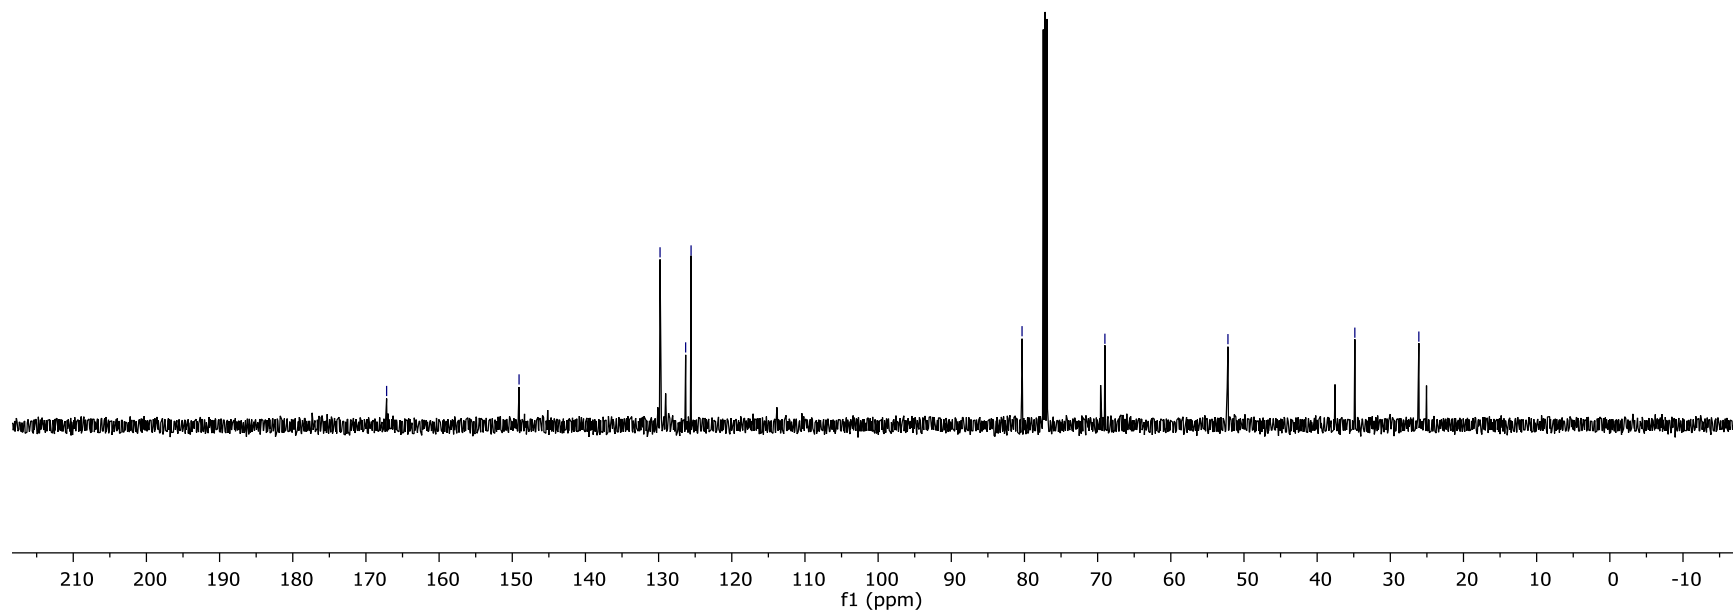

<sup>1</sup>H NMR Spectrum of 1-(4-(Tetrahydrofuran-2-yl)phenyl)ethan-1-one (14)

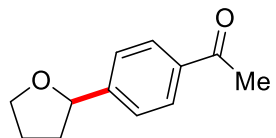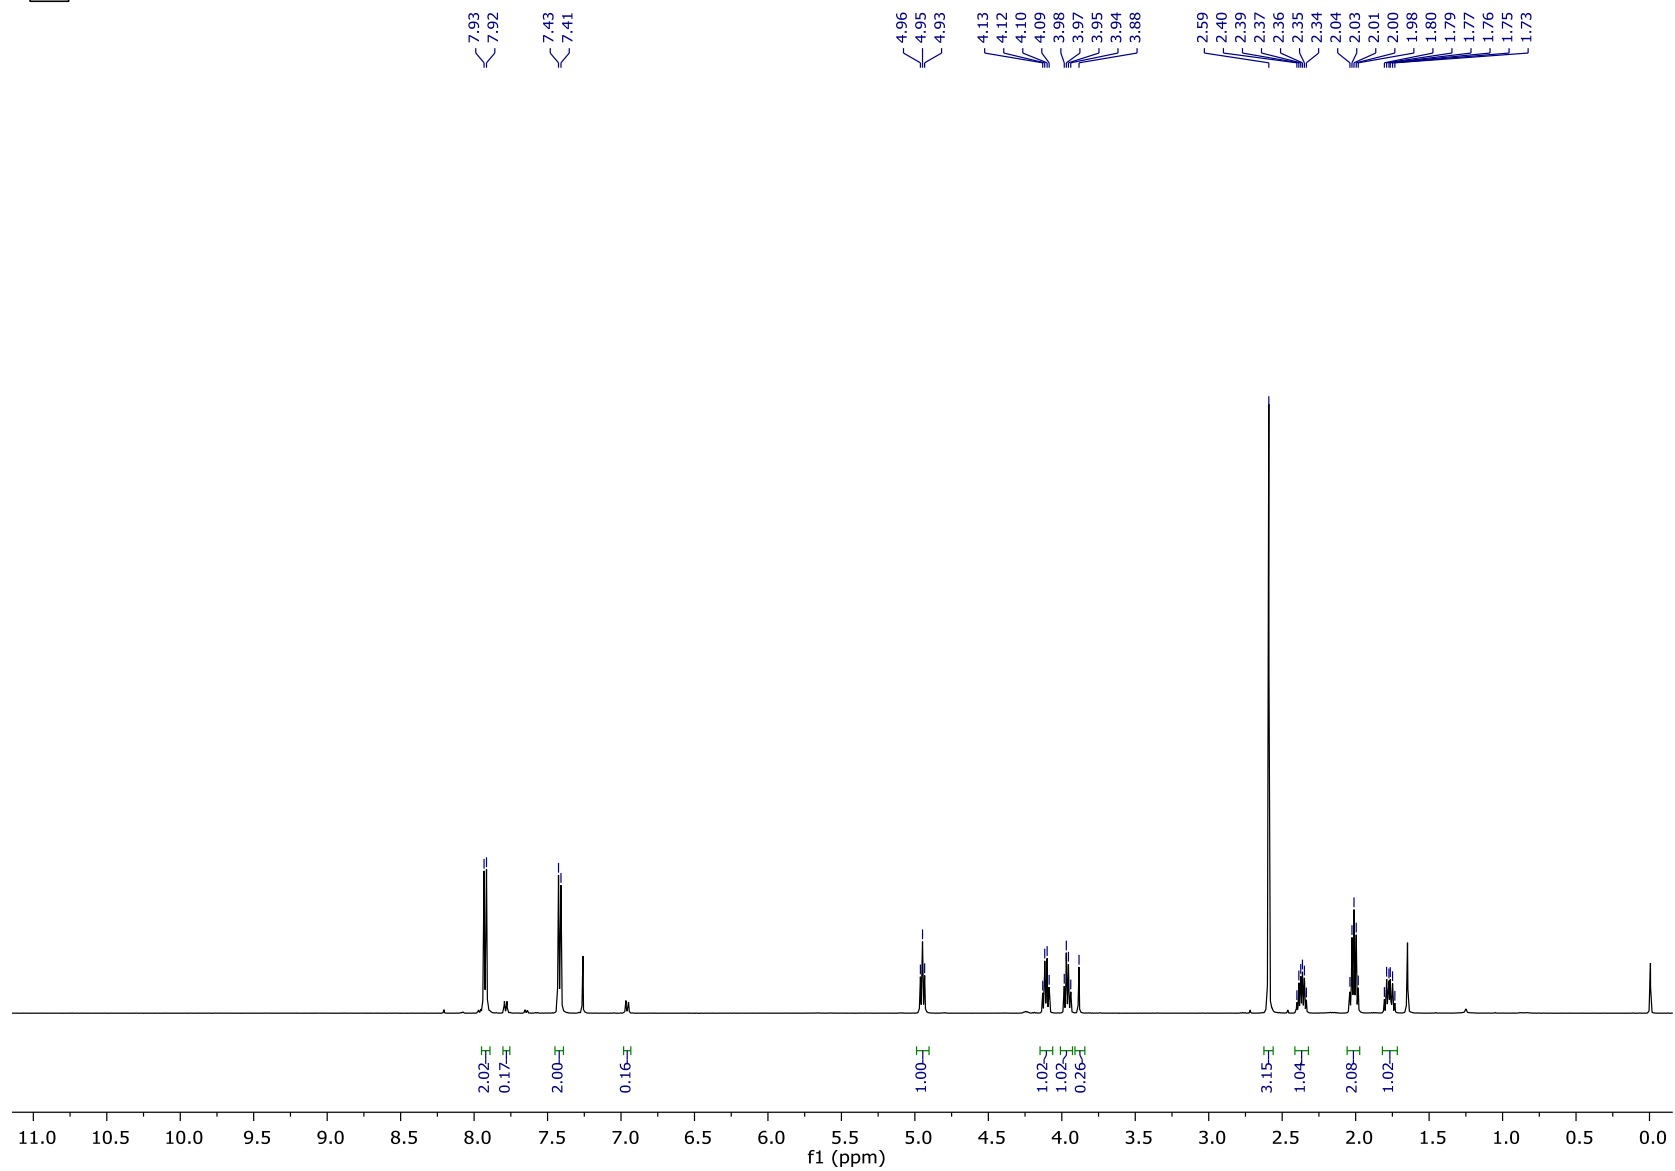

<sup>13</sup>C NMR Spectrum of 1-(4-(Tetrahydrofuran-2-yl)phenyl)ethan-1-one (14)

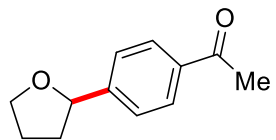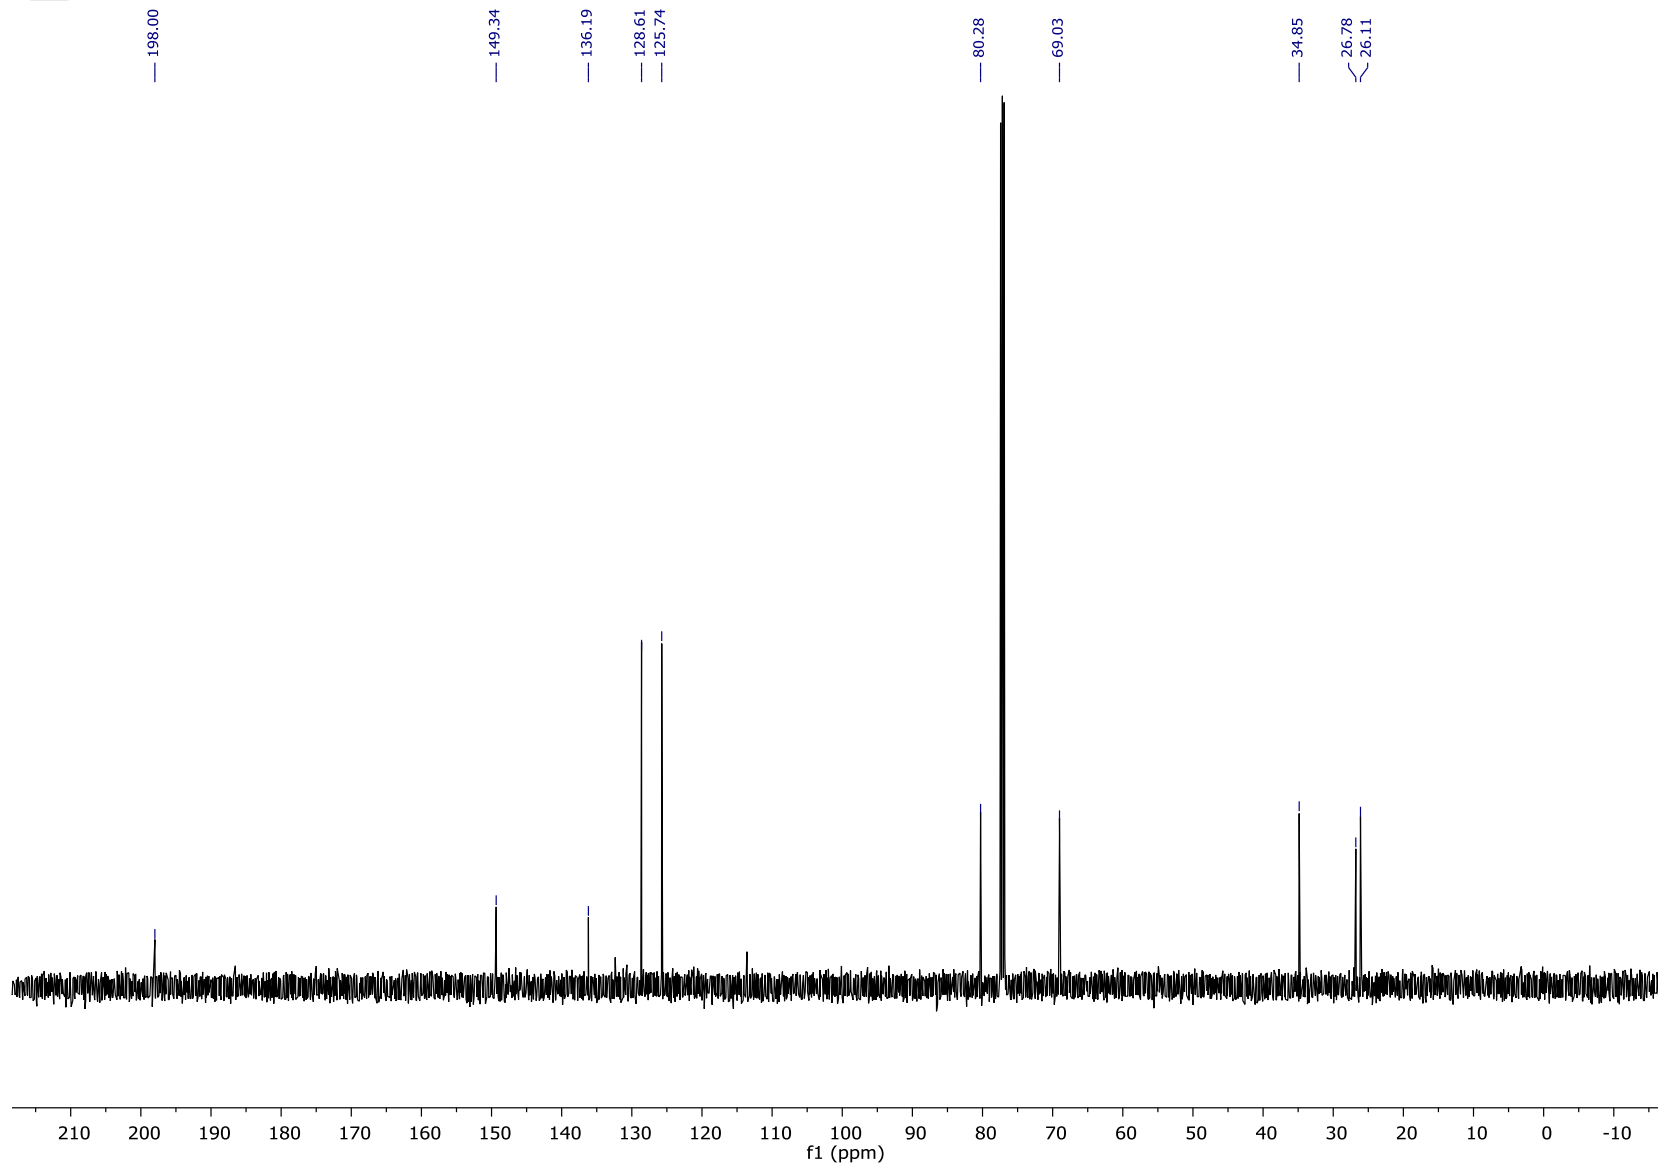

# <sup>1</sup>H NMR Spectrum of 4-(Tetrahydrofuran-2-yl)benzaldehyde (15)

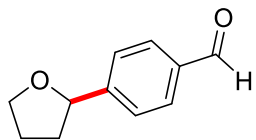

10.00

7.84  
7.83

7.49  
7.48

4.97  
4.96  
4.95

4.94  
4.93

4.13  
4.11  
4.10

4.09  
4.08

3.98  
3.97

3.95  
3.93

2.40  
2.39

2.37  
2.36

2.35

2.04  
2.02

2.01  
2.00

2.00  
1.99

1.97  
1.78

1.77  
1.76

1.75  
1.74

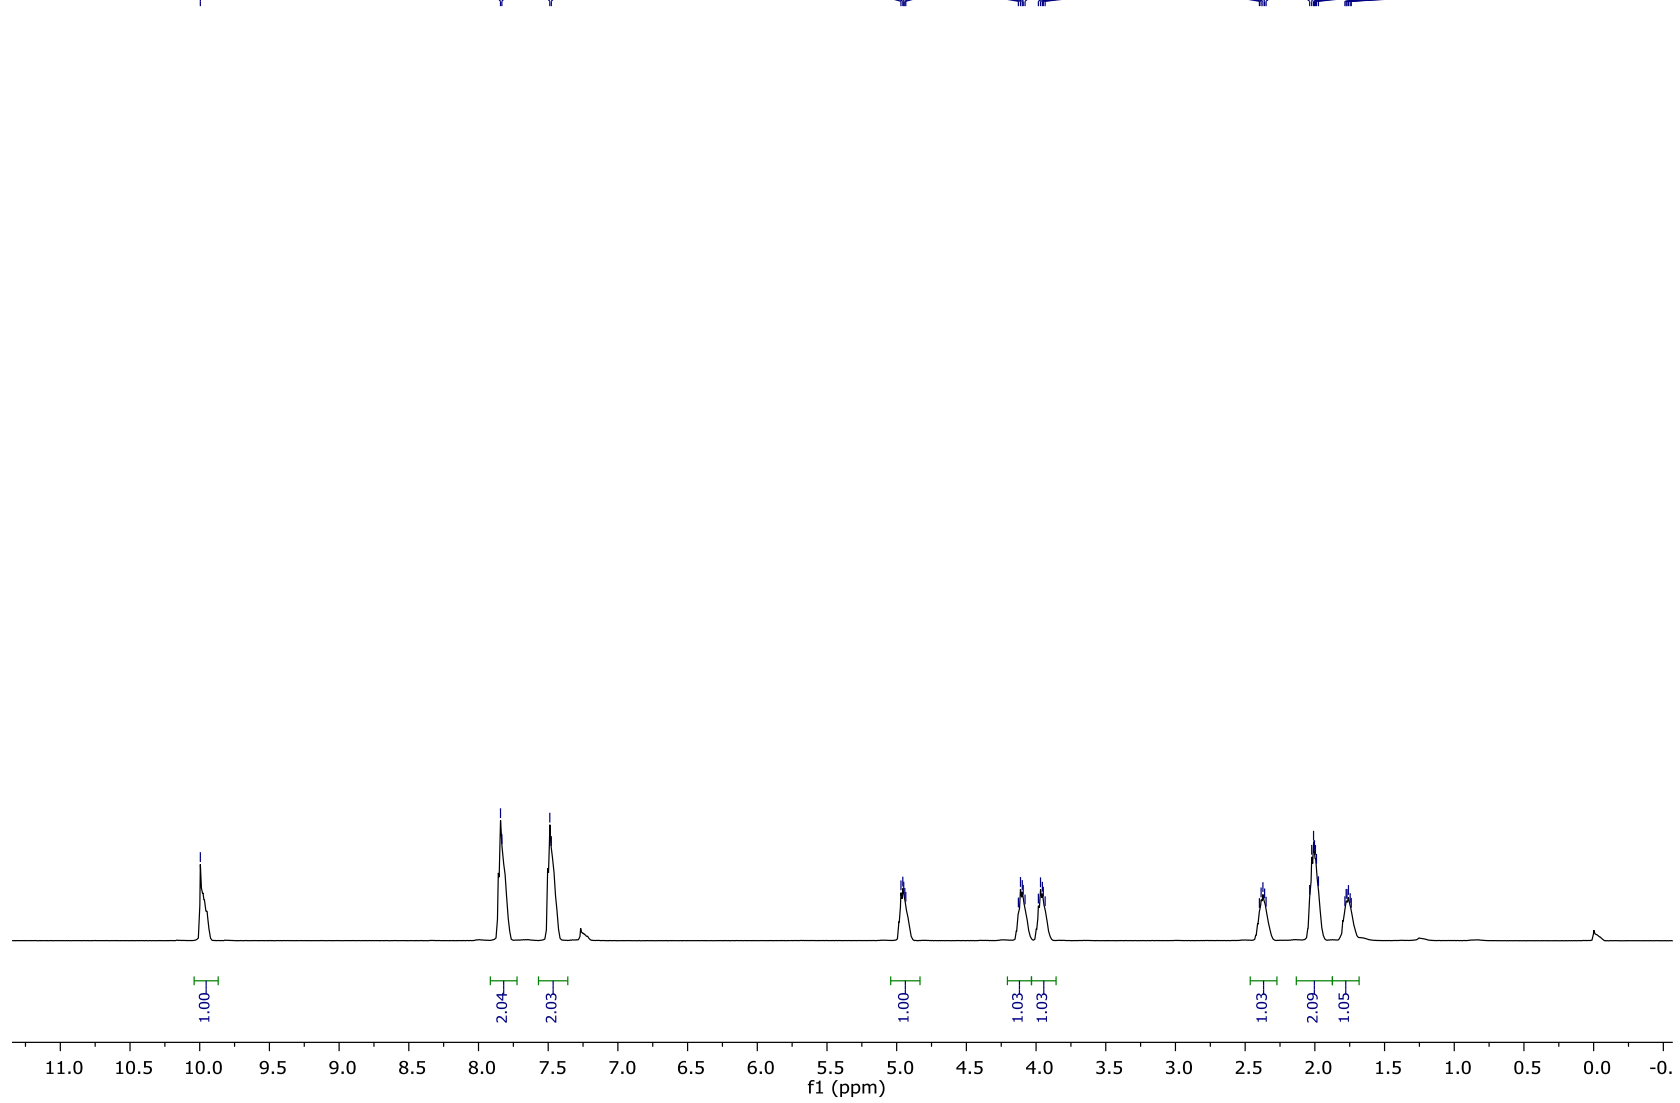

<sup>13</sup>C NMR Spectrum of 4-(Tetrahydrofuran-2-yl)benzaldehyde (15)

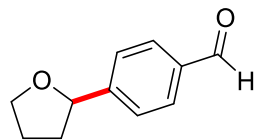

— 192.14

— 150.99

— 135.58

— 130.04

— 126.17

— 80.27

— 69.10

— 34.90

— 26.13

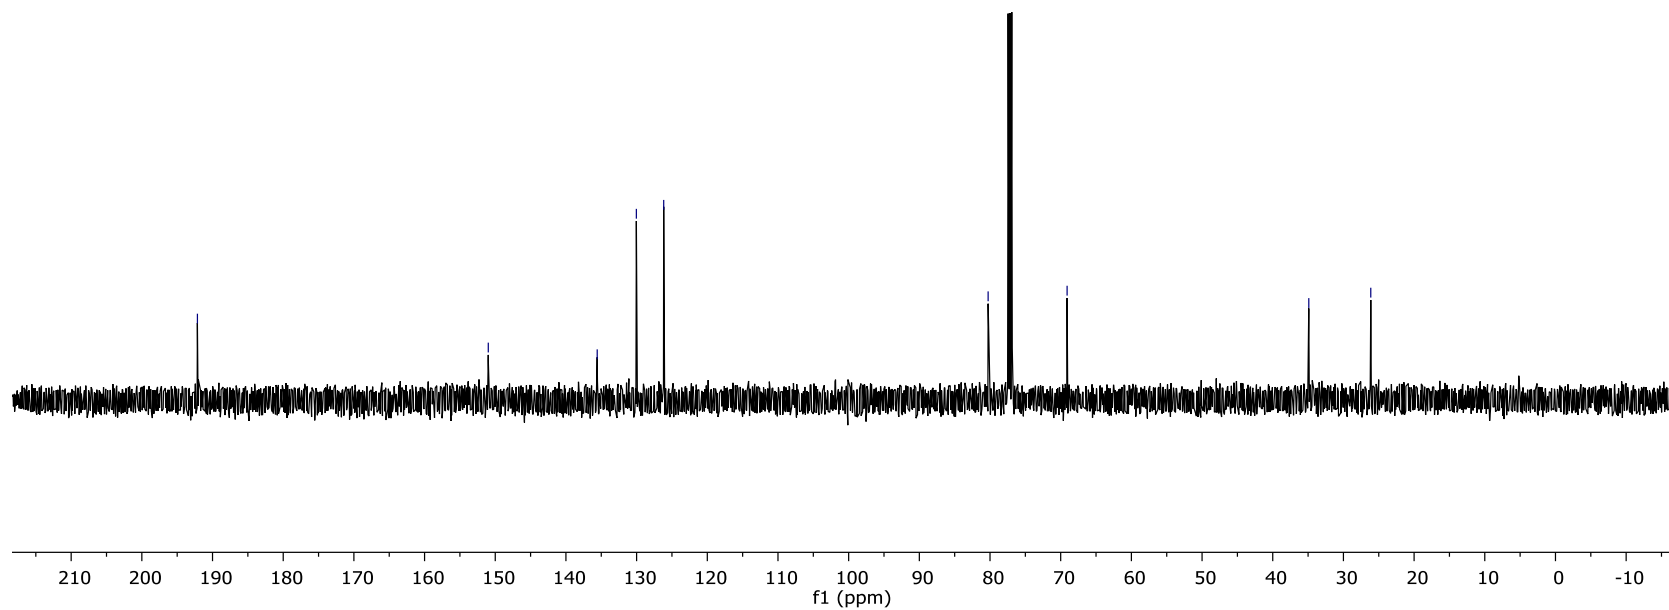

<sup>1</sup>H NMR Spectrum of 2-(4-(trifluoromethyl)phenyl)tetrahydrofuran (16)

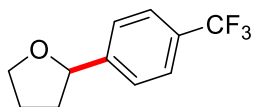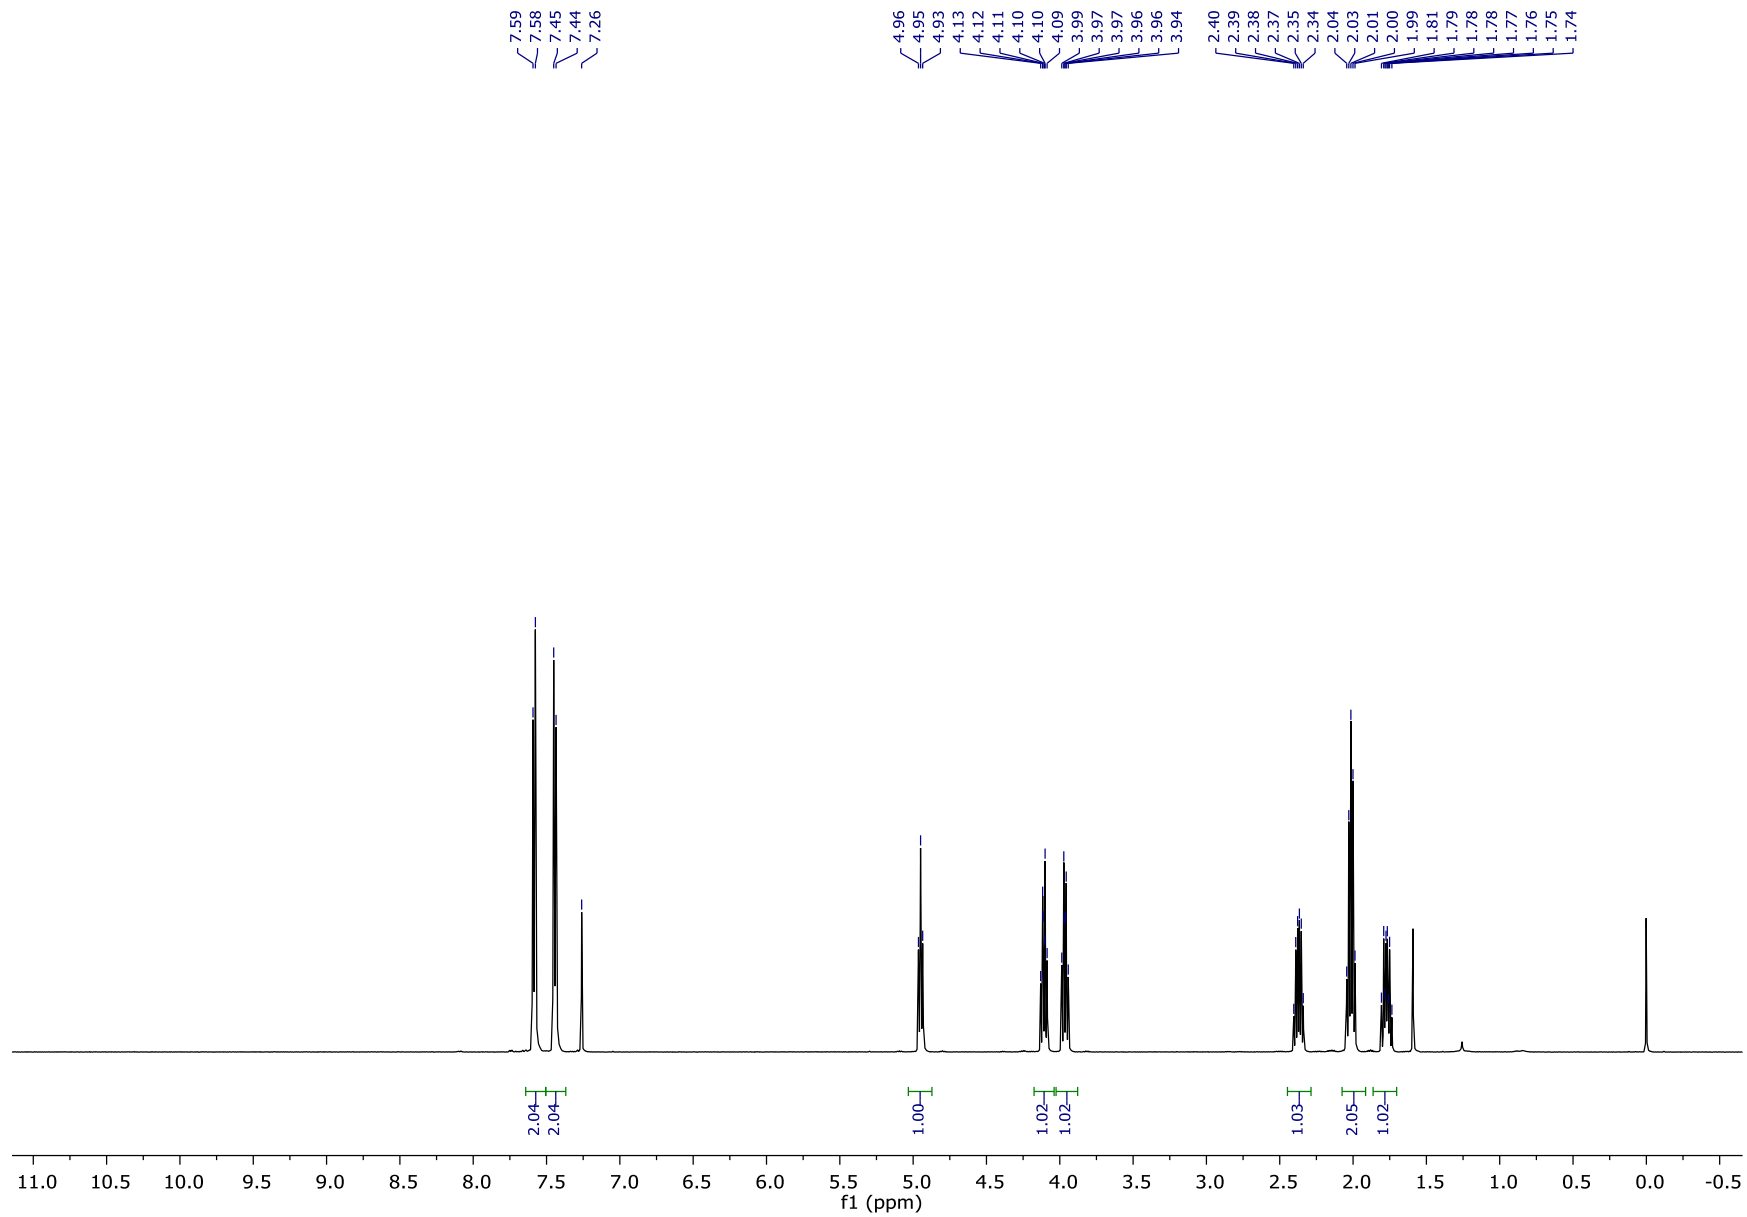

<sup>13</sup>C NMR Spectrum of 2-(4-(trifluoromethyl)phenyl)tetrahydrofuran (16)

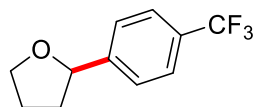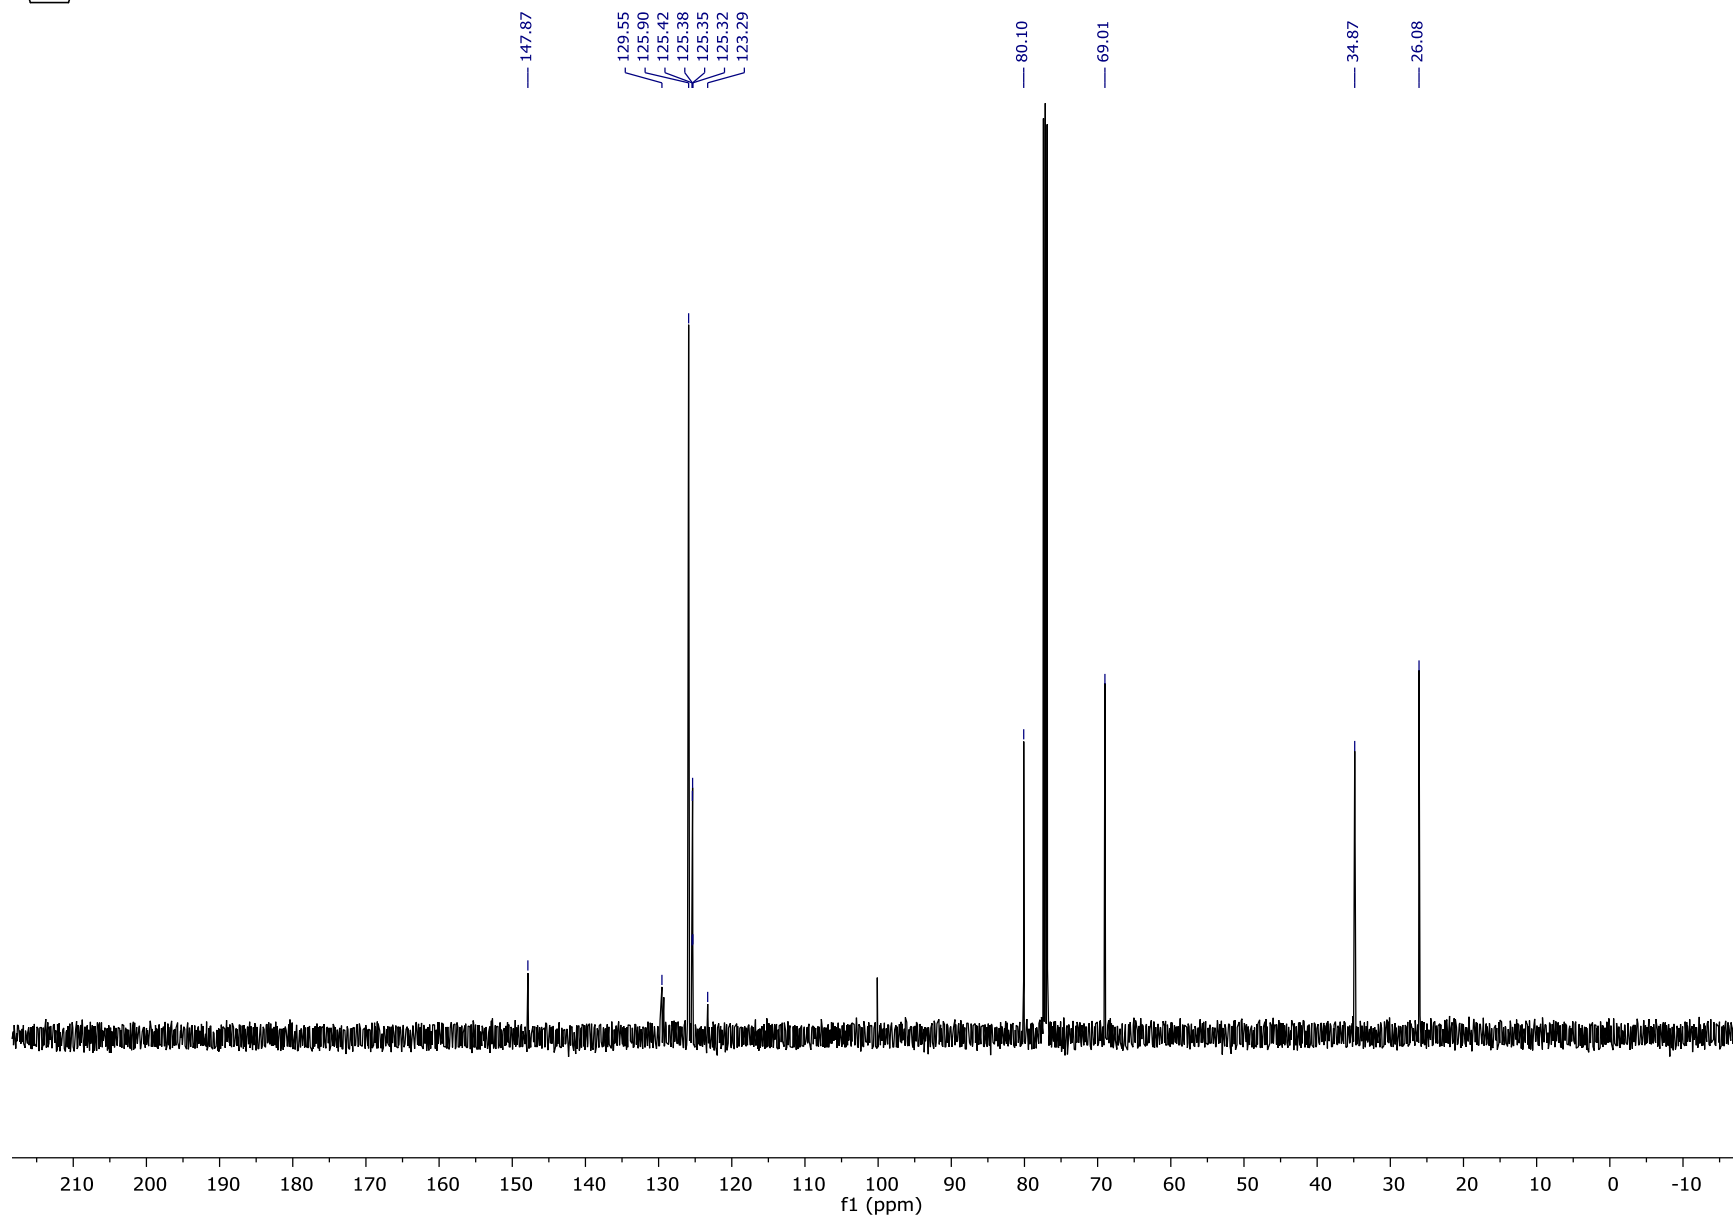



<sup>19</sup>F NMR Spectrum of 2-(4-(trifluoromethyl)phenyl)tetrahydrofuran (16)

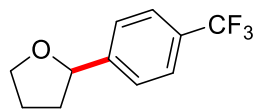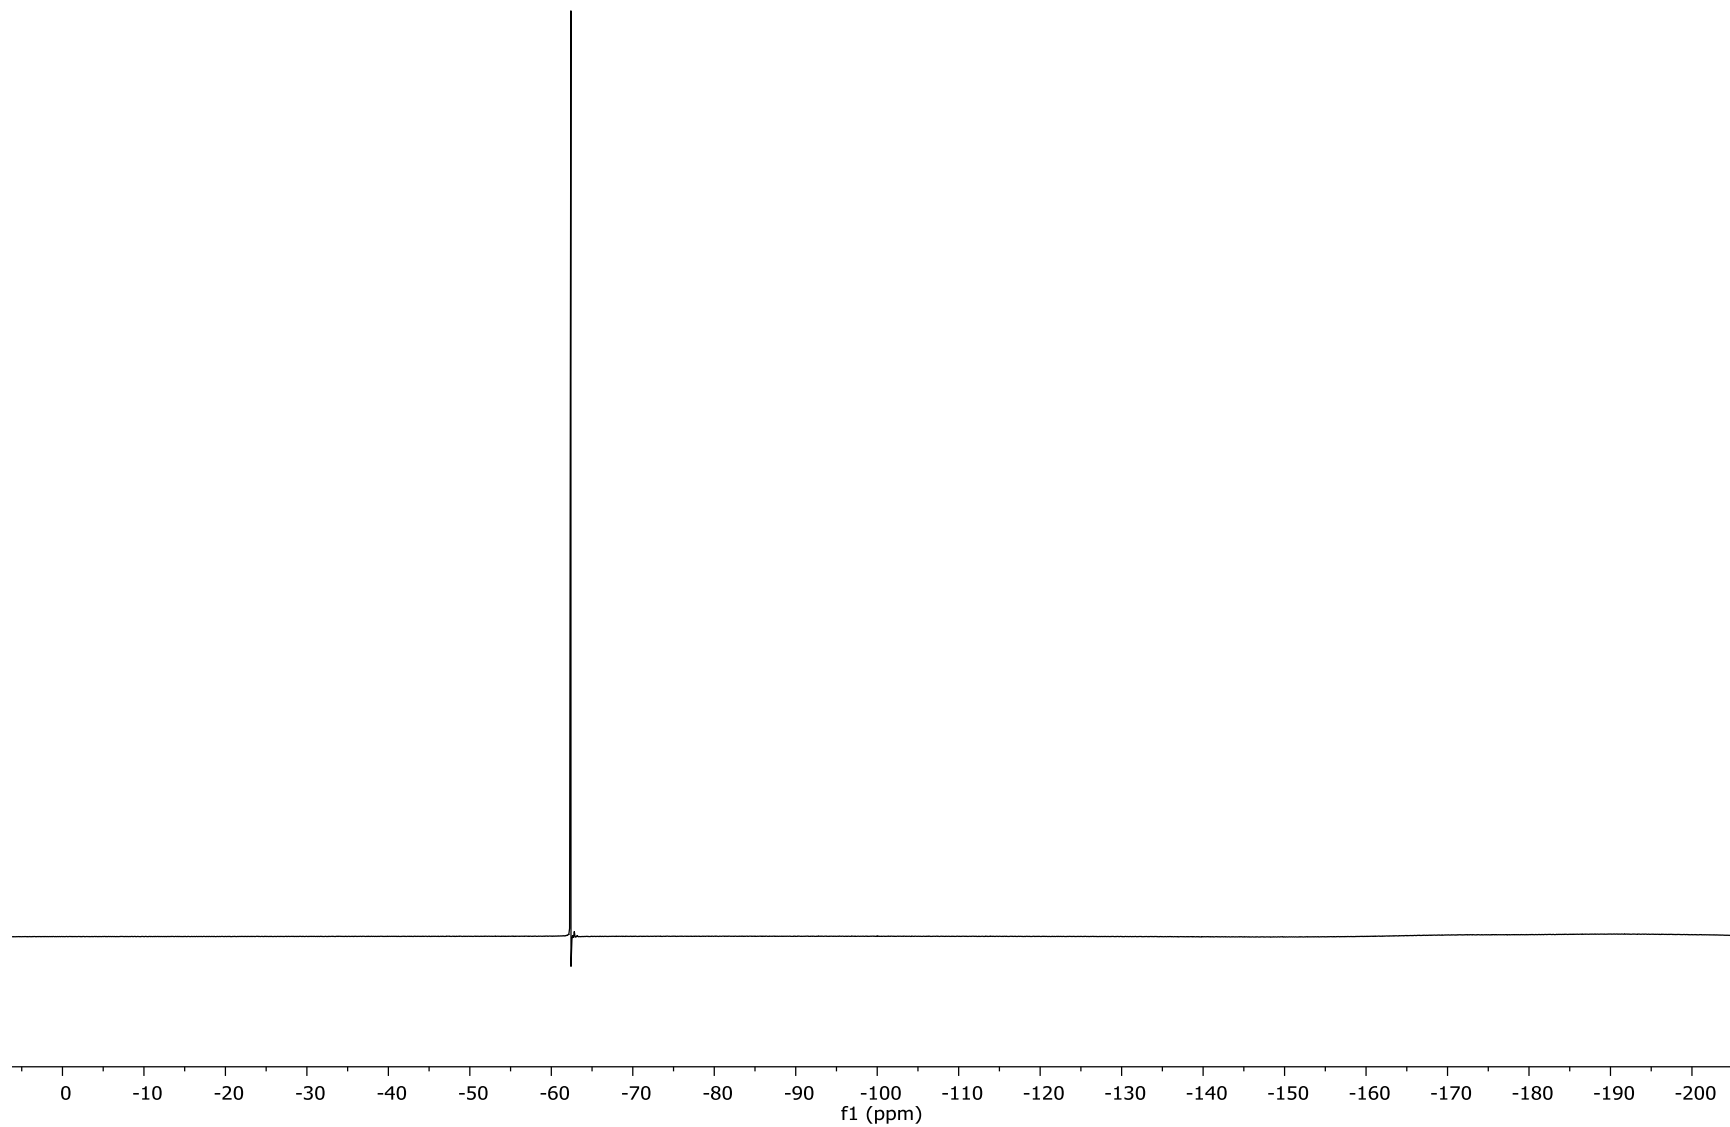

<sup>1</sup>H NMR Spectrum of 2-(4-Chlorophenyl)tetrahydrofuran (17)

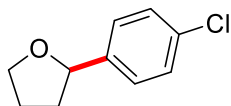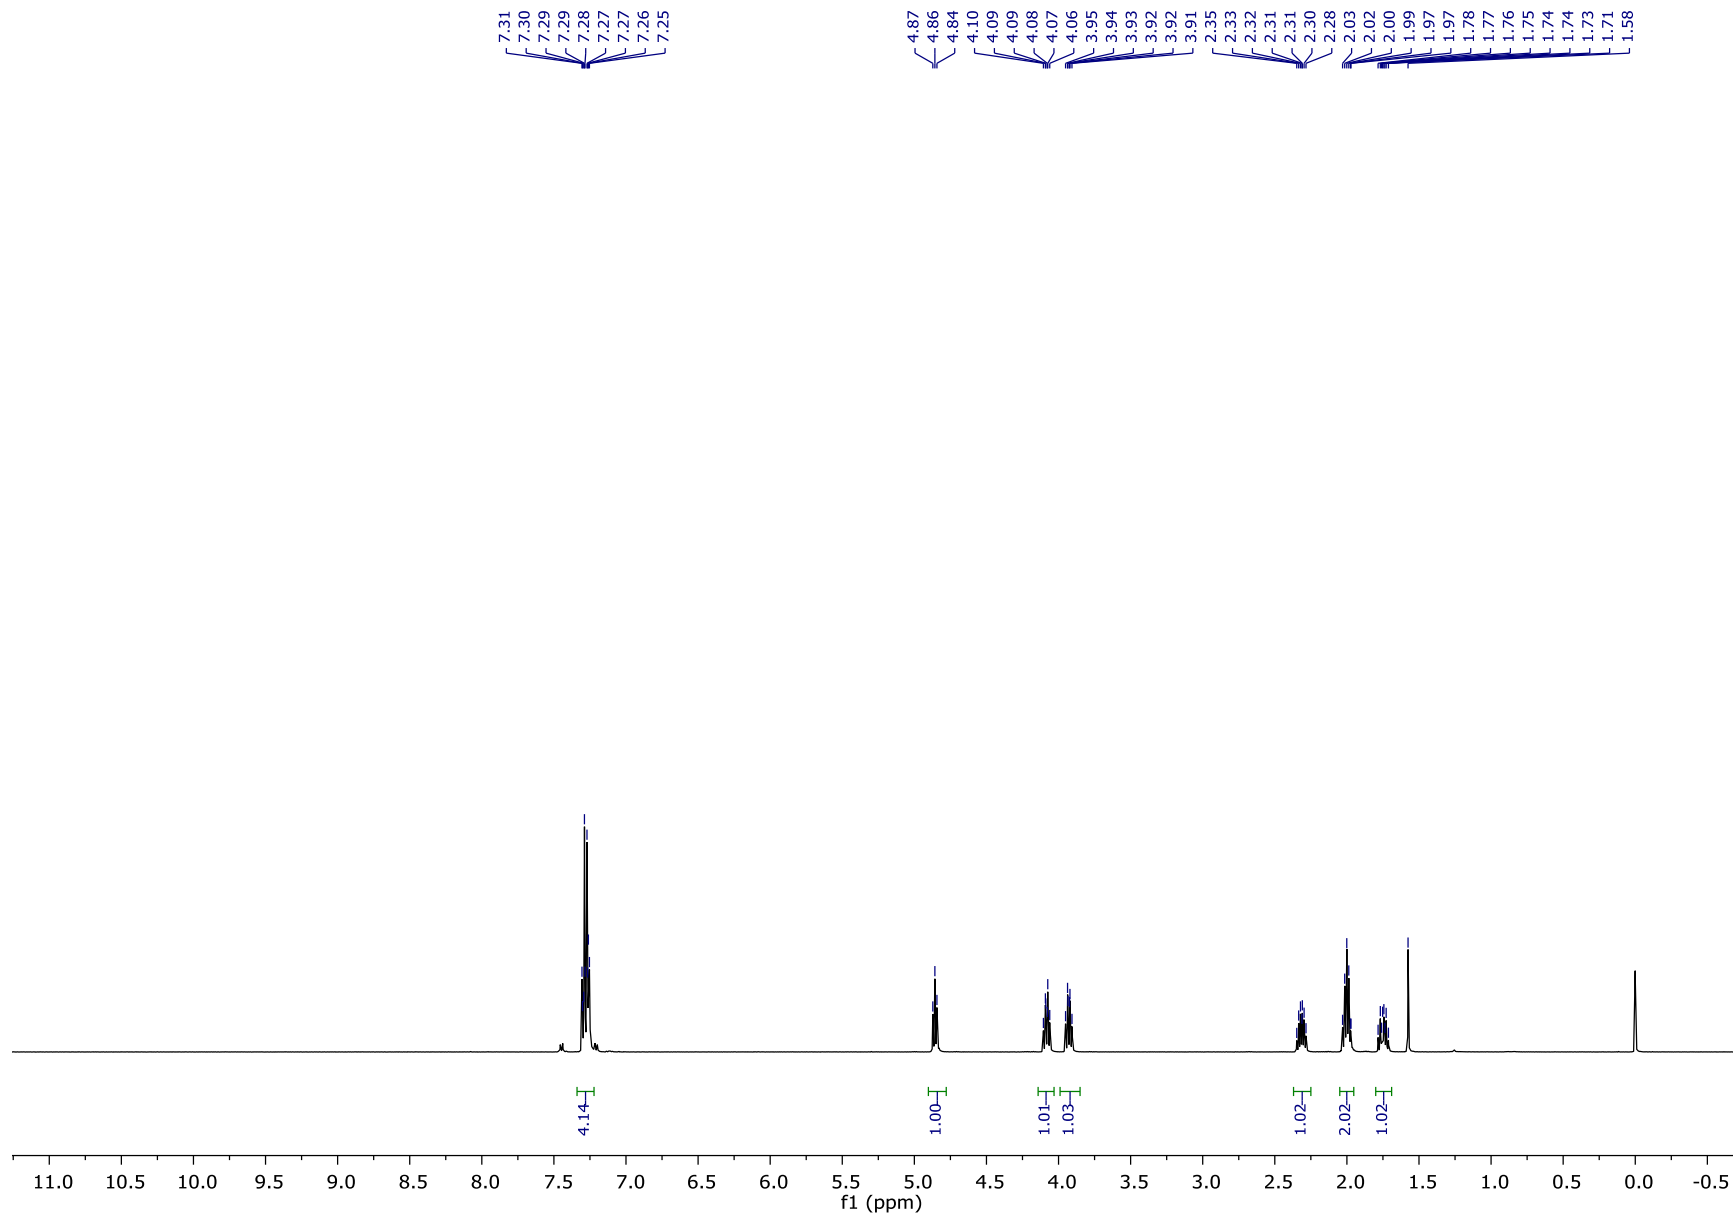

<sup>13</sup>C NMR Spectrum of 2-(4-Chlorophenyl)tetrahydrofuran (17)

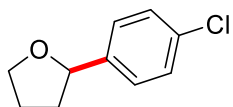

— 142.16  
— 132.85  
— 128.53  
— 127.12  
  
— 80.14  
— 68.86  
  
— 34.83  
— 26.11

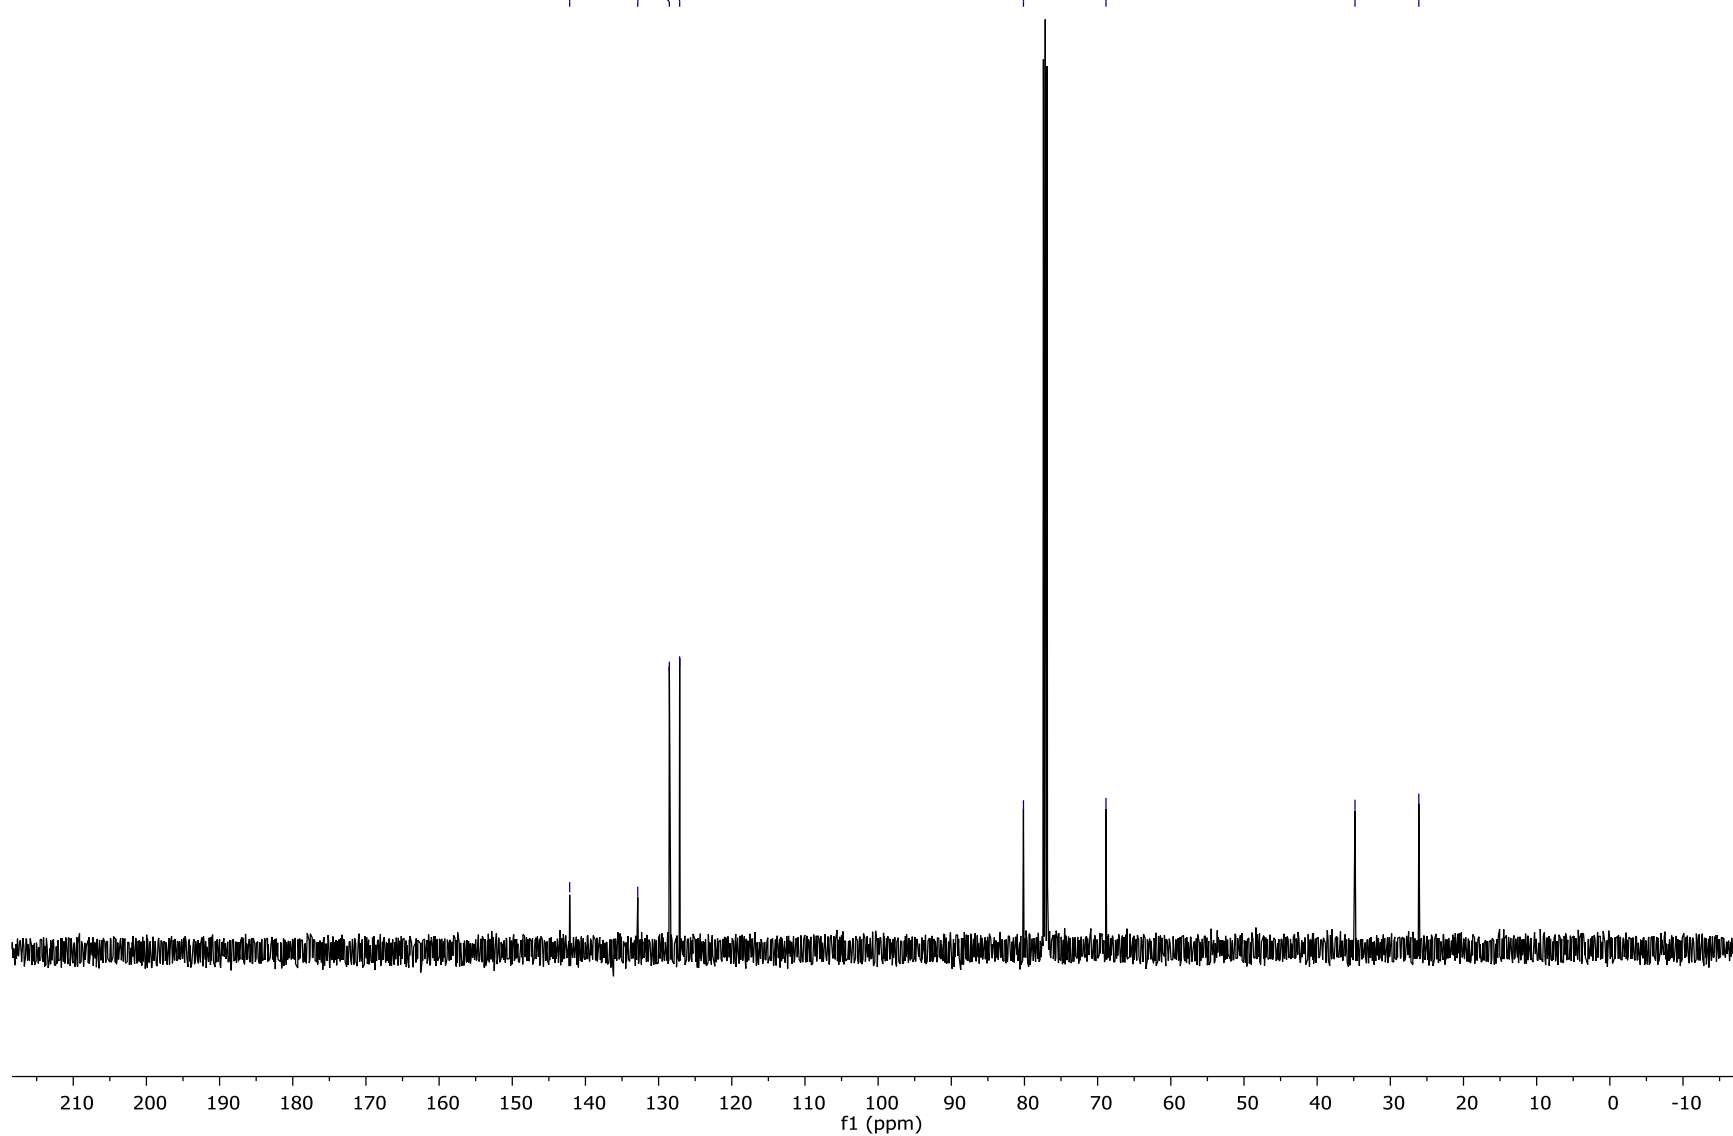

<sup>1</sup>H NMR Spectrum of 2-(4-Methoxyphenyl)tetrahydrofuran (18)

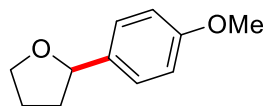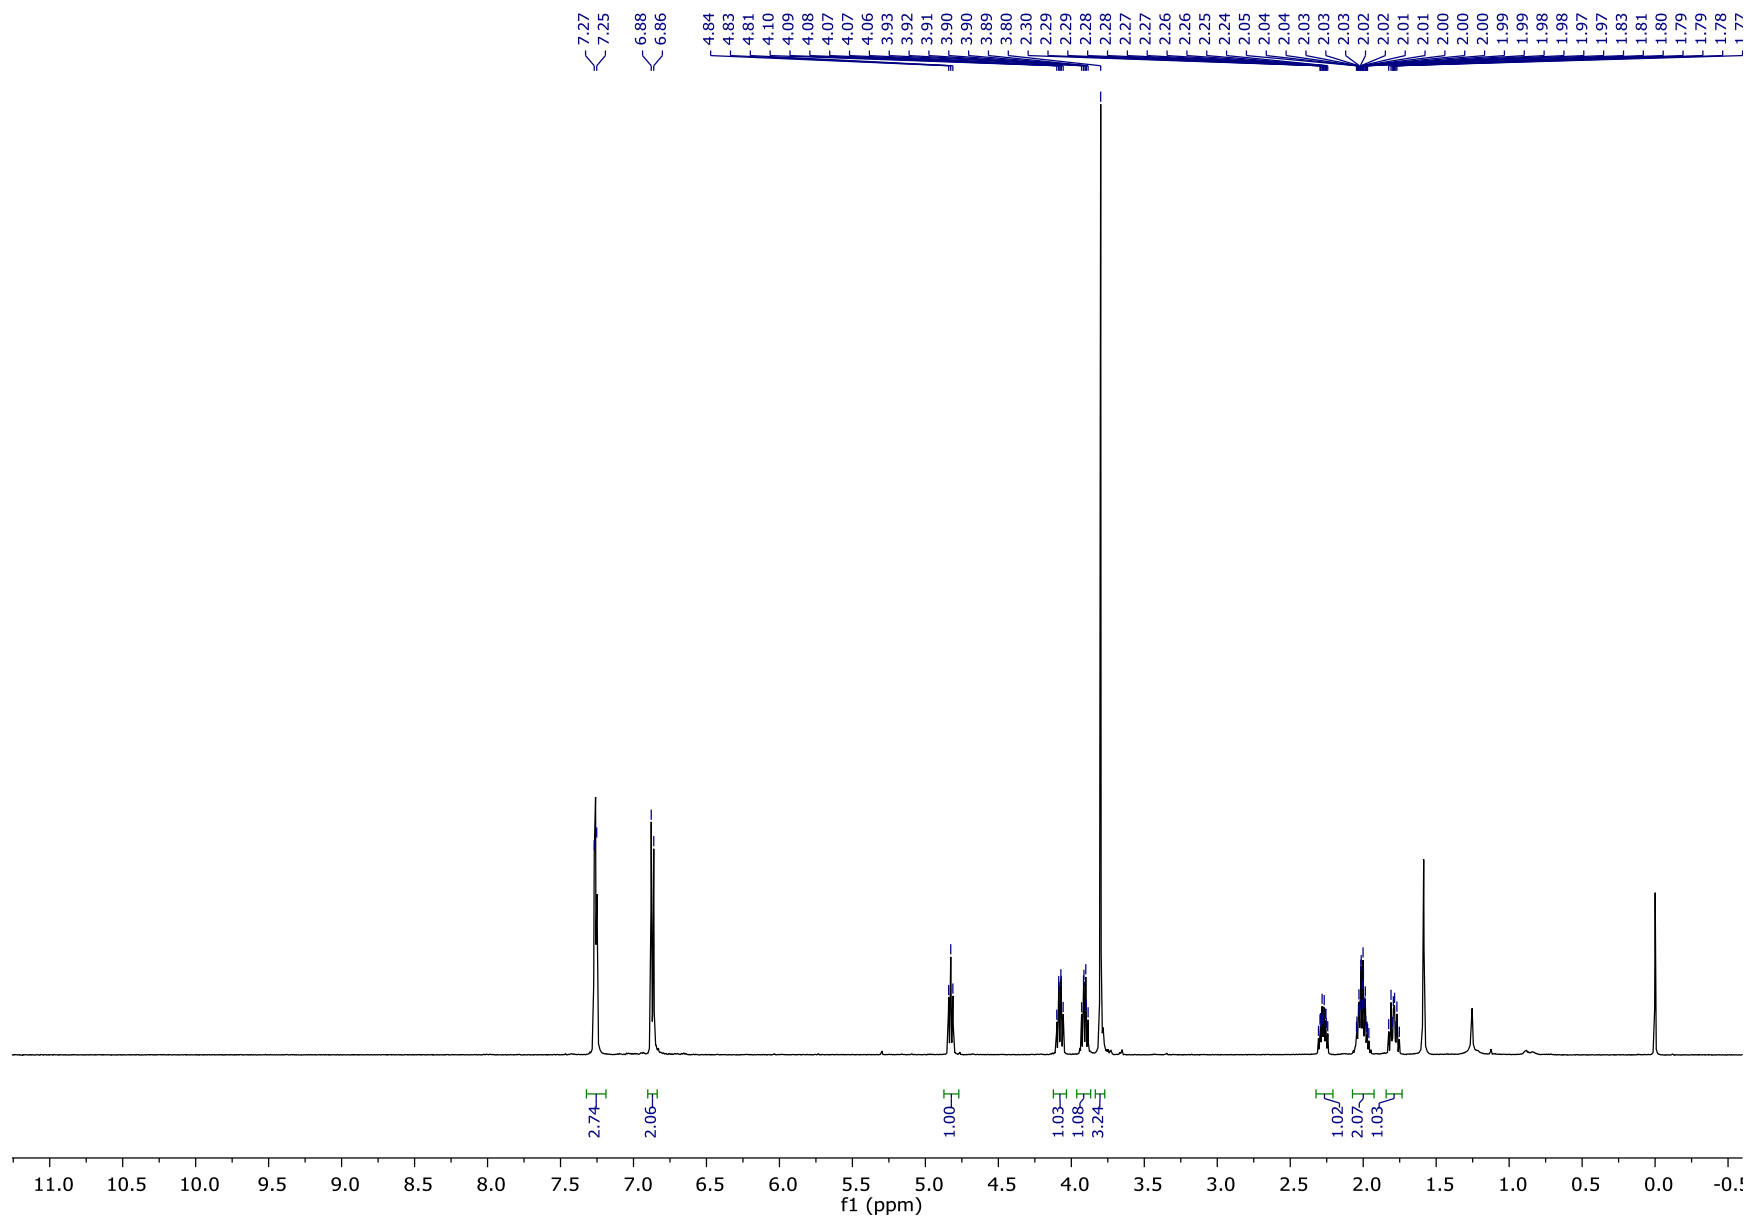

<sup>13</sup>C NMR Spectrum of 2-(4-Methoxyphenyl)tetrahydrofuran (18)

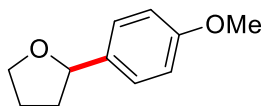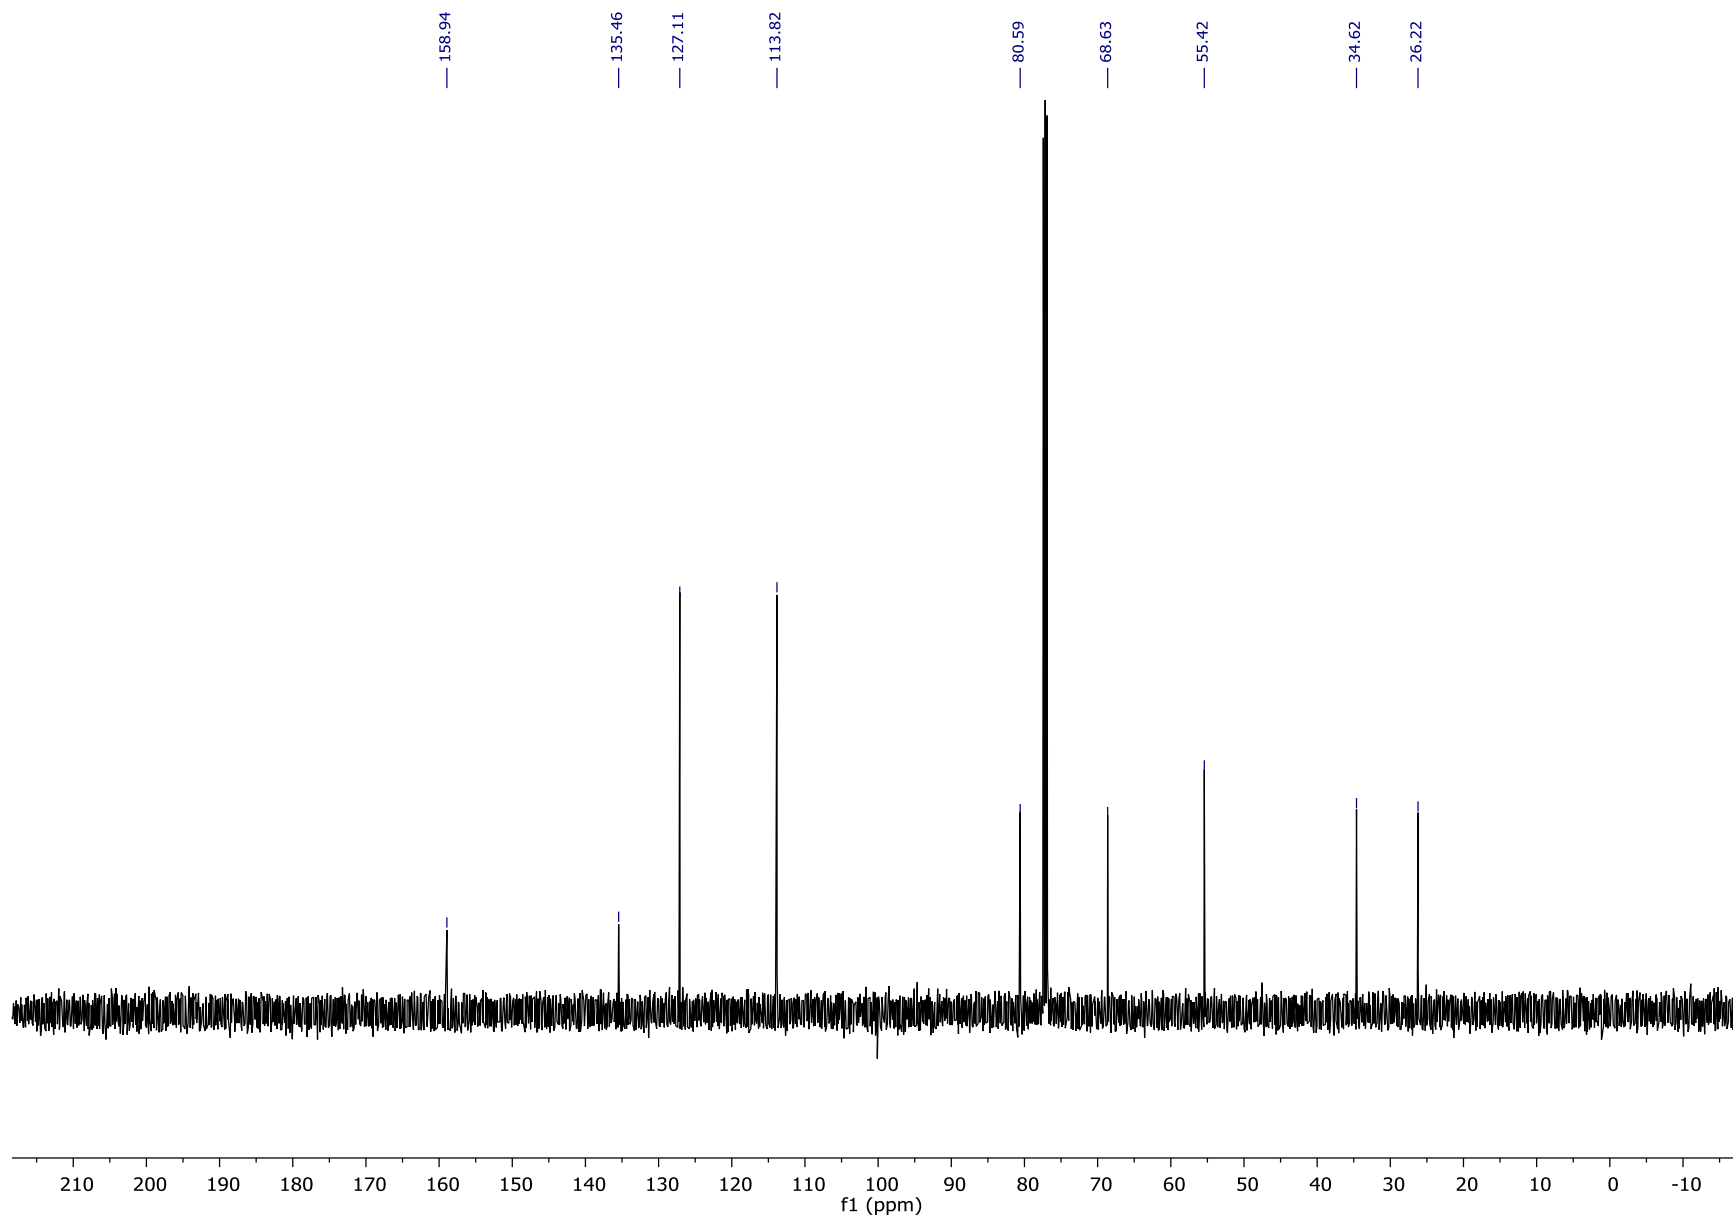

<sup>1</sup>H NMR Spectrum of 2-(3-Methoxyphenyl)tetrahydrofuran (19)

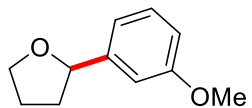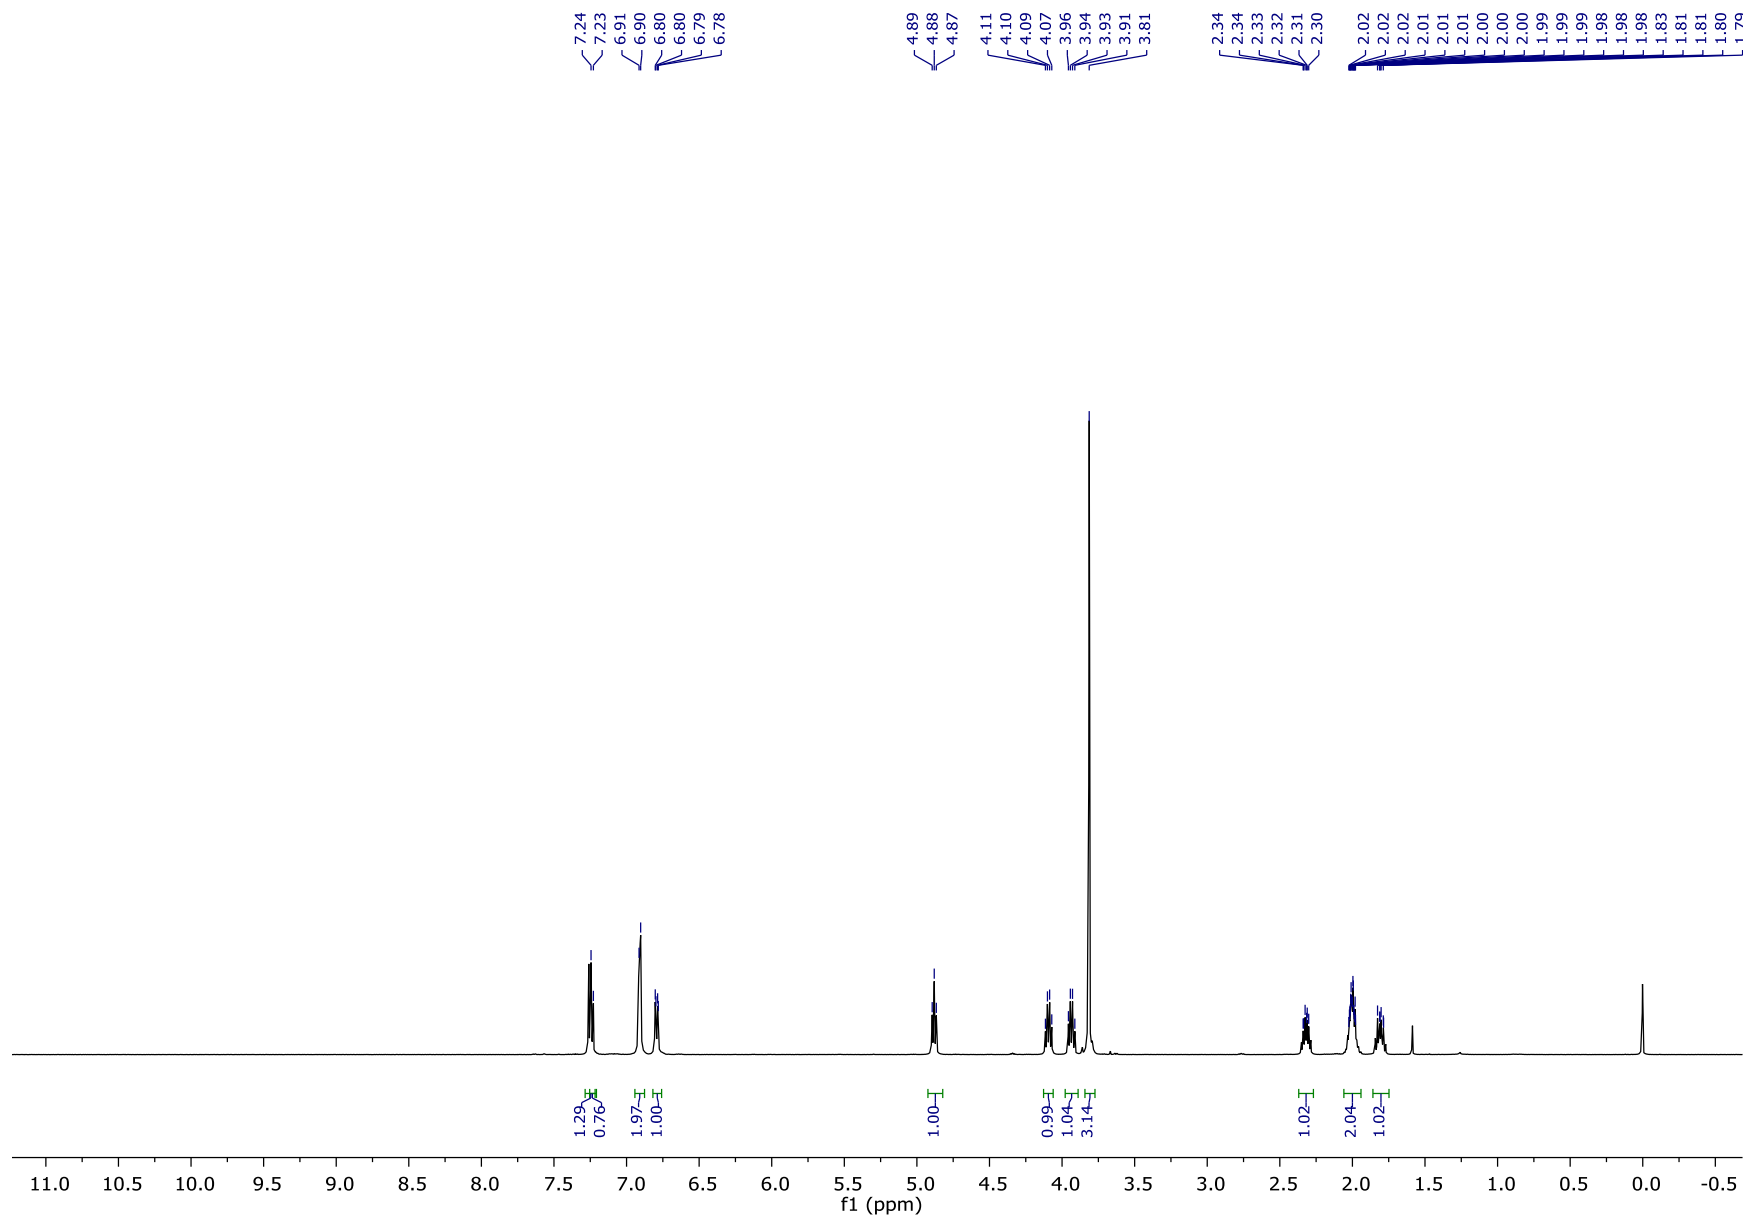

<sup>13</sup>C NMR Spectrum of 2-(3-Methoxyphenyl)tetrahydrofuran (19)

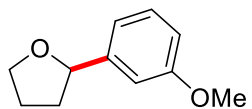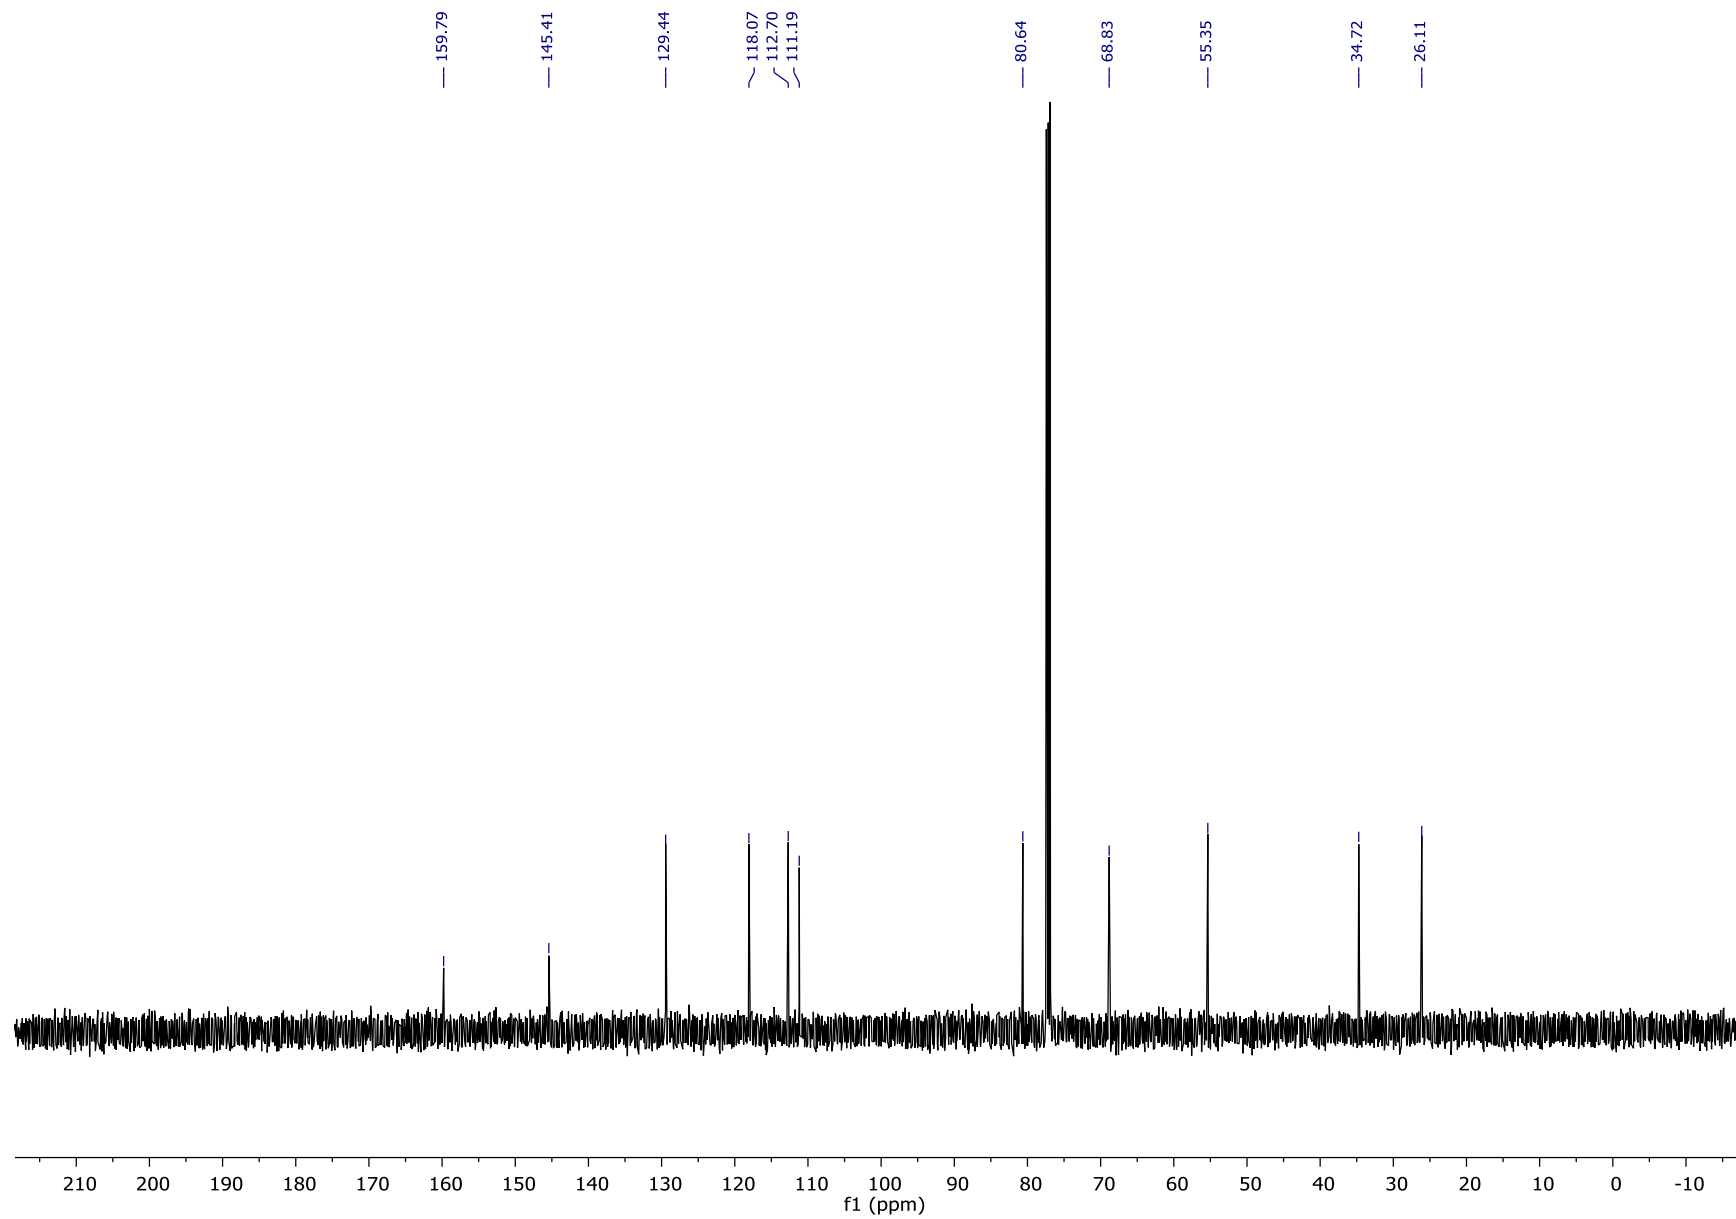

# <sup>1</sup>H NMR Spectrum of 5-(Tetrahydrofuran-2-yl)quinoline (20)

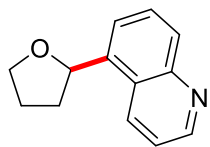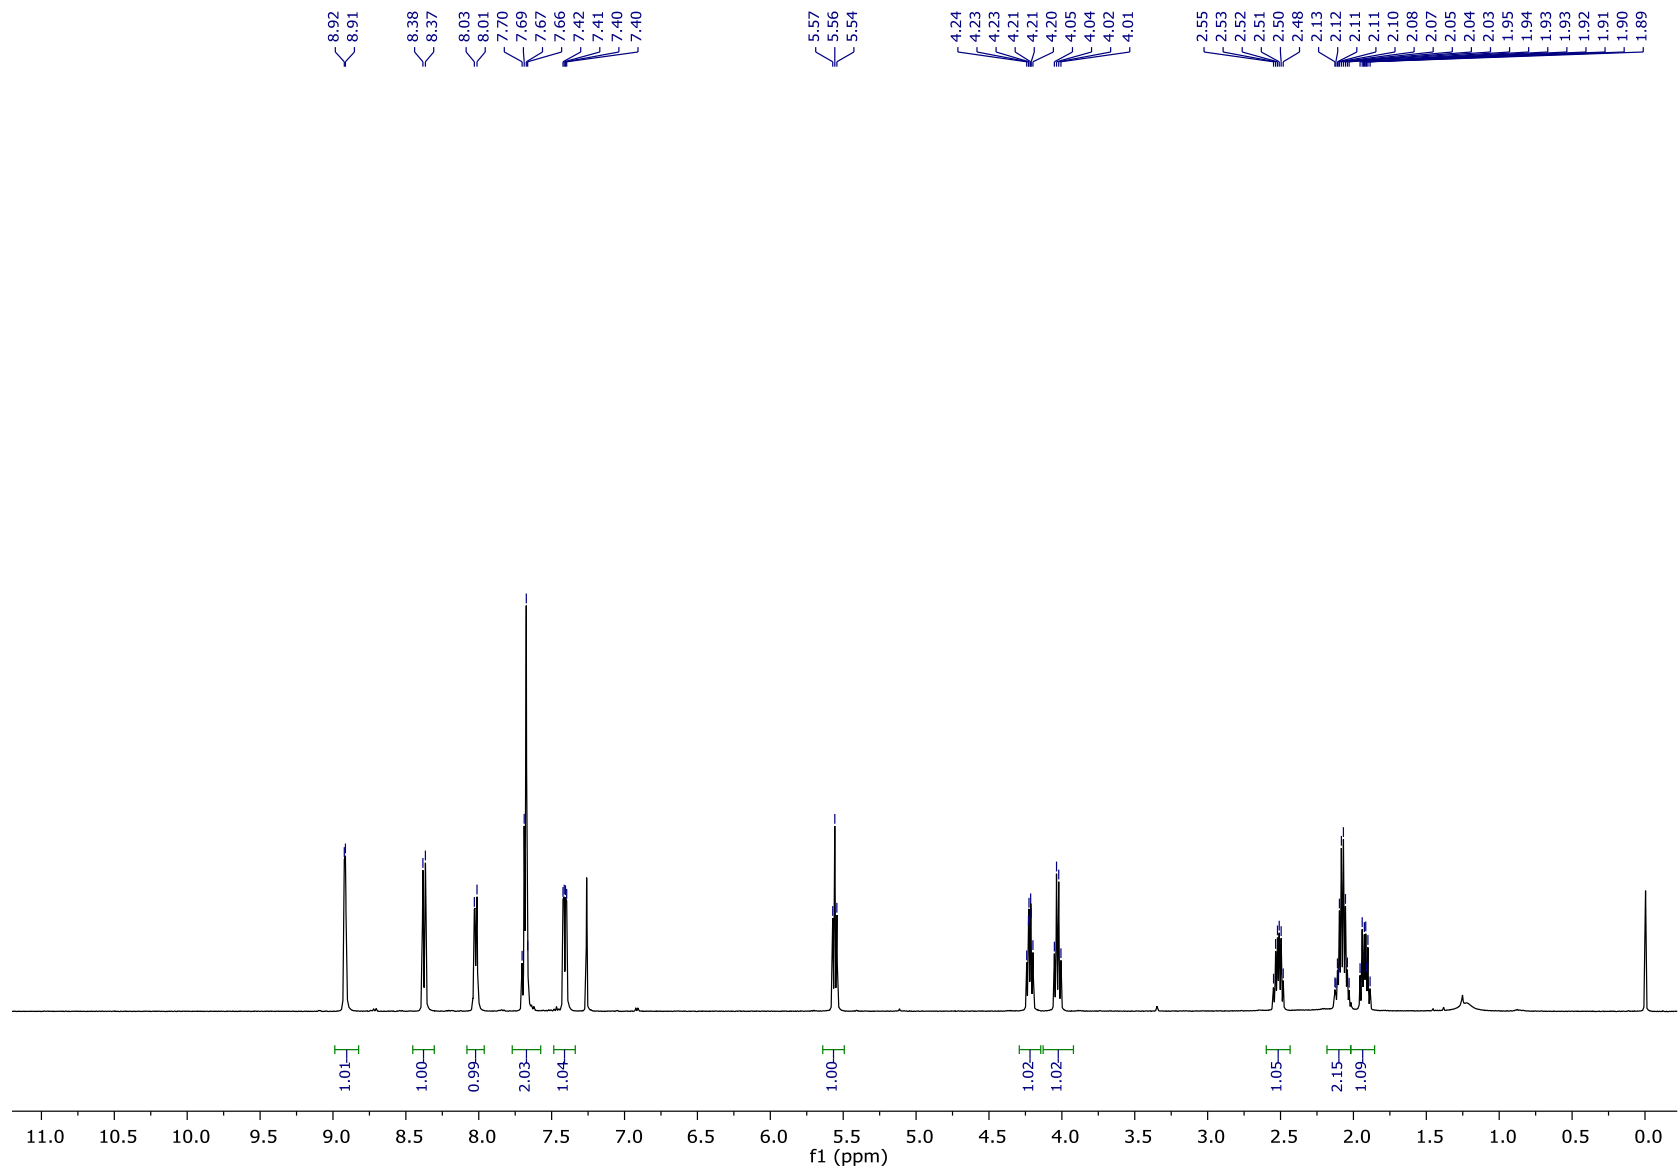



<sup>13</sup>C NMR Spectrum of 5-(Tetrahydrofuran-2-yl)quinoline (20)

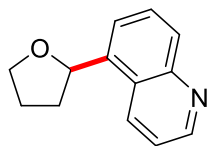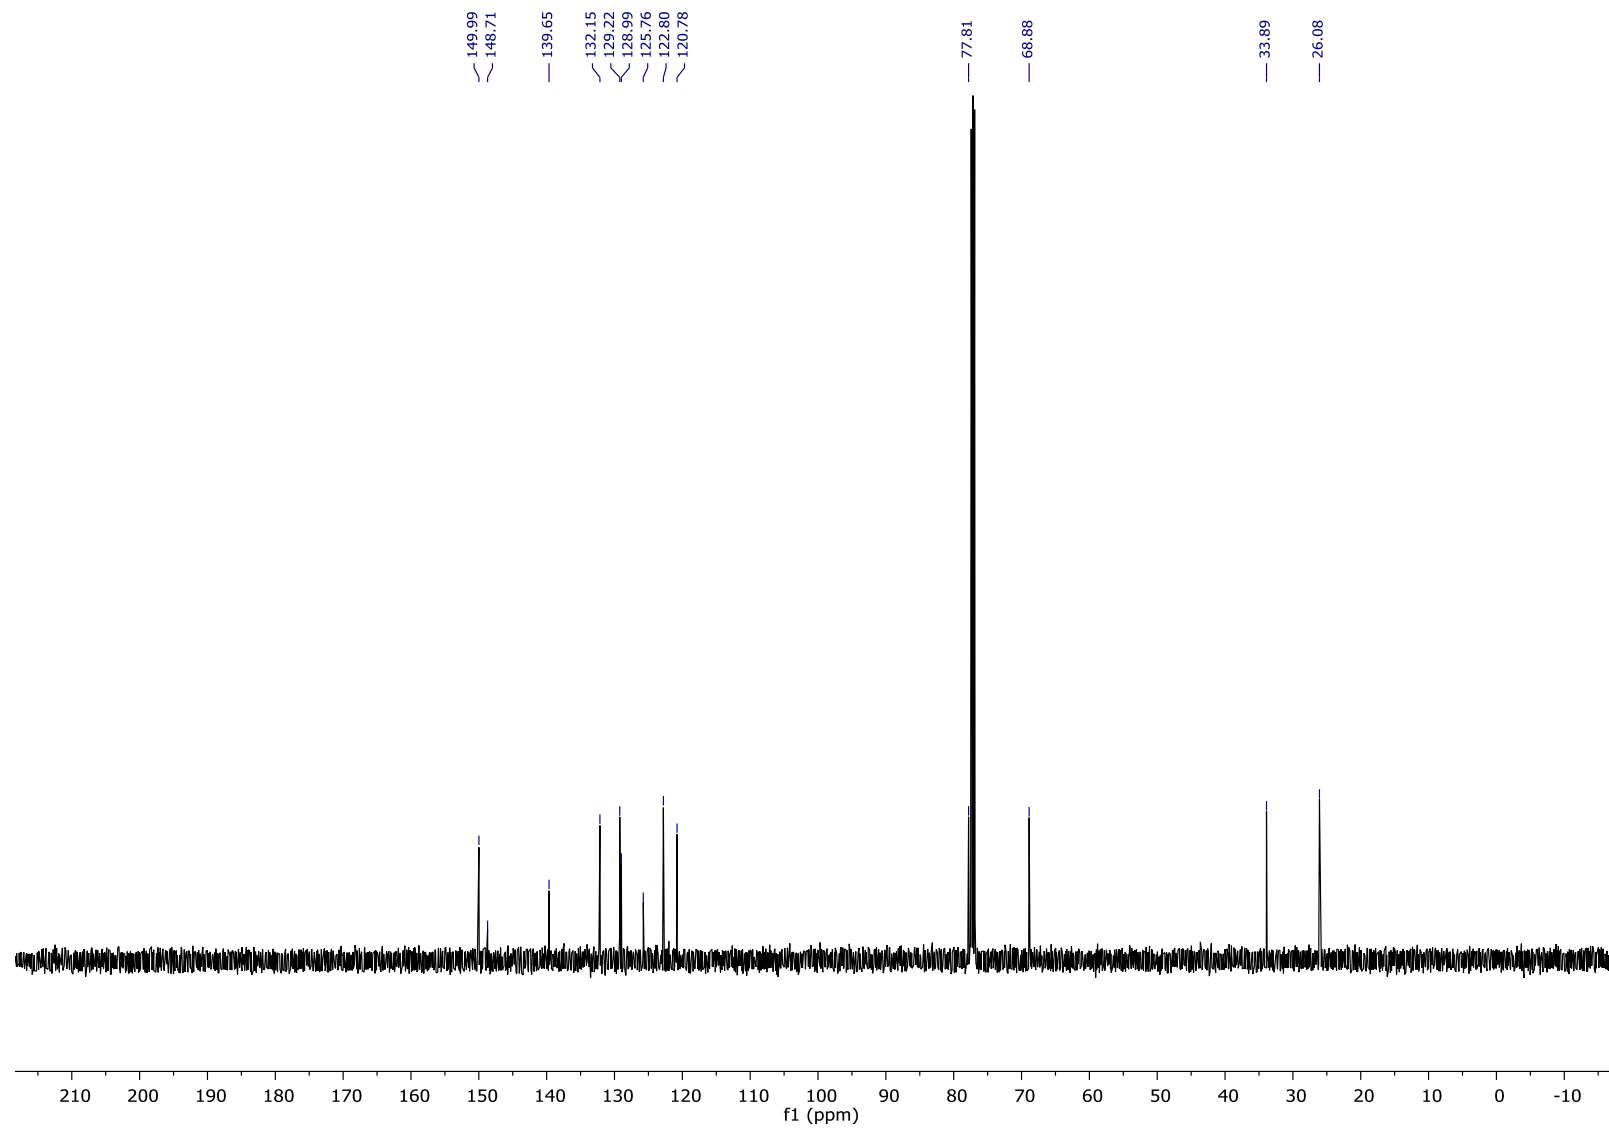

<sup>1</sup>H NMR Spectrum of 5-(Tetrahydrofuran-2-yl)thiophene-2-carbaldehyde (21)

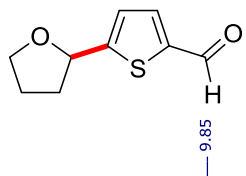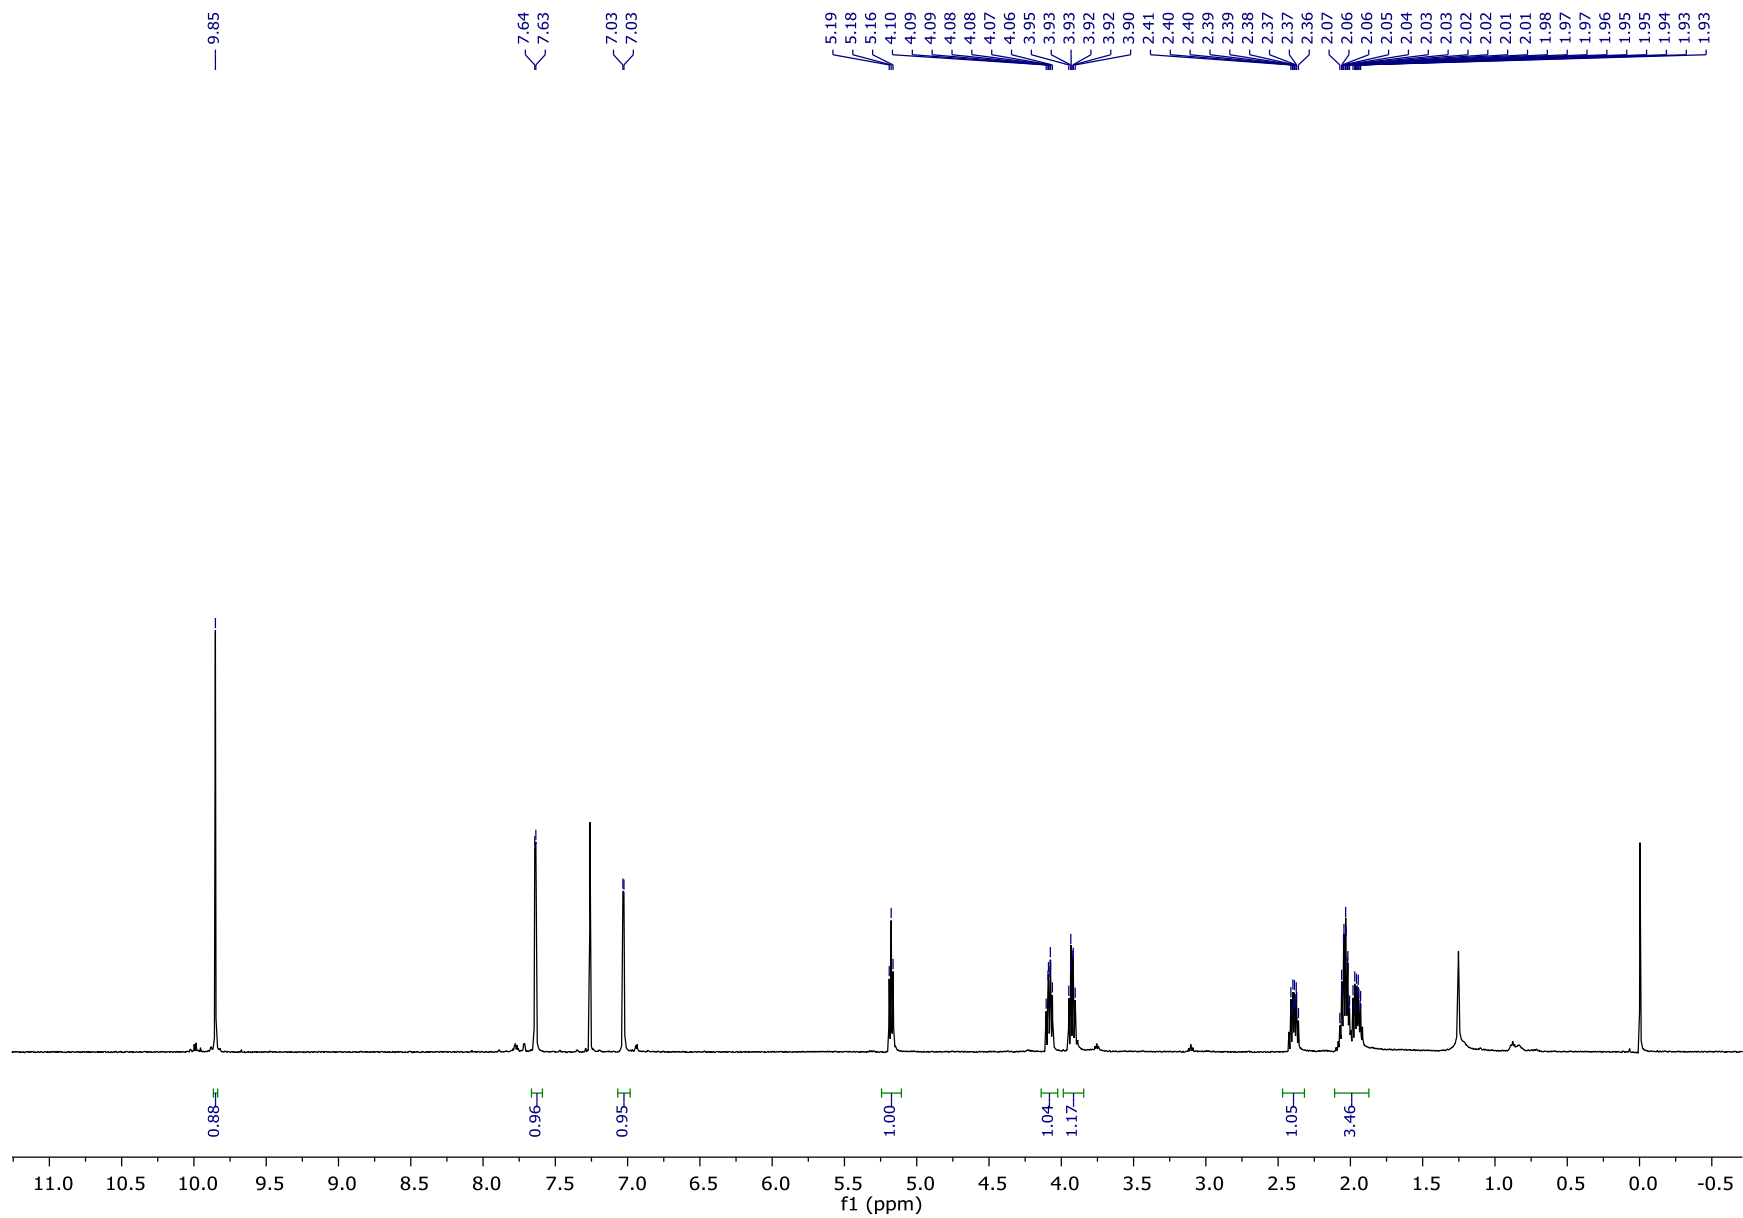

<sup>13</sup>C NMR Spectrum of 5-(Tetrahydrofuran-2-yl)thiophene-2-carbaldehyde (21)

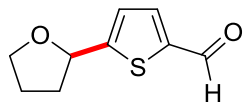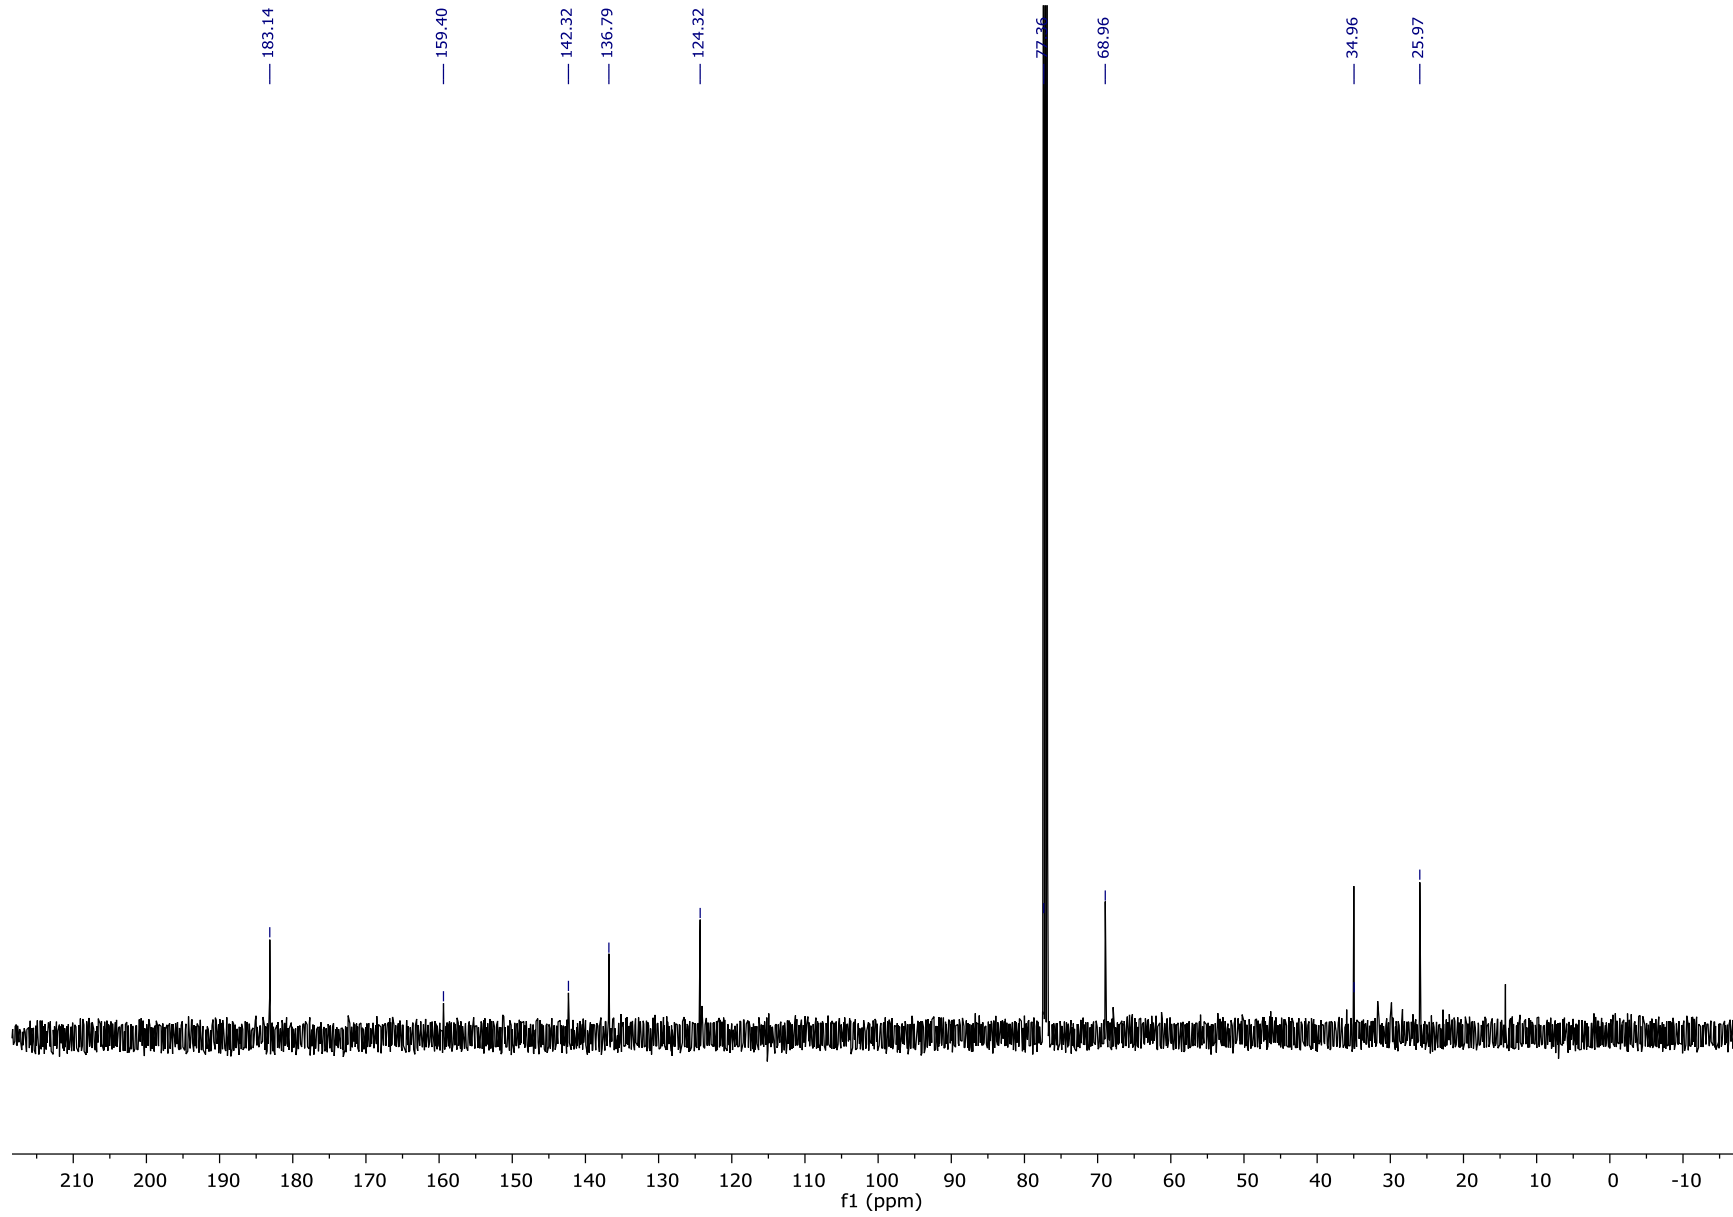

<sup>1</sup>H NMR Spectrum of 2-Fluoro-4-(tetrahydrofuran-2-yl)pyridine (22)

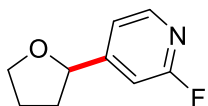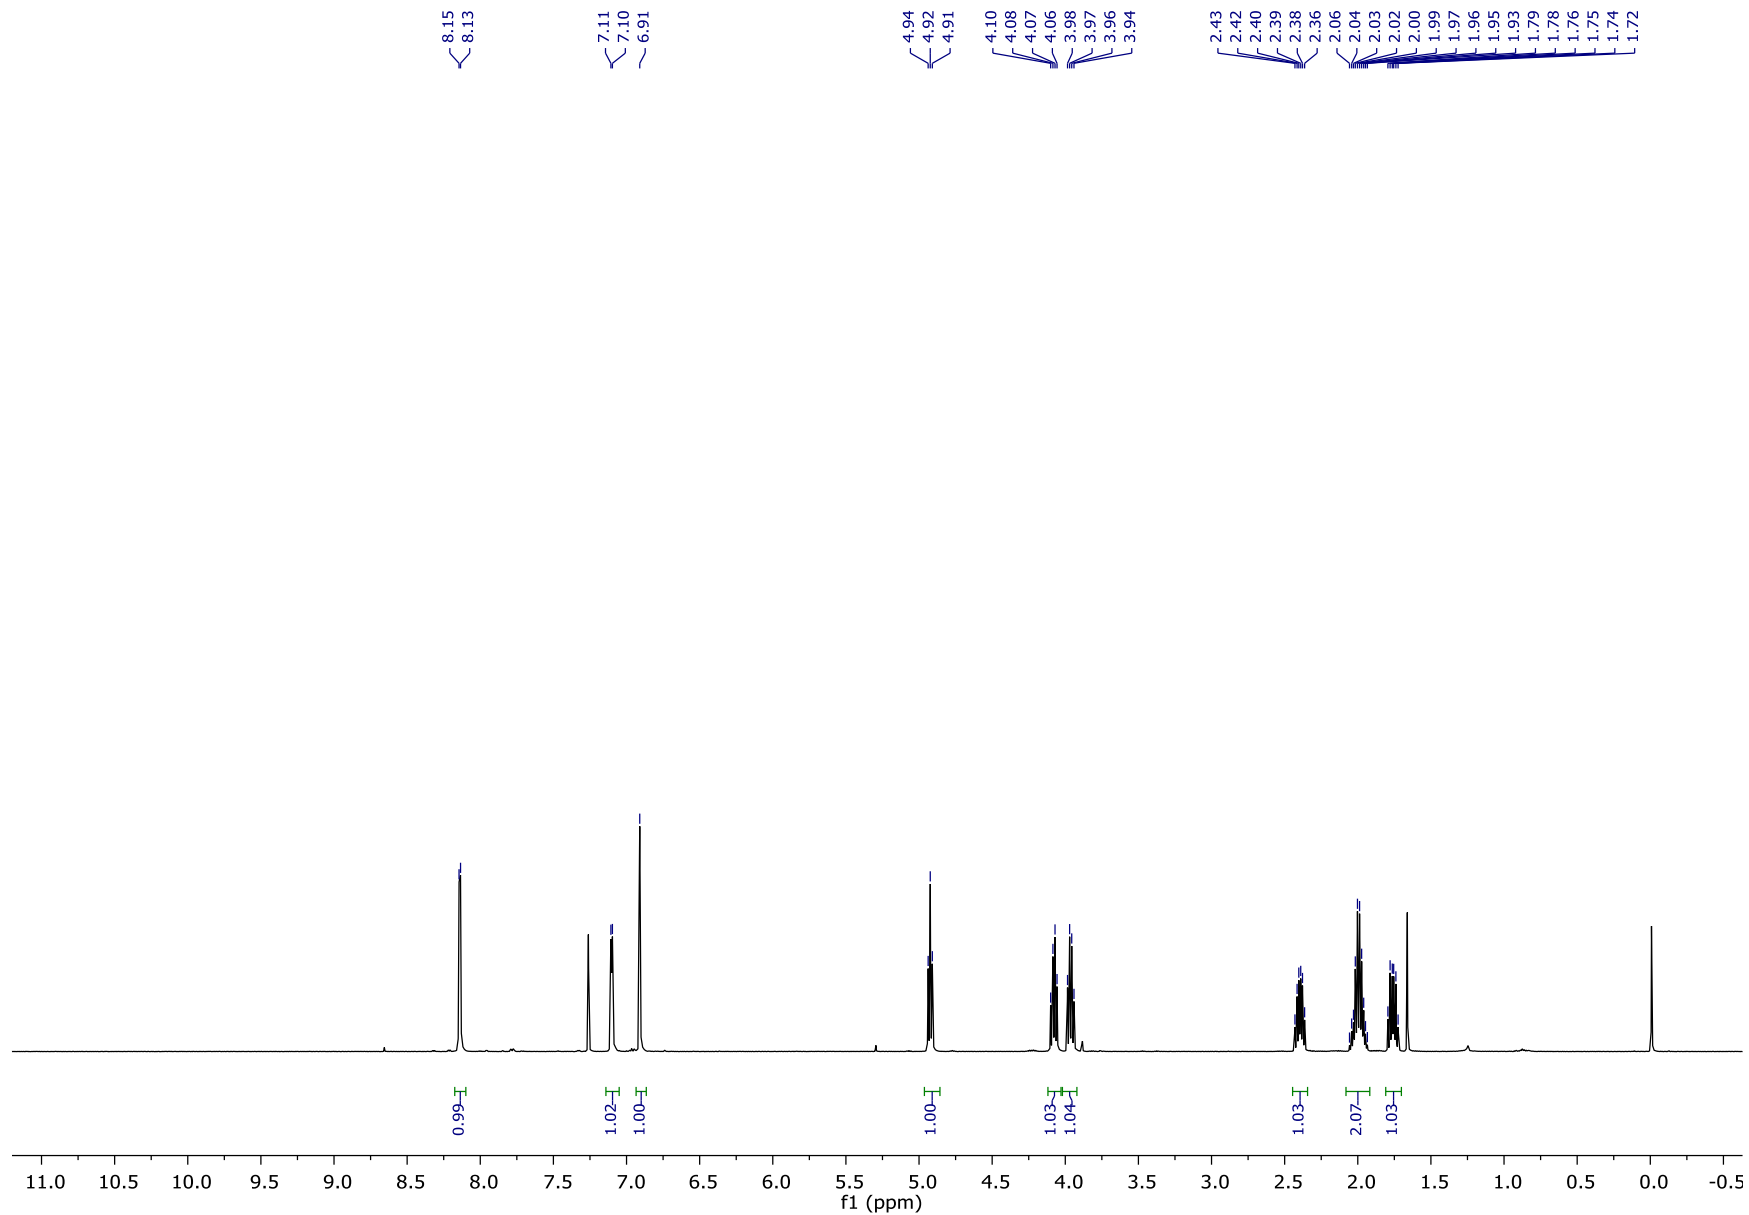

<sup>13</sup>C NMR Spectrum of 2-Fluoro-4-(tetrahydrofuran-2-yl)pyridine (22)



147.69  
147.57

118.40

106.28  
105.98

78.85

69.17

34.41

25.91

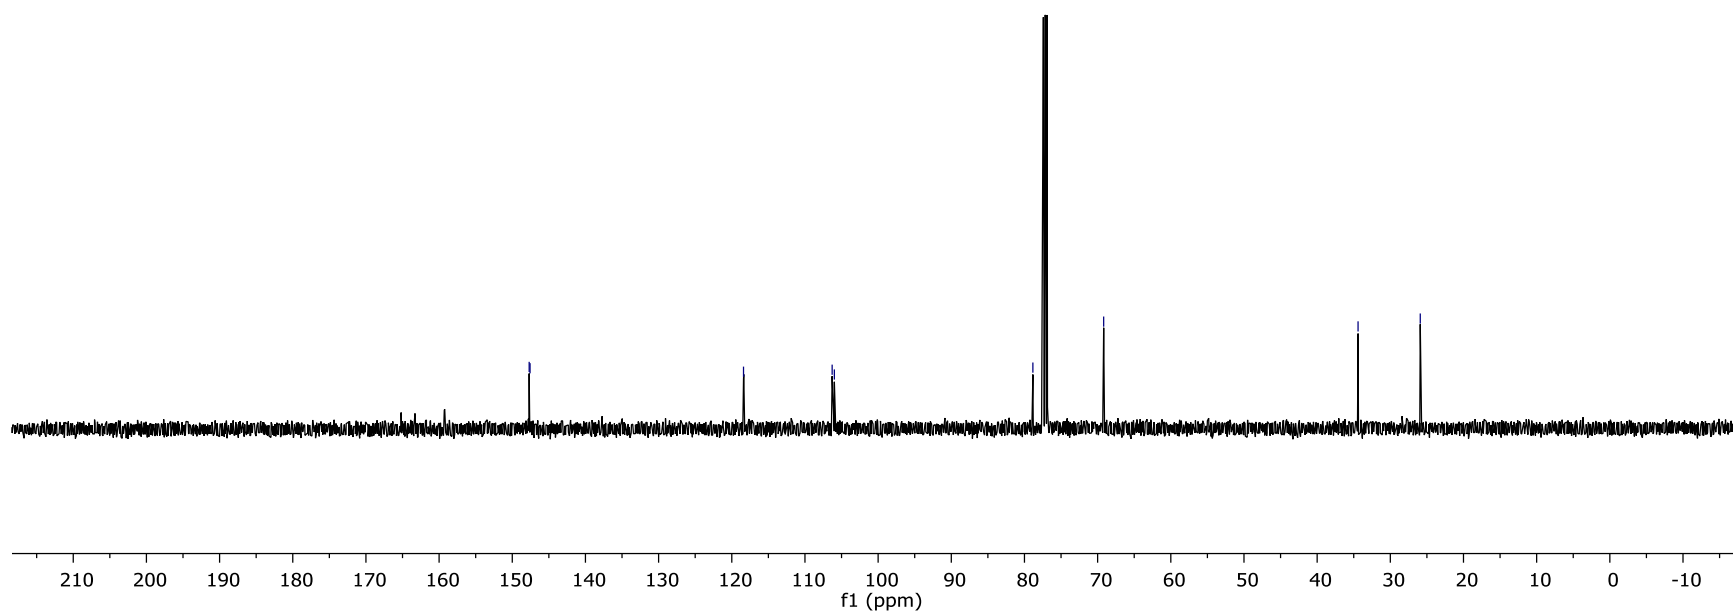

S45

<sup>19</sup>F NMR Spectrum of 2-Fluoro-4-(tetrahydrofuran-2-yl)pyridine (22)

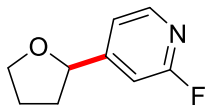

-68.21

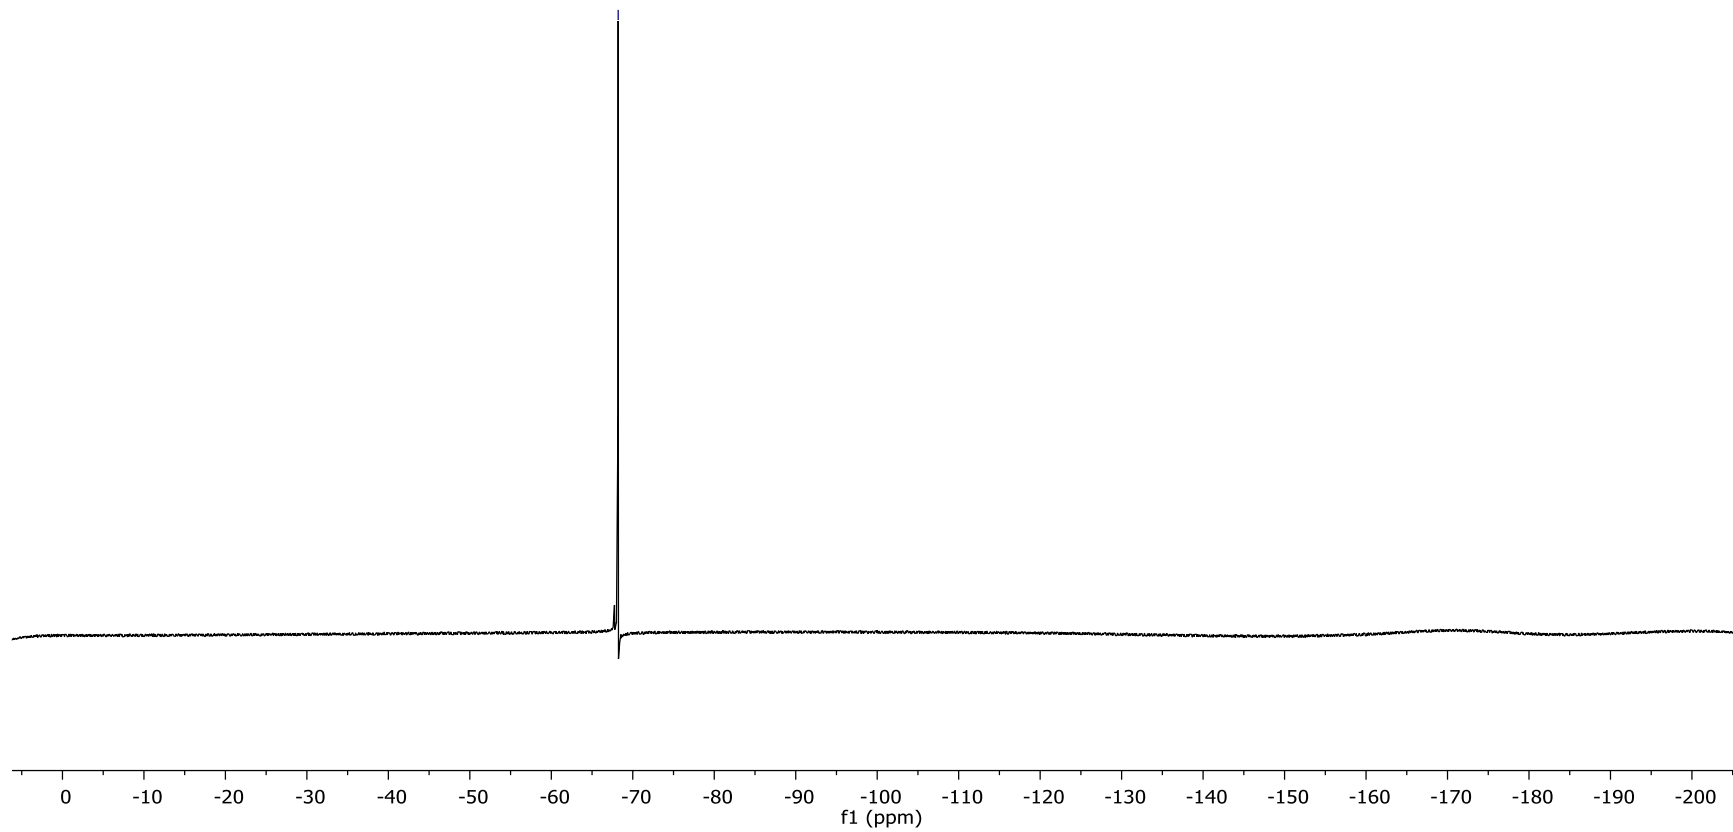

S46

<sup>1</sup>H NMR Spectrum of 3-Chloro-5(tetrahydrofuran-2-yl)pyridine (23)

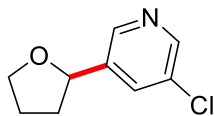

8.46  
8.45  
8.43  
8.42

7.67

4.92  
4.90  
4.89  
4.10  
4.09  
4.08  
4.08  
4.06  
3.96  
3.95  
3.95  
3.94  
3.93  
3.92

2.40  
2.39  
2.37  
2.36  
2.04  
2.02  
2.01  
2.00  
1.80  
1.78  
1.77  
1.76

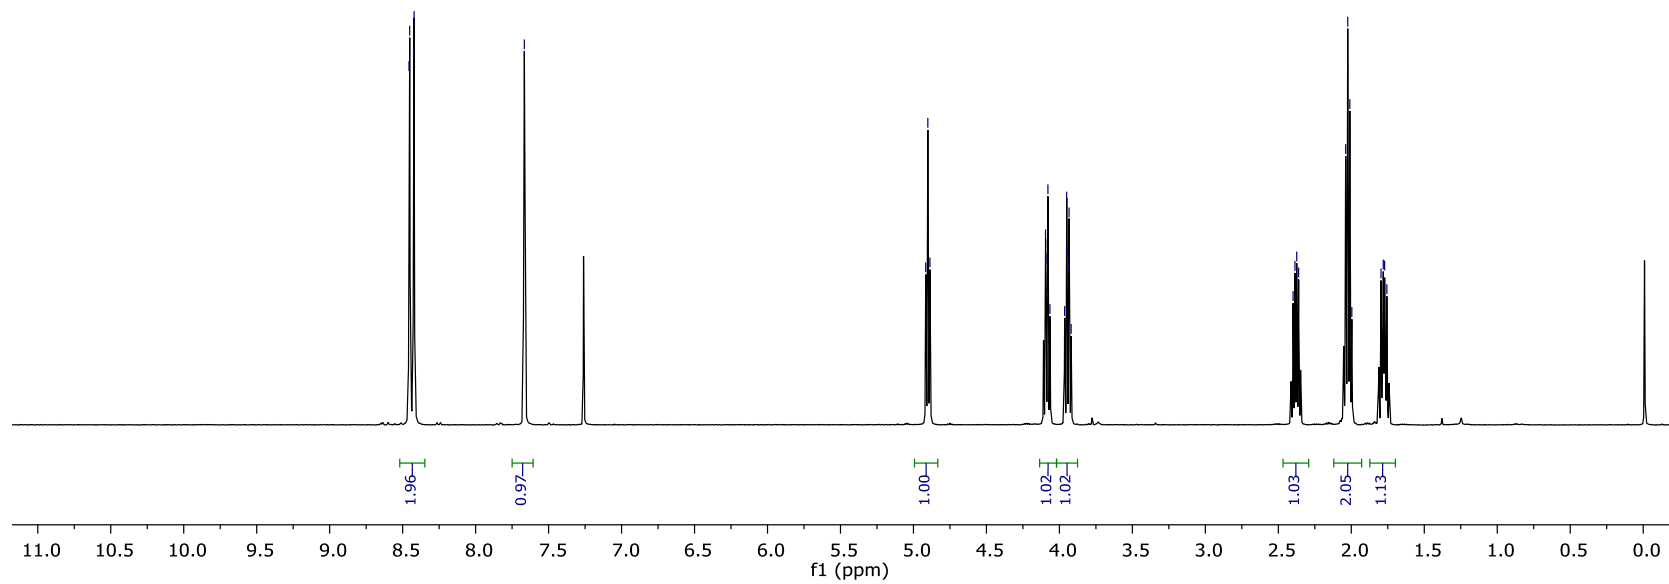

<sup>13</sup>C NMR Spectrum of 3-Chloro-5(tetrahydrofuran-2-yl)pyridine (23)

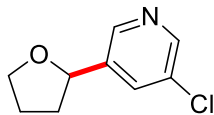

147.60  
145.49  
140.56  
133.16  
132.13

77.83  
69.04

34.70  
26.08

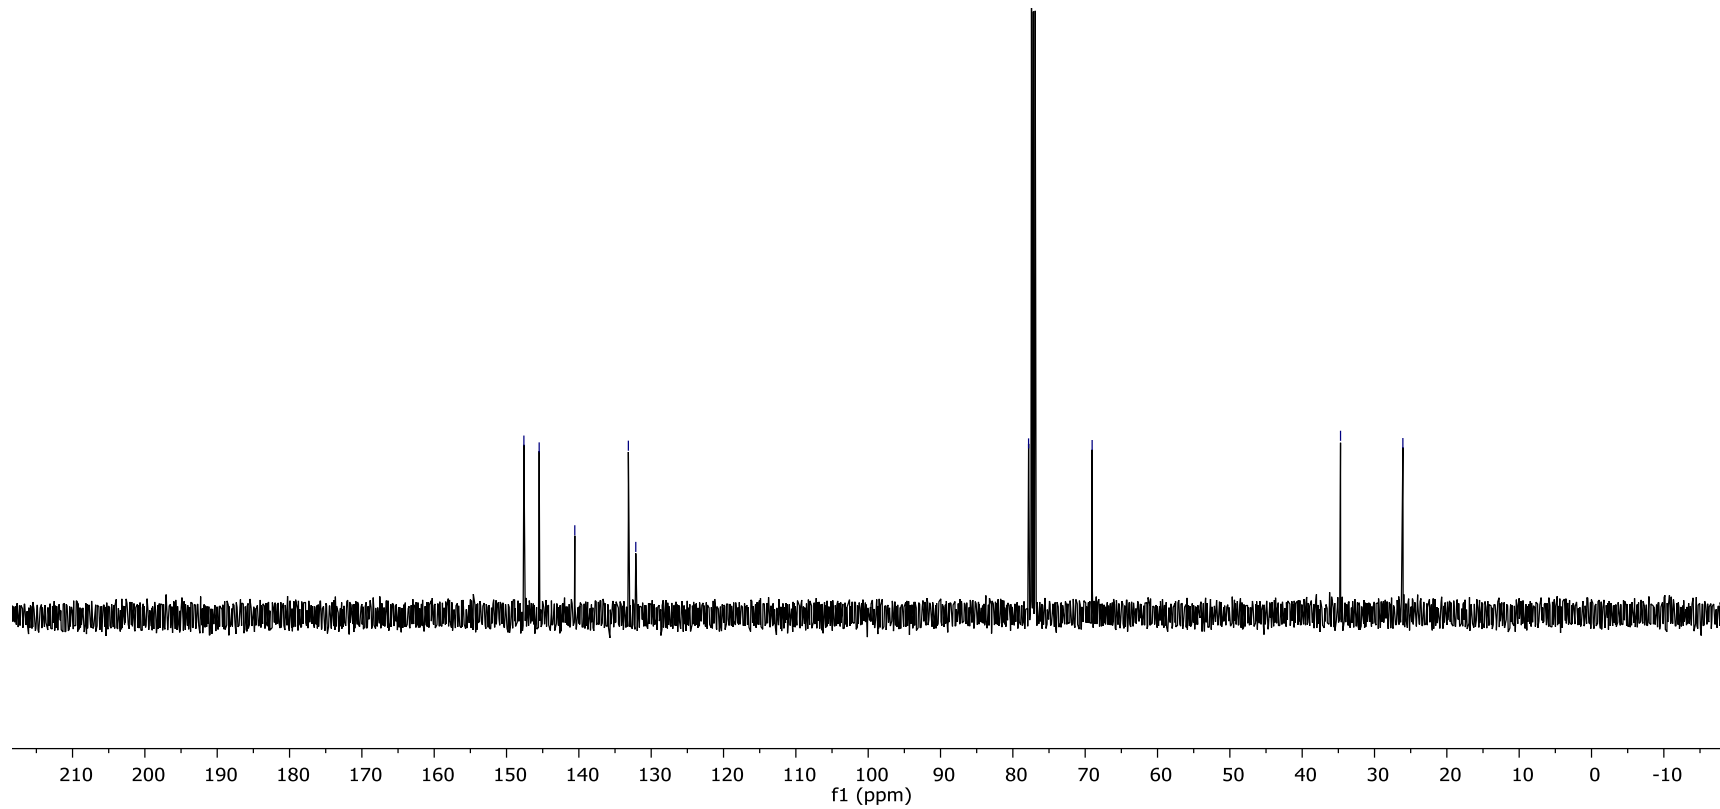



<sup>1</sup>H NMR Spectrum of 2-Phenyl-6-(tetrahydrofuran-2-yl)pyridine (24)

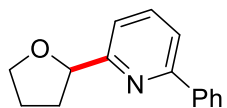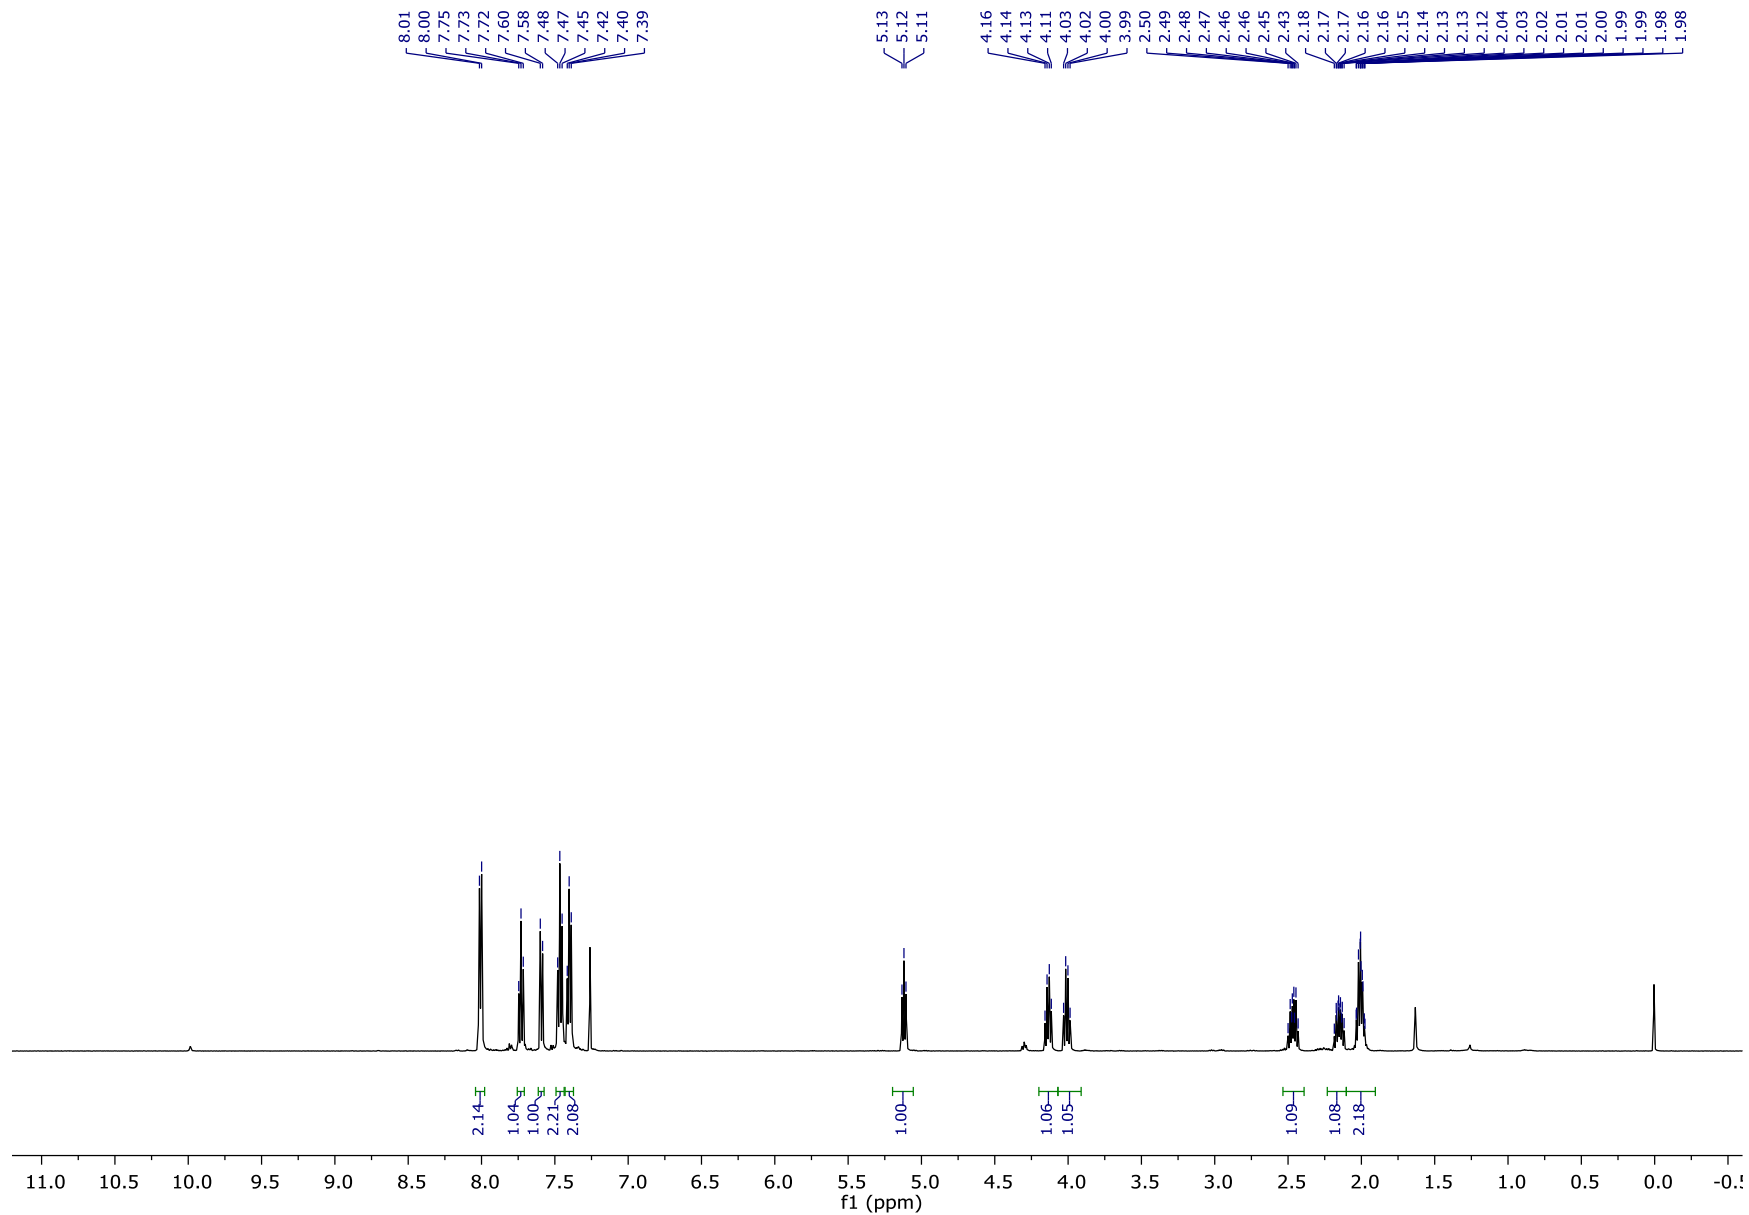

<sup>13</sup>C NMR Spectrum of 2-Phenyl-6-(tetrahydrofuran-2-yl)pyridine (24)

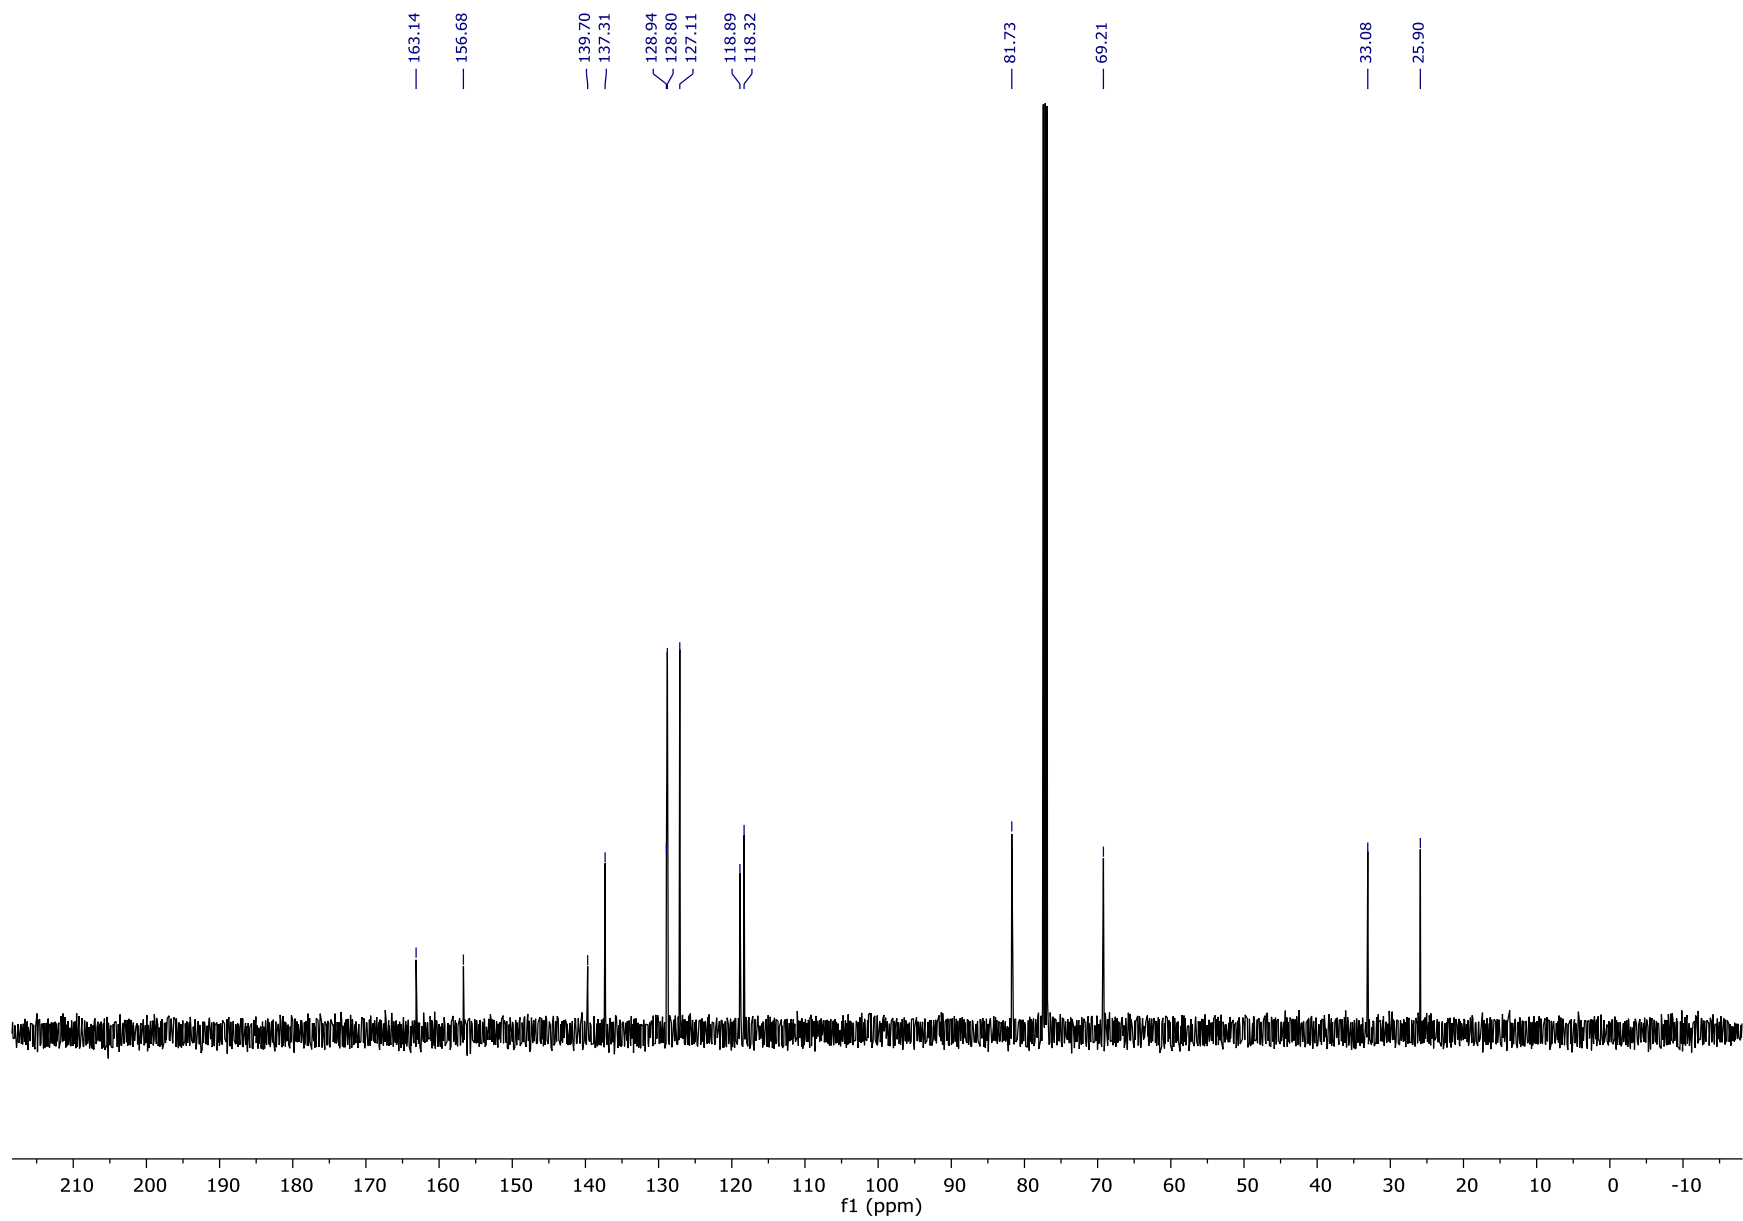

S50

## References

1. Tellis, J. C.; Primer, D. N.; Molander, G. A. *Science* **2014**, 345, 433.
2. Oderinde, M. S.; Varela-Alvarez, A.; Aquila, B.; Robbins, D. W.; Johannes, J. W. *J. Org. Chem.* **2015**, 80, 7642.
3. Lie, D.; Liu, C.; Li, H.; Lei, A. *Angew. Chem., Int. Ed.*, **2013**, 52, 4453.
4. Robertson, F. J.; Wu, J. *J. Am. Chem. Soc.* **2012**, 134, 2775.
5. Tsuji, M.; Higashiyama, K.; Yamauchi, T.; Kubo, H.; Ohmiya, S. *Heterocycles* **2001**, 54, 1027.
6. Ueno, R.; Shirakawa, E. *Org. Biomol. Chem.*, **2014**, 12, 7469.
7. Sing, P. P.; Gudup, S.; Ambala, S.; Singh, U.; Dadhwal, S.; Singh, B.; Sawant, S. D.; Vishwakarma, R. A. *Chem. Commun.* **2011**, 47, 5852.
